1 **Phase separation by the Sterile Alpha Motif of Polyhomeotic compartmentalizes Polycomb Group**  
2 **proteins and enhances their activity**

3

4 Elias Seif<sup>1</sup>, Jin Joo Kang<sup>1,2</sup>, Charles Sasseville<sup>1</sup>, Olga Senkovitch<sup>3</sup>, Alexander Kaltashov<sup>1</sup>, Elodie L. Boulter<sup>1</sup>,  
5 Ibani Kapur<sup>1,2</sup>, Chongwoo A. Kim<sup>3</sup>, and Nicole J. Francis<sup>1,2,4\*</sup>

6

7 <sup>1</sup>Institut de recherches cliniques de Montréal, 110 Avenue des Pins Ouest, Montréal, QC, H2W 1R7,  
8 Canada

9 <sup>2</sup>Division of Experimental Medicine, McGill University, 1001 Decarie Boulevard, Montreal, QC H4A 3J1,  
10 Canada

11 <sup>3</sup>Department of Biochemistry and Molecular Genetics, Midwestern University, 19555 N. 59th St.,  
12 Glendale, AZ 85308

13 <sup>4</sup>Département de biochimie et médecine moléculaire Université de Montréal, 2900 Boulevard Edouard-  
14 Montpetit, Montréal, QC H3T 1J4, Canada.

15 \*Correspondence: [nicole.francis@ircm.qc.ca](mailto:nicole.francis@ircm.qc.ca)

16

17

18

19 **Abstract:**

20 Polycomb Group (PcG) proteins organize chromatin at multiple scales to regulate gene expression. A  
21 conserved Sterile Alpha Motif (SAM) in the Polycomb Repressive Complex 1 (PRC1) subunit  
22 Polyhomeotic (Ph) is important for chromatin compaction and large-scale chromatin organization. Like  
23 many SAMs, Ph SAM forms helical head to tail polymers, and SAM-SAM interactions between  
24 chromatin-bound Ph/PRC1 are believed to compact chromatin and mediate long-range interactions. To  
25 understand mechanistically how this occurs, we analyzed the effects of Ph SAM on chromatin *in vitro*.  
26 We find that incubation of chromatin or DNA with a truncated Ph protein containing the SAM results in  
27 formation of concentrated, phase-separated condensates. Condensate formation depends on Ph SAM,  
28 and is enhanced by but not strictly dependent on, its polymerization activity. Ph SAM-dependent  
29 condensates can recruit PRC1 from extracts and enhance PRC1 ubiquitin ligase activity towards histone  
30 H2A. Overexpression of Ph with an intact SAM increases ubiquitylated H2A in cells. Thus, phase  
31 separation is an activity of the SAM, which, in the context of Ph, can mediate large-scale compaction of  
32 chromatin into biochemical compartments that facilitate histone modification.

33

34

35

36 **Introduction:**

37 Polycomb Group (PcG) proteins repress gene expression by modifying chromatin at multiple  
38 scales, ranging from post-translational modification of histone proteins to organization of megabase  
39 scale chromatin domains<sup>1-6</sup>. Two main PcG complexes, PRC1 and Polycomb Repressive Complex 2  
40 (PRC2), are central to PcG function and conserved across evolution<sup>1-4</sup>. Both complexes can carry out  
41 post-translational modification of histones (methylation of histone H3 on lysine 27 (H3K27me) for PRC2  
42 and ubiquitylation of lysine 118/119 of histone H2A (H2A-Ub) for PRC1. PRC1, and to a lesser extent,  
43 PRC2, are also implicated directly in long range organization of chromatin and clustering of PcG proteins  
44 into foci in cells. Two classes of PRC1 complexes have been defined, canonical (cPRC1), and non-  
45 canonical (ncPRC1). Both types of complexes contain two ring finger proteins required for E3 ubiquitin  
46 ligase activity towards H2A (Psc and dRING in *Drosophila*, Pcgf and Ring1A or B in mammals)<sup>3,4</sup>. cPRC1  
47 additionally contains a Cbx protein (Pc in *Drosophila*), and a PHC (Ph in *Drosophila*). In ncPRC1, RYBP  
48 replaces the Cbx protein, PHCs are absent, other accessory proteins are variably present, depending on  
49 the Pcgf subunit<sup>4</sup>. At least in mouse embryonic stem cells, ncPRC1 is responsible for the bulk of  
50 ubiquitylated H2A<sup>7,8</sup>. This suggests histone modification and chromatin organization may be partitioned  
51 between nc and cPRC1s, although both types of complexes share many genomic targets<sup>7-10</sup>. All cPRC1  
52 subunits can interact with DNA and/or chromatin, and both canonical and non-canonical PRC1s can  
53 compact chromatin *in vitro*<sup>9,11</sup>, but Polyhomeotic (Ph), and thus canonical PRC1, is the most implicated  
54 in large-scale chromatin organization<sup>3,12-17</sup>.

55

56 Ph is a core subunit of canonical PRC1, and its most notable feature is the presence of a  
57 conserved Sterile Alpha Motif (SAM) in its C-terminus that can assemble into helical polymers<sup>18</sup>. SAMs  
58 are present in many different types of proteins and in many cases can mediate protein polymerization  
59 important for gene repression<sup>20,21</sup>. PRC1 forms visible foci both in *Drosophila* and in mammalian  
60 cells<sup>13,22</sup>, and, in *Drosophila* cells, a much larger number of diffraction-limited clusters<sup>14</sup>. Disrupting the  
61 Ph SAM impairs formation of PcG protein clusters and reduces long-range contacts among PcG bound  
62 loci, suggesting the two processes are related<sup>13,14</sup>. Despite the wealth of *in vivo* data supporting the

63 critical function of Ph SAM in large-scale organization of PcG proteins and chromatin, and in gene  
64 regulation, the biochemical mechanisms by which Ph SAM links protein and chromatin organization are  
65 not known.

66 In recent years, an important role for liquid-liquid phase separation (LLPS) in organizing  
67 macromolecules in cells has been defined<sup>23-26</sup>. This mechanism is increasingly accepted as being  
68 important in formation of protein-RNA membraneless organelles<sup>26,27</sup>, and has more recently been  
69 implicated in chromatin compartmentalization and genome organization<sup>28-33</sup>, transcription activation<sup>34-</sup>  
70<sup>37</sup>, DNA repair<sup>38,39</sup>, and PcG protein organization<sup>40-42</sup>. LLPS by nuclear/chromatin associated proteins  
71 may concentrate proteins and RNAs, enhance or inhibit reactions, exclude other factors, and even  
72 physically move genomic regions<sup>23,25,43</sup>. Nucleated phase separation at super-enhancers mediated by  
73 disordered regions in transcription factors and co-activators is believed to be important for driving  
74 cycles of active transcription<sup>34,35</sup>. Phase separation is also implicated in the formation of  
75 heterochromatin and its function as a distinct chromatin environment<sup>30,32</sup>, although the precise role of  
76 LLPS is debated<sup>44</sup>. The mammalian PcG protein Cbx2 (part of certain cPRC1s) has also been shown to  
77 undergo LLPS *in vitro* with chromatin, and to form foci in mammalian cells, suggesting a link between  
78 LLPS and PcG function<sup>40,42</sup>.

79 Here, we consider the hypothesis that Ph SAM can organize chromatin through phase separation  
80 by analyzing Ph-chromatin interactions *in vitro*.

81

## 82 **Results:**

83 **A truncated version of Ph, “Mini-Ph” forms phase separated condensates with DNA or chromatin:** In  
84 *Drosophila melanogaster*, the *Ph* gene is present as a tandem duplication in the genome; the two genes  
85 (*Ph-p* and *Ph-d*) encode highly related proteins with largely redundant function<sup>45</sup>. *Drosophila* Ph is a  
86 large protein (1589 amino acids for Ph-p), the majority of which is disordered (Fig. 1A), and which is  
87 difficult to work with *in vitro*. To focus on the function of the domains conserved in Ph orthologues,  
88 particularly the SAM, and to facilitate biochemical analysis, we used a truncated version of *Drosophila*  
89 Ph-p, termed “Mini-Ph”<sup>5</sup>. Mini-Ph (aa1289-1577) contains the three conserved domains—from amino-  
90 to carboxy-terminus: the HD1, the FCS Zinc finger that can bind nucleic acids<sup>46</sup>, and the Ph SAM (Fig.  
91 1A). An unstructured linker connects the FCS to the SAM, and restricts Ph SAM polymerization<sup>5</sup>. Thus,  
92 while Ph SAM alone forms extensive helical polymers *in vitro*, Mini-Ph exists mainly as short polymers of  
93 4-6 units (Fig. 1B-C), even at high concentrations<sup>5</sup>.

94 We expressed Mini-Ph in *E. coli*, purified it (Supplementary Fig. 1A), and tested whether it can  
95 form phase-separated condensates, alone or with chromatin. Chromatin was prepared on a circular  
96 plasmid containing 40 copies of the *Lytechinus* 5S rDNA nucleosome positioning sequence<sup>47</sup> using  
97 histones fluorescently labelled with Cy3 on histone H2A (Fig. S1C-E). Neither Mini-Ph alone, nor  
98 chromatin alone formed condensates in buffer (Fig. 1D, E). When Mini-Ph is mixed with chromatin, or  
99 plasmid DNA, large, round, phase bright drops are observed (Fig. 1F; Supplementary Fig. 2A). Drops  
100 formed with either DNA or chromatin undergo fusion (Fig. 1G, Supplementary Fig. 2B; Supplementary  
101 Movie 1, 2), and settle to the bottom of the imaging plate where they flatten and continue to fuse (Fig.  
102 1H). Under phase separation conditions, Mini-Ph and DNA can be pelleted by centrifugation  
103 (Supplementary Fig. 2C, D), consistent with them forming a denser phase. Mini-Ph-DNA solutions also  
104 become turbid, as measured by OD<sub>340</sub> (Supplementary Fig. 2E). To evaluate the relationship between the  
105 concentration of chromatin or DNA and Mini-Ph, and phase separation, we titrated both Mini-Ph and  
106 DNA or chromatin, and manually scored each point in the resulting matrix as “one phase” or “two

107 phases” (Fig. 1I, J; Supplementary Fig. 2F, G). This produces a limited coarse-grained delineation of the  
108 boundary between one- and two-phase regimes. Phase separation is sensitive to the concentration of  
109 both components, and the ratio between the two. This is most notable for Mini-Ph-DNA titrations,  
110 where we are able to add high concentrations of DNA, which prevent phase separation (Supplementary  
111 Fig. 2F, G). From similar titrations of NaCl and Mini-Ph at a fixed DNA concentration, we find that phase  
112 separation is observed in NaCl concentrations up to 125 mM (Supplementary Fig. 3). We conclude that  
113 Mini-Ph forms phase separated condensates with either DNA or chromatin.

114 The disordered linker connecting Ph SAM to the FCS domain was previously demonstrated to  
115 restrict Ph SAM polymerization, possibly due to its ability to contact Ph SAM *in trans*<sup>5</sup>. A scrambled  
116 linker has the same effect, implicating amino acid composition rather than organization<sup>5</sup>. The sequence  
117 properties of linkers that connect structured domain play a central role in phase separation<sup>48</sup>, by  
118 restricting or promoting interactions between structured domains, and by contributing weak  
119 interactions<sup>49</sup>. We therefore analyzed the sequence properties of the linker (Supplementary Fig. 4),  
120 both in *Drosophila* Ph, and in the three human homologues (PHC1-3). The Ph linker is acidic (pI 3.9), but  
121 relatively uncharged (fraction charged residues (FCR) =0.15), and does not have strongly segregated  
122 charge (Supplementary Fig. 4B, E, Supplementary Table 1). Overall, the Ph linker is expected to be  
123 collapsed (Supplementary Fig. 4D).

124 The linker region is conserved between the two *Drosophila* Ph homologues (Supplementary Fig.  
125 4F), but both the sequence and charge properties of the linker in mammalian PHCs are distinct  
126 (Supplementary Fig. 4C, D, E, G; Supplementary Table 1). The human PHC linkers are basic (pI >10), more  
127 charged (FCR 0.25-0.34), have more segregated charges, and have a higher fraction of expansion  
128 promoting residues (Supplementary Fig. 4C, E). They occupy a distinct position on the Das-Pappu  
129 diagram of states (Supplementary Fig. 4D), predicting context dependent collapse or expansion.  
130 Previous analysis indicates that the PHC3 linker promotes polymerization of either PHC3 or Ph SAM, and  
131 does not interact with the PHC3 SAM *in trans*<sup>50</sup>. A synthetic linker designed to be unstructured (Rlink<sup>5</sup>)  
132 promotes polymerization of both Ph and PHC3 SAM, and shares properties with PHC linkers, including a  
133 basic pI (Supplementary Table 1). Evolutionary tuning of the linker sequences is likely to affect phase  
134 separation properties of PHCs, although this will need to be tested experimentally.

135  
136 **Chromatin is highly concentrated in Mini-Ph condensates.** One potential function of phase separation is  
137 to concentrate (compact) chromatin. To measure the concentration of chromatin in Mini-Ph-chromatin  
138 condensates, we first prepared calibration curves using the same Cy3-labelled histone octamers  
139 (labelled on H2A) that were used to assemble chromatin (Supplementary Fig. 5A). The concentration of  
140 nucleosomes in Mini-Ph condensates, starting from a mixture of 150 nM nucleosomes, and 5  $\mu$ M Mini-  
141 Ph, was measured as 22.5 +/- 4.4  $\mu$ M (Supplementary Fig. 5B). We note that this value is lower than the  
142 reported concentration of chromatin in pure chromatin condensates induced by monovalent cations  
143 ( $\sim$ 340  $\mu$ M<sup>28</sup>). The reported measurements used free dye to prepare the calibration curve. When we  
144 imaged calibration curves prepared from free Cy3, although the curves are linear, they predict at least a  
145 60x higher concentration than curves prepared with labelled histone octamers using the same imaging  
146 parameters. Because ladders prepared with free Cy3 do not accurately predict known concentrations of  
147 Cy3-labelled histone octamers in our hands, we believe the chromatin concentrations measured using  
148 the Cy3-labelled histone calibration curve (Supplementary Fig. 5) are correct for Mini-Ph-chromatin  
149 condensates.

150



151 **Mini-Ph is dynamic in condensates, but chromatin intermixes slowly.** A characteristic of liquid  
152 condensates is that the components are dynamic. We carried out fluorescent recovery after  
153 photobleaching (FRAP) experiments with Mini-Ph-chromatin condensates. A fraction of Mini-Ph is  
154 mobile and exchanges in condensates, so that bleached Mini-Ph drops partially recover fluorescence  
155 within several minutes (Fig. 2A, B; Supplementary Fig. 6A-D). In contrast, when the histones (labelled  
156 with H2A-Cy3) were bleached, less than 15% of the fluorescence is recovered after several minutes (Fig.  
157 2B, Supplementary Fig. 6E, F). We quantified our FRAP data with user selected ROI for the bleach area  
158 and background, and fit the data with a double exponential function. Recent work has drawn attention  
159 to the complexity of FRAP measurements in phase-separated condensates, and in selecting and applying  
160 the appropriate biophysical model to the data<sup>51</sup>. Because of the complexities cited above, we interpret  
161 the FRAP curves qualitatively. Although we have calculated the half-times of the fast and slow  
162 populations and mobile fractions from our data (Supplementary Fig. 6A-D), we do not think these  
163 numbers can be used to compare with other systems, or with the measured FRAP behavior of Ph *in vivo*  
164<sup>52</sup>. Nevertheless, they indicate that Mini-Ph and chromatin have very different kinetics in condensates.  
165 Similar behavior has been dissected in a model system of lysine or arginine rich peptides and  
166 homopolymers of RNA<sup>53</sup>. In this case, slow kinetics for the RNAs could be explained by RNA-RNA  
167 interactions<sup>53</sup>. It is possible that nucleosome-nucleosome interactions contribute to the slow kinetics of  
168 chromatin. However, it must also be emphasized that the chromatin templates used in these  
169 experiments are large (11 kb of DNA, ~55 nucleosomes, ~13750 kDa). This system may partially mimic  
170 chromatin *in vivo*, which also does not freely intermix (discussed in<sup>54</sup>). Experiments with 12-nucleosome  
171 linear arrays (more than 4X smaller than the templates used here) indicate that while chromatin alone  
172 can form a liquid like state that shows (slow) recovery in FRAP experiments<sup>28</sup>, in most conditions,  
173 chromatin forms condensates that behave as solids and do not recover in FRAP experiments, similar to  
174 chromatin *in vivo*<sup>55</sup>.

175 To further understand how chromatin intermixes in condensates, we used two-colour chromatin  
176 experiments (Fig. 2C-H). Mini-Ph was incubated separately with chromatin labelled with Cy3 or Alexa  
177 647. Once condensates had formed, the two sets were mixed together, and images collected as the  
178 condensates fused (Fig. 2C-H). Although condensates of both colours fused, ultimately forming a fused  
179 network at the bottom of the imaging plate (Fig. 2G, H), distinct Cy3 and Alexa-647 regions remained,  
180 indicating that the chromatin in pre-formed condensates does not fully intermix when the condensates  
181 fuse, at least over the 60 minutes that we monitored (Fig. 2H). This is in clear contrast to control  
182 experiments in which the two chromatins are mixed prior to addition of Mini-Ph, where all structures  
183 contain a uniform mix of both fluorophores (Fig. 2C, D). These experiments are consistent with the  
184 coexistence of different dynamics in Mini-Ph-chromatin condensates. The persistence of unmixed  
185 regions could also reflect dynamically arrested phase separation in the pre-formed condensates. We  
186 note that in the mixtures shown in Fig. 2C-H, the Alexa-647 labelled chromatin (white in Fig. 2) has a  
187 slightly lower nucleosome density than the Cy3 (red) labelled chromatin. The persistent unmixed regions  
188 tend to be red regions at the junctions of fused drops. This raises the possibility that nucleosome density  
189 affects chromatin dynamics in condensates, due to nucleosome-nucleosome interactions, or  
190 nucleosome-Mini-Ph interactions. We conclude that although a fraction of Mini-Ph in Mini-Ph-chromatin  
191 condensates is mobile, the chromatin polymers mix slowly and incompletely, a process that could  
192 maintain partial compartmentalization of Mini-Ph bound chromatin over short (minutes to hours) time  
193 scales.

194

195 **Ph SAM, but not its polymerization activity, is required for formation of phase-separated condensates.**

196 To test whether Ph SAM is important for condensate formation by Mini-Ph, we prepared Mini-Ph lacking  
197 the SAM (Mini-Ph $\Delta$ SAM), or lacking the HD1/FCS domains (Mini-Ph $\Delta$ FCS) (Fig. 3A; Supplementary Fig.  
198 1A). The structure of Ph SAM, including its two polymerization interfaces, termed “End Helix” (EH) and  
199 “Mid Loop” (ML) is well characterized<sup>18</sup> (Fig. 3B). Mutation of these interfaces blocks SAM  
200 polymerization *in vitro* and impairs Ph function *in vivo*<sup>5,18,20</sup>. We therefore prepared Mini-Ph containing  
201 a point mutation that disrupts the EH interface (L1565R) (“Mini-Ph EH”), or a single point mutation that  
202 weakens but does not fully disrupt the ML interface (L1547R) (“Mini-Ph ML”) (Supplementary Fig. 1A).  
203 Previous AUC experiments with these mutants indicate that Mini-Ph ML forms shorter polymers than  
204 Mini-Ph, and Mini-Ph EH at most may form some dimers at high concentrations (see Fig. 3 of<sup>5</sup>) We first  
205 measured the DNA binding activity of each of these proteins using double filter binding with a 150 bp  
206 DNA probe (Fig. 3C, D; Supplementary Fig. 7A). Mini-Ph binds DNA with an apparent K<sub>d</sub> (K<sub>d</sub><sub>app</sub>) of 37 nM.  
207 Partial disruption of polymerization activity with the single ML mutation increases the K<sub>d</sub><sub>app</sub> to 190 nM.  
208 The more severe EH mutation further increases the K<sub>d</sub><sub>app</sub> to 706 nM, similar to the K<sub>d</sub><sub>app</sub> of Mini-  
209 Ph $\Delta$ SAM (990 nM). DNA binding was not detected with Mini-Ph $\Delta$ FCS by filter binding or EMSA  
210 (Supplementary Fig. 7B), indicating that Ph SAM does not bind DNA. Consistent with this conclusion, the  
211 K<sub>d</sub><sub>app</sub> of Mini-Ph $\Delta$ SAM is similar to that for Mini-Ph EH. The much lower K<sub>d</sub><sub>app</sub> of Mini-Ph presumably  
212 reflects cooperative binding by Mini-Ph oligomers. We do not know what the oligomeric state of Mini-Ph  
213 is at the concentrations where DNA binding is observed. The K<sub>d</sub><sub>app</sub> of the SAM-SAM interaction was  
214 previously measured as ~200 nM using an immobilized SAM<sup>18</sup>, but it is possible that Mini-Ph  
215 oligomerization occurs at lower concentrations, which would be consistent with the observed high  
216 affinity binding. We conclude that the polymerization activity of Ph SAM increases the affinity of Mini-Ph  
217 for DNA.

218 Neither Mini-Ph $\Delta$ SAM nor Mini-Ph $\Delta$ FCS forms condensates with chromatin or with DNA (Fig. 3E,  
219 F). A mixture of the two proteins also does not form condensates with DNA (Fig. 3F). Thus, both the  
220 SAM, and the HD1/FCS domains are required for phase separation. We then tested the Mini-Ph  
221 polymerization mutants (Mini-Ph ML and Mini-Ph EH). We find that both form phase separated  
222 condensates with chromatin or DNA under the same conditions as Mini-Ph (Fig. 3G, Supplementary  
223 Figure 8). While the concentration of nucleosomes in condensates is similar (Fig. 3H), condensates  
224 formed with Mini-Ph EH are smaller (Fig. 3I, J).

225 To look more carefully at the effects of the Ph SAM mutations, we titrated Mini-Ph EH or Mini-  
226 Ph ML with DNA over a range of NaCl concentrations, and scored each reaction as one-phase or two  
227 phases (Supplementary Fig. 8). We find that both mutants are more sensitive to NaCl than Mini-Ph  
228 (Supplementary Fig. 3A, B, 8A-C). ATP has been shown to dissolve many protein-RNA condensates, and  
229 is hypothesized to have a physiological role in regulating phase separation<sup>56</sup>. To test whether ATP might  
230 also regulate Mini-Ph-chromatin condensates, we formed condensates with Mini-Ph, Mini-Ph ML, or  
231 Mini-Ph EH, and challenged them with 2 mM ATP for 15 or 60 min. (Supplementary Fig. 9A).  
232 Condensates are smaller after ATP treatment, and Mini-Ph EH is more sensitive than either Mini-Ph or  
233 Mini-Ph ML (Supplementary Fig. 9 B-E). Treatment of Mini-Ph condensates with 8 mM ATP completely  
234 dissolves them (Supplementary Fig. 10F). We conclude that the Ph SAM, and the HD1/FCS regions are  
235 both required for condensate formation, while Ph SAM polymerization activity, which increases DNA  
236 binding affinity and changes the oligomeric state of Mini-Ph, enhances condensate formation but is not  
237 required for it. Although this result may seem surprising, it is consistent with Mini-Ph existing in a  
238 limited oligomeric state prior to condensate formation that cannot be increased further.

239 Mini-Ph EH and Mini-Ph $\Delta$ SAM have similar DNA binding activities (Fig. 3C), but different abilities  
240 to form condensates (Fig. 3D-F). This indicates that the SAM imparts an activity (presumably protein-  
241 protein interactions) that is distinct from the effect on DNA binding and polymerization, but essential for  
242 condensate formation. The unstructured linker that connects the FCS/HD1 to the Ph SAM  
243 (Supplementary Fig. 4A) was previously shown to interact with the SAM (*in trans*) by NMR<sup>5</sup>. This linker-  
244 SAM interaction may allow homotypic interactions between Mini-Ph molecules, even when SAM-SAM  
245 interactions are disrupted (as in Mini-Ph EH) and contribute to phase separation. It is also possible that  
246 weak SAM-SAM interactions can occur in the EH mutant<sup>5</sup> and contribute to phase separation. Ph SAM  
247 polymerization may thus indirectly contribute to phase separation by clustering the DNA binding FCS  
248 domains (increasing multivalency) and increasing the affinity for DNA/chromatin. Supplementary Fig. 10  
249 summarizes the known and hypothesized interactions that may underlay phase separation by Mini-Ph  
250 and DNA or chromatin.

251  
252 **DNA binding and phase separation modify lysine accessibility in Mini-Ph:** To explore how Mini-Ph  
253 interactions change on formation of phase separated condensates, and how SAM polymerization affects  
254 them, we used a mass spectrometry based protein footprinting method to probe accessible lysines in  
255 Mini-Ph (Fig. 4A). We incubated Mini-Ph alone, or with three different amounts of DNA. In the 1X DNA  
256 condition (1 Mini-Ph per 10 bp) and 2X DNA conditions, phase separated condensates form, while  
257 increasing the DNA amount to 16X prevents their formation (Fig. 4B). To display the data, we generated  
258 a heat map of the average accessibility at each lysine under each condition (Fig. 4C). To compare these  
259 values, we used student's t-tests at each lysine position. Accessibility of lysines in the HD1 and FCS  
260 domains of Mini-Ph are changed on binding DNA: K1302 and K1340 of the HD1 in Mini-Ph are less  
261 accessible in the 2X DNA conditions (condensates present), while K1298 and K1302 are less accessible in  
262 the 16X DNA condition (Fig. 4C). As the ratio of DNA to Mini-Ph increases, the accessibility of three  
263 lysines in the FCS domain (K1370, K1376, K1380) decreases relative to Mini-Ph alone (Fig. 4C). These  
264 decreases in accessibility are consistent with this region being protected by binding to DNA, and indeed,  
265 K816 of PHC1 (equivalent to K1380 in Ph) was previously identified as a nucleic acid binding residue in  
266 NMR experiments<sup>46</sup> (Supplementary Fig. 12A, B). Changes in accessibility could also reflect changes in  
267 protein conformation, particularly in the HD1, which is not known to bind DNA. The accessibility of the  
268 three lysines in the linker region is low, and does not significantly change with addition of DNA. This is  
269 consistent with the linker being in a collapsed state (Supplementary Fig. 4), although the low number of  
270 lysines in the linker limits the resolution of the analysis. The accessibility of lysines in the SAM is low  
271 both with and without DNA, with no significant changes (Fig. 4C).

272 To validate global changes in accessibility, we also compared average accessibility of all lysines  
273 in each domain under the different conditions (Supplementary Fig. 11C). This confirms the reduction in  
274 accessibility of the HD1 and FCS under conditions where condensates form, and no change in the  
275 accessibility of the SAM (Supplementary Fig. 11C). These data are consistent with the SAM maintaining  
276 its folded structure and pre-existing polymeric state on binding DNA and in condensates. Prolonged  
277 incubation in sulfo-NHS-acetate leads to dissolution of condensates (Supplementary Fig. 12 A-C), likely by  
278 disrupting binding of Mini-Ph to DNA. Indeed, if Mini-Ph is fully acetylated with sulfo-NHS-acetate, it  
279 does not bind DNA, and does not form condensates with DNA (Supplementary Fig. 12 D-F).

280 We then compared accessibility of lysines in Mini-Ph to that in Mini-Ph EH, which does not form  
281 polymers. The pattern of lysine accessibility in Mini-Ph EH is distinct from that of Mini-Ph, and  
282 differences are not restricted to the SAM (Fig. 4D). Three lysines in the HD1, one in the FCS, and one in

283 the SAM are significantly altered in Mini-Ph EH versus Mini-Ph. When differences are considered over  
284 each domain, they are more striking (Fig. 4E). While the overall accessibility of the HD1 is the same  
285 between the two, probably because both increases and decreases in accessibility are observed, the FCS  
286 is less accessible in Mini-Ph EH than in Mini-Ph. while the linker and the SAM are more accessible (Fig.  
287 4D-F). The accessibility of the SAM is consistent with the expected monomeric state of Mini-Ph EH and  
288 the positions of the lysines in the SAM polymer structure (Fig. 4F). However, the differences in the other  
289 domains of Mini-Ph EH versus Mini-Ph indicate that SAM polymerization likely affects the whole  
290 conformation of Mini-Ph and the interactions available for phase separation. The changes in the HD1  
291 both on condensate formation and between Mini-Ph and Mini-Ph EH also raise the possibility that this  
292 domain contributes interactions to phase separation, which will need to be directly tested. Whether Ph  
293 SAM would also affect the conformation of Ph in the context of the full length protein, or when it is in  
294 PRC1 (an interaction mediated by the HD1) remains to be determined. Finally, we attempted to analyze  
295 lysine accessibility in Mini-Ph EH condensates (Supplementary Fig. 13), but the condensates dissolved  
296 within 5 min. of adding the acetylation reagent. 5 min. of acetylation results in most of the protein being  
297 inaccessible (Supplementary Fig. 13 C, D). After 15 min. of acetylation, accessibility is similar with and  
298 without DNA (Supplementary Fig. 13E), consistent with DNA binding being completely disrupted.  
299 Comparison of Mini-Ph EH alone after 5 min. or 15 min. of acetylation indicates that the linker and SAM  
300 are increasingly acetylated with time (Supplementary Fig. C, F). This is consistent with SAM-SAM and/or  
301 linker-SAM interactions (Supplementary Fig. 10), although other explanations are possible.

302  
303 **Ph SAM Polymerization affects the mobility of Mini-Ph in condensates.** The experiments presented  
304 above indicate that Ph SAM polymerization increases the DNA binding affinity of Mini-Ph (Fig. 3C),  
305 increases the driving forces for phase separation (Fig. 3F-J, Supplementary Fig. 8, 9), and changes the  
306 accessibility of Mini-Ph (Fig. 4). To determine whether the polymeric state of Mini-Ph also affects the  
307 material properties of condensates, we compared Mini-Ph and Mini-Ph EH mobility in condensates  
308 formed with chromatin (Supplementary Fig. 14). In side-by-side experiments, recovery of fluorescence is  
309 consistently faster with Mini-Ph EH (Supplementary Fig. 14 A, C, D). We fit FRAP data to a double  
310 exponential function. The T1/2 for both slow populations is lower for Mini-Ph EH than for Mini-Ph the %  
311 of molecules in the fast fraction is higher for Mini-Ph EH than for Mini-Ph, and the mobile fractions are  
312 similar for both (Supplementary Fig. 14 G-J). To analyze chromatin mobility, we analyzed the Cy3 label  
313 on H2A in same condensates used to collect FRAP traces for Alexa-647 labelled Mini-Ph or Mini-Ph EH  
314 before and after bleaching (Supplementary Fig. 14 B, E, F). Less than 10% of the fluorescence is  
315 recovered over the 5 min. experiment for condensates formed with Mini-Ph and Mini-Ph EH  
316 (Supplementary Fig. 13B). Thus, consistent with Fig. 2, chromatin and Mini-Ph or Mini-Ph EH have  
317 distinct kinetics in condensates. The slow kinetics of chromatin may be intrinsic to the template since  
318 the EH mutation in Mini-Ph does not affect them. We conclude that assembly of Mini-Ph into polymers  
319 not only increases the driving force for phase separation, but influences the material properties of the  
320 condensates that are formed.

321  
322 **Mini-Ph-chromatin condensates recruit PRC1 from nuclear extracts.** One function of phase separation  
323 is to create biochemical compartments that are enriched for specific components, and can stimulate or  
324 inhibit biochemical reactions. To determine whether Mini-Ph-chromatin condensates can create unique  
325 biochemical compartments, we asked whether condensates can recruit proteins from nuclear extracts  
326 (Fig. 5A). We prepared nuclear extracts from *Drosophila* S2R+ cells, and used an anion exchange resin to

327 deplete nucleic acids from the extracts. Even after depletion, the nuclear extracts contain substantial  
328 amounts of RNA (Supplementary Fig. 15A). Treatment of extracts with RNaseA resulted in precipitation  
329 of most of the protein from the extracts, so that we used extracts containing RNA for our experiments.  
330 Chromatin alone forms a few tiny structures in extracts (Fig. 5B, C, reaction 1). Mini-Ph does not form  
331 condensates in buffer (e.g. Fig. 1C), but does form small condensates in extracts, likely by binding to  
332 RNA, since the condensates stain with YOYO-1 (Fig. 5B, C, reaction 2). When Mini-Ph is incubated with  
333 chromatin to form condensates, and then nuclear extracts are added, the condensates are preserved,  
334 although they are smaller than condensates in equivalent reactions incubated in buffer (Fig. 5B, C,  
335 compare reactions 3 and 4). Although the condensates are smaller, the concentration of chromatin in  
336 them is similar to that in condensates incubated in buffer (Fig. 5D). We do not know why the  
337 condensates are smaller after incubation in nuclear extracts. Post-translational modifications can  
338 influence phase separation<sup>57</sup>, but the small molecule substrates needed for enzymes that mediate them  
339 should be depleted in our desalted extracts. The presence of nucleic acids, in the extracts could disrupt  
340 condensates, analogous to what is observed at high concentrations of DNA (Supplementary Fig. 2F, G).  
341 Alternatively, proteins in the extracts that bind to Mini-Ph and/or chromatin may disrupt interactions  
342 required for condensates.

343 We used low speed centrifugation (2 min. @ 2500\*g) to isolate condensates and analyzed their  
344 nucleic acid content on agarose gels. When Mini-Ph is incubated with extract in the absence of  
345 chromatin, the pelleted condensates contain RNA (Fig. 5E). When Mini-Ph is incubated with chromatin,  
346 and extract added subsequently, the isolated condensates contain both chromatin and RNA (Fig. 5E).  
347 Since the amount of RNA that is pelleted with Mini-Ph is similar with and without chromatin, we infer  
348 that Mini-Ph condensates in extracts can contain *both* RNA and chromatin (Fig. 5E-G). To confirm this,  
349 we analyzed co-localization of fluorescently labelled Mini-Ph with chromatin after incubation in buffer,  
350 or in nuclear extracts (Supplementary Fig. 15 B-D). Most Mini-Ph-containing structures also contain  
351 chromatin. This is consistent with chromatin condensates recruiting RNA from the extracts, rather than  
352 formation of a separate class of Mini-Ph-RNA condensates.

353 To analyze the protein components of Mini-Ph condensates in nuclear extracts, we used  
354 Western blotting. PRC1 components are enriched in condensates formed in extracts with or without  
355 chromatin, while the PRC2 subunits Su(Z)12 and p55, the single strand DNA binding protein RPA70, and  
356 the chromatin remodeling complex subunit ACF1 are not enriched (Fig. 5H, I). Thus, Mini-Ph  
357 condensates can concentrate endogenous PRC1 provided by nuclear extracts.

358  
359 **Mini-Ph-chromatin condensates enhance ubiquitylation of histone H2A.** To determine whether the  
360 PRC1 recruited to Mini-Ph condensates is active, we tested whether chromatin present in condensates is  
361 ubiquitylated on histone H2A. When extracts were supplied with ATP and ubiquitin, very low levels of  
362 ubiquitylated H2A (H2A-Ub) were detected. Addition of the E1 ubiquitin activating enzyme and E2  
363 ubiquitin conjugating enzyme along with ATP and ubiquitin resulted in detectable H2A-Ub in extracts  
364 (Fig. 6A, B). Formation of Mini-Ph-chromatin condensates prior to incubation in extracts increased H2A-  
365 Ub by about two-fold. This suggests the PRC1 recruited to condensates is functional, and that Mini-Ph-  
366 chromatin condensates enhance the ubiquitylation reaction (Fig. 6B, C).

367 To determine if the Ph SAM polymerization state can influence condensate formation in the  
368 more physiological environment of nuclear extracts, we prepared condensates with Mini-Ph ML, or  
369 Mini-Ph EH, and added nuclear extracts to them. Mini-Ph ML condensates behave similar to those  
370 formed with Mini-Ph in extracts (Supplementary Fig. 16). In contrast, incubation of Mini-Ph EH



371 condensates in extracts transforms them into diffuse structures that occupy a larger area but have a  
372 reduced chromatin concentration relative to condensates incubated in buffer (Supplementary Fig. 16).  
373 We tested histone ubiquitylation in extracts in the presence of Mini-Ph ML or Mini-Ph EH, and find that  
374 neither mutant stimulates histone ubiquitylation (Fig. 6B, C). We do not know if this is because the  
375 condensates formed by the polymerization mutants have different properties (e.g. Supplementary Fig.  
376 14), or because they recruit less PRC1, as would be expected if SAM-SAM interactions (between Mini-Ph  
377 and Ph in PRC1) are directly involved in recruiting PRC1 to chromatin.

378 The observation that Mini-Ph condensates increase histone ubiquitylation might reflect the  
379 increased concentration of PRC1 in condensates (Fig. 5H, I). It is not necessarily predicted, however, that  
380 the environment of condensates, in which chromatin is compacted, would enhance enzyme activity.  
381 Thus to determine whether Mini-Ph-chromatin condensates enhance PRC1 activity under optimal  
382 conditions, we reconstituted the ubiquitylation reaction *in vitro*, using chromatin alone or Mini-Ph-  
383 chromatin condensates as the substrate (Supplementary Fig. 17). We used PRC1 $\Delta$ Ph for these  
384 experiments (Supplementary Fig. 1B), which can interact with Mini-Ph via the HD1 domain (but unlike  
385 PRC1 found in extracts, not via SAM-SAM interactions), and is fully active as an E3 ligase. PRC1 $\Delta$ Ph  
386 catalyzes formation of H2A-Ub on chromatin in a dose dependent manner (Fig. 6D; Supplementary Fig.  
387 17C, D). When Mini-Ph-chromatin condensates are used as the substrate, the activity of PRC1 $\Delta$ Ph is  
388 increased by about two-fold over the entire titration, indicating that condensates stimulate PRC1 $\Delta$ Ph  
389 activity (Fig. 6D, E). We also analyzed condensates at the end of the reactions to confirm that they  
390 persist under reaction conditions (Fig. 6F, G). Because a high fraction of the histones is ubiquitylated in  
391 these experiments (Fig. 6D, E), these results indicate that H2A-Ub does not disrupt condensates.

392  
393 **Ph SAM affects ubiquitylation of H2A *in vivo*.** To test whether the activity of Ph SAM is important for  
394 histone ubiquitylation *in vivo*, we used *Drosophila* S2 cell lines that express Ph or Ph with the strong ML  
395 mutation (L1547R/H1552R), which disrupts Ph SAM polymerization as effectively as the EH mutant used in  
396 our *in vitro* studies, under control of an inducible promoter<sup>14</sup>. We isolated histones from control S2 cells  
397 and cells induced to overexpress Ph or Ph-ML, and measured levels of H2A-Ub (Fig. 7A-D). Cells  
398 overexpressing Ph have an approximately two-fold increase in overall H2A-Ub relative to control cells  
399 (Fig. 7B). Cells overexpressing Ph-ML have increased H2A-Ub in some experiments, but this difference  
400 was not significant, even though Ph-ML is expressed at higher levels than Ph (Fig. 7A, C).

401 Because we find that Ph SAM polymerization activity is not strictly required for phase separation  
402 *in vitro*, we wondered if Ph-ML might be able to phase separate *in vivo*, particularly when present at  
403 high concentrations. Formation of highly concentrated foci in cells is consistent with phase separation,  
404 although it can arise through other mechanisms, as has been pointed out<sup>35</sup>. To test whether Ph-ML can  
405 form foci in cells, we transiently transfected *Drosophila* S2 cells with Venus-tagged Ph, Ph-ML, or  
406 Ph $\Delta$ SAM under control of the heat shock promoter. After heat shock induction, Venus-Ph forms large,  
407 round, bright foci. These foci are mainly (although not exclusively) nuclear, and little Venus signal is  
408 observed in the nucleoplasm outside the foci (Fig. 7E). In contrast, Venus-Ph $\Delta$ SAM is uniformly  
409 distributed in the nucleus, and does not form foci (Fig. 7F). Venus-Ph-ML forms foci but is also  
410 distributed throughout the nucleus (Fig. 7G). Thus, foci formation *in vivo* and phase separation *in vitro*  
411 are correlated with each other and with enhanced histone ubiquitylation. We tested Venus-Mini-Ph in  
412 *Drosophila* S2 R+ cells, and find that, unlike Venus-Ph, it does not form foci in most cells. In about 7% of  
413 the cells, it forms a single focus, which can be quite large (Supplementary Fig. 18 A, B, D); these unusual  
414 foci are not observed with Venus-Mini-Ph $\Delta$ SAM (Supplementary Fig. 18C, D). Thus, although Ph SAM is



415 required for foci formation in cells, the other disordered regions of Ph shape its behavior in cells as been  
416 observed for other proteins that can undergo LLPS<sup>57</sup>.

417

418 **Discussion:** We have identified phase separation as a new activity of the Ph SAM, the domain that is  
419 most clearly implicated in large-scale chromatin organization by PcG proteins. Our data are consistent  
420 with two possible functions of Ph SAM-dependent phase separation: 1) formation of a compacted yet  
421 fluid chromatin state; 2) creating unique biochemical compartments that enhance PRC1-mediated  
422 histone modification.

423

424 **Phase separation by Ph SAM does not strictly require its polymerization activity.** In developing  
425 *Drosophila* embryos, Ph lacking the SAM cannot rescue any Ph functions, while Ph with a polymerization  
426 interface mutated can partially rescue Ph function, although with defects in transcriptional repression<sup>20</sup>.  
427 *In vitro*, Mini-Ph lacking the SAM does not form phase-separated condensates, while Mini-Ph with the  
428 polymerization interface mutated (Mini-Ph EH) does form condensates although they are smaller. In  
429 *Drosophila* tissue culture cells, Ph lacking the SAM does not form foci, while polymerization defective Ph  
430 (Ph-ML) can form foci when overexpressed (Fig. 7). Thus, foci formation *in vivo*, and phase separation *in*  
431 *vitro* are correlated with full Ph function, and the LLPS activity of Ph SAM may be the critical function of  
432 the SAM that remains even when polymerization is disrupted.

433

434 Previous work, implicates Ph polymerization in both transcription repression and chromatin  
435 organization<sup>5,13,14,20,21</sup>. Stochastic Optical Reconstruction Microscopy (STORM) analysis of PcG proteins  
436 in normal *Drosophila* tissue culture cells or those that mildly overexpress Ph or Ph-ML showed that  
437 normal *Drosophila* tissue culture cells contain hundreds of nanoscale PcG clusters, although only a few  
438 large PcG bodies are visible by conventional microscopy<sup>14</sup>. Mild overexpression of Ph increased the  
439 number but not the size of clusters, and increased long-range contacts, while overexpression of the  
440 strong Ph-ML mutant disrupted clusters and reduced long-range contacts. This work and work in  
441 mammalian cells<sup>13</sup> directly implicates Ph SAM polymerization in the nanoscale organization of PcG  
442 proteins and large-scale organization of chromatin.

443 Although Ph SAM alone can form open-ended polymers, the extent to which long SAM polymers  
444 occur in the context of the full protein is unclear. *In vitro*, the oligomeric state of Mini-Ph is limited to  
445 four to six units<sup>5</sup>; this can be explained by the action of the unstructured linker that separates Ph SAM  
446 from the FCS in conjunction with the helical configuration of SAM polymers<sup>18</sup>. Steric considerations  
447 suggest Ph SAM polymerization may be even further restricted in the context of PRC1. Thus, the  
448 contribution of polymerization to LLPS may be much subtler than would occur with an actual open-  
449 ended Ph SAM polymer. The linker connecting the SAM to the FCS is not conserved in Ph homologues  
450 (Supplementary Fig. 4). The linker of PHC3, unlike the *Drosophila* Ph linker<sup>5</sup>, does not bind the PHC3  
451 SAM *in trans*<sup>50</sup>, and allows much more extensive SAM polymerization than that of Ph<sup>50</sup>. It is therefore  
452 possible that the linker has been tuned across evolution to control polymerization and its interplay with  
453 phase separation. This is consistent with modeling based analysis indicating that the properties of  
454 linkers connecting interacting domains tune phase separation properties<sup>48</sup>. Two other PcG proteins,  
455 SCM and Sfmtb, also have SAMs, and the three SAMs have been shown to co-assemble<sup>58</sup>; joining of  
456 SAM-mediated polymers of these three proteins could allow formation of large and diverse polymers.  
457 Evaluating the phase separation activity of these other PcG SAMs, alone or in combination, and of Ph  
458 homologues, will be an important future goal.

459 The phase separation activity of Ph SAM is also likely subject to negative regulation. A  
460 disordered, serine/threonine rich sequence adjacent to the HD1 undergoes O-linked glycosylation  
461 mediated by the PcG protein Sxc<sup>20,59</sup>. This region, and Sxc, are both important for Ph function in  
462 regulation of some genes<sup>20,59</sup>. In the absence of glycosylation, Ph undergoes SAM-dependent “non-  
463 productive aggregation”, which is not alleviated by mutating the Ph SAM polymerization interfaces<sup>20</sup>. It  
464 is possible that “non-productive aggregation” in fact reflects SAM-dependent phase separation (or  
465 maturation of phase-separated protein into stable, insoluble aggregates)<sup>23</sup>. The glycosylated sequence  
466 is not part of Mini-Ph. Mini-Ph is produced in *E. coli*, and is not glycosylated, yet Mini-Ph is soluble. It  
467 therefore seems likely that the effect of glycosylation, although dependent on Ph SAM, also involves  
468 other sequences in Ph. We speculate that the glycosylated region may restrict Ph SAM-mediated phase  
469 separation, and preliminary *in vitro* data support this idea (unpublished observation).

470  
471 A hallmark of LLPS is that it depends on weak, multivalent interactions that allow rapid  
472 reorganization and unrestricted stoichiometry. The polymerization activity of Ph SAM may contribute  
473 multivalent interactions. However, additional interactions are required, which (at least in Mini-Ph)  
474 involve the HD1 and/or the FCS. Based on the comparison between Mini-Ph and Mini-Ph EH, linker-SAM  
475 and (possibly) SAM-SAM interactions that do not require an intact polymerization interface likely also  
476 contribute (Supplementary Fig. 10). *In vitro*, dynamic SAM polymerization is not likely to directly drive  
477 phase separation by Mini-Ph because the K<sub>d</sub> for polymerization is so much lower than the saturation  
478 concentration at which phase separation occurs. However, in the polymerization mutants, and *in vivo*  
479 where the concentration of Ph is lower<sup>52,60</sup>, dynamic polymerization of Ph SAM could control phase  
480 separation. In LLPS of Mini-Ph with chromatin or DNA, the role of the FCS is likely nucleic acid binding;  
481 however, the HD1 and/or the FCS may form additional protein-protein interactions (Fig. 4). It is  
482 interesting to note that Sfmtb and SCM, the other two SAM containing proteins also contain an FCS,  
483 although the distance and additional motifs separating the FCS from the SAM varies. The combination of  
484 an FCS (i.e. a nucleic acid binding domain) and a SAM could allow these proteins also to undergo phase  
485 separation. In support of this idea, the *C. elegans* SOP-2 protein functions as a PcG protein<sup>61</sup>, and forms  
486 large nuclear bodies<sup>62</sup>. Although it is not a clear sequence homologue of Ph, SOP-2 consists of an RNA  
487 binding motif, an intrinsically disordered region (IDR), and a SAM<sup>63</sup>. Recently, the IDR of SOP-2 was  
488 shown to undergo LLPS *in vitro*, induced by crowding agents or RNA<sup>41</sup>. Addition of the SAM to the IDR  
489 still allowed LLPS, but resulted in formation of smaller condensates that showed lower recovery in FRAP  
490 experiments<sup>41</sup>.

491  
492 A model for the function of Ph SAM that can reconcile the seemingly different requirements for  
493 the SAM and its polymerization activity in different contexts is that Ph SAM drives at least three  
494 different states. First, Ph SAM polymerization activity may drive formation of tiny PcG clusters that  
495 mediate local repression of transcription simply through cooperative binding interactions. This is  
496 consistent with our finding that Ph SAM and its polymerization activity increases the DNA binding  
497 affinity of Mini-Ph, at concentrations well below the range where phase separation occurs (Fig. 3). It is  
498 also consistent with the dependence of Ph repressive activity when targeted to a reporter gene on Ph  
499 SAM polymerization activity<sup>5</sup>. Second, bridging of nucleosomes mediated by the polymerization  
500 interfaces of Ph SAM associated with chromatin bound PRC1 may drive collapse of the chromatin  
501 polymer over larger regions of PRC1 bound chromatin<sup>14,44,64,65</sup>. Indeed, a model of this process could  
502 explain the observed effects of overexpressing Ph with the strong ML mutation or wild-type Ph, which

503 increases the number but not size of Ph clusters<sup>14</sup>. In cases where the local concentration of Ph is very  
504 high, Ph may undergo LLPS mediated by multivalent interactions among Ph molecules and between Ph  
505 and chromatin (or Ph and RNA), as captured by our *in vitro* assays, and possibly, in the foci observed  
506 when Venus-Ph is overexpressed in cells (Fig. 7). Which mechanism dominates in any situation could be  
507 modulated by the local concentration of PcG proteins (i.e. how strong a PcG recruitment site is, or the  
508 density of recruitment sites). This could be analogous to the distinction between enhancers and super-  
509 enhancers, which recruit higher levels of transcription factors and co-factors and where LLPS is believed  
510 to occur<sup>34,66</sup>. There is also no reason at this time to exclude hybrid models<sup>54</sup>. For example, LLPS could be  
511 a mechanism to create biochemical compartments, and within these domains, strict SAM-SAM  
512 interactions could establish precise chromatin contacts required for gene repression. LLPS may also  
513 represent an extreme and transient state, used to silence large chromatin domains rapidly during  
514 development<sup>12,67</sup>, or as a step in re-establishing gene expression patterns during the cell cycle. All of  
515 these possibilities remain to be tested, but the separation of phase separation and polymerization  
516 activity revealed by our simple *in vitro* assays may provide a means to do so.

517

518 Many proteins with diverse localizations and functions have SAMs. Some SAMs have been  
519 shown to polymerize in a concentration dependent manner, while others require additional recruitment  
520 mechanisms to induce polymerization. The SAMs of a subset of proteins, including Ets1, Fli1, and p63<sup>68</sup>,  
521 have not been observed to polymerize. It is therefore possible that phase separation is a property of the  
522 SAM that is distinct from polymerization, a hypothesis that is testable by measuring the phase  
523 separation activity of proteins with monomeric SAMs.

524

525 **Ph SAM and histone ubiquitylation.** We find that Ph SAM driven chromatin condensates can enhance  
526 PRC1-mediated histone ubiquitylation. We do not know what the mechanism of stimulation of H2A-Ub  
527 is. It is unlikely to be concentration of the reaction components in condensates because all of the  
528 components (except PRC1ΔPh) are present at saturating concentrations in these reactions. PRC1ΔPh  
529 binds chromatin tightly (Kd for 150 bp DNA is  $\leq 1$  nM<sup>69</sup>) so that Mini-Ph is also not needed to recruit  
530 PRC1ΔPh to chromatin. Although further experiments will be needed to determine the mechanism, the  
531 environment of condensates may stimulate steps in the reaction subsequent to substrate binding, which  
532 could include the actual ubiquitin transfer or steps affecting processivity<sup>70</sup>. It has recently been shown  
533 that H2A-Ub mediated by PRC1 is stimulated by chromatin compaction<sup>71</sup>, and that spreading of H2B-Ub  
534 along chromatin is facilitated by formation of structured, phase-separated compartments by the  
535 ubiquitylation machinery<sup>72</sup>, which may be relevant to our observations. Formation of protein-chromatin  
536 condensates with the heterochromatin protein HP1 alters the conformation of the nucleosome,  
537 rendering specific regions of the histone proteins more accessible<sup>73</sup>. It is possible that nucleosome  
538 conformation is also changed in Mini-Ph condensates, and that these changes facilitate histone  
539 ubiquitylation. Detailed characterization of chromatin in condensates will be an important future goal.

540 Stimulation of H2A-Ub is unlikely to be the essential function of the Ph SAM in *Drosophila*, since  
541 the modification is not required for PRC1-dependent gene repression *in vivo*, including repression of  
542 genes that depend on Ph SAM<sup>74,75</sup>. However, H2A-Ub is required for full development<sup>74,75</sup>. *Drosophila*  
543 cPRC1 also does not seem to mediate most H2A-Ub in tissue culture cells, and it is likely that another  
544 ncPRC1 containing L3(73)Ah, a homologue of mammalian Pcgf3, in place of PSC, is present in these cells  
545<sup>76</sup>. This also means that in our experiments with nuclear extracts, although we observe PRC1 recruitment

546 to condensates, we cannot be certain that it is responsible for the ubiquitylation activity we observe  
547 (Fig. 6).

548 Histone ubiquitylation by PRC1 has been most intensively studied in mouse embryonic stem  
549 cells (mESCs), where systematic analysis of the effect of disrupting PRC1 subunits implicates ncPRC1 (i.e.  
550 non PHC-containing) in creation of most H2A-Ub<sup>7-9</sup>. However, using an artificial tethering system that  
551 allows PcG proteins to be reversibly targeted to a reporter gene so that persistent effects on chromatin  
552 and gene expression (i.e. memory) can be measured, Moussa et al.<sup>77</sup> found that heritable gene  
553 repression and propagation of H2A-Ub depend on cPRC1. Recent work indicates a central role for H2A-  
554 Ub in PcG-dependent gene regulation in mESCs<sup>78,79</sup>, in seeming contrast with observations in  
555 *Drosophila*; it will be interesting to determine how Ph SAM contributes to H2A-Ub activity in mammals.  
556 The ability of Ph SAM to condense chromatin and to promote H2A-Ub could be important for rapidly  
557 building PcG chromatin domains, or restoring them at the end of mitosis. H2A-Ub is not detected on  
558 mitotic chromosomes in mammalian cells<sup>80,81</sup>, suggesting it is re-acquired after cells exit mitosis.

559 Finally, Cbx2, a member of some mammalian canonical (PHC-containing) PRC1s, which has a  
560 strong chromatin compacting activity<sup>82</sup>, has also been shown to form phase separated condensates with  
561 chromatin *in vitro*, and to form 1,6-hexanediol-sensitive foci in ES cells<sup>40,42</sup>. This phase separation  
562 activity is mediated by a charged IDR in Cbx2 that is important for the developmental function of Cbx2  
563<sup>83</sup>. Further, as shown in Supplementary Fig. 17, Mini-Ph does not form foci in cells, indicating that other  
564 sequences in Ph, all of which are predicted to be disordered, can regulate the activity of the Ph SAM.  
565 How the activity of Ph SAM is regulated by other sequences in Ph and coordinated with that of other  
566 components of PRC1, particularly that of PSC which has a powerful chromatin compacting activity  
567 analogous to that of Cbx2<sup>84</sup>, is an important question for future study.

568

#### 569 **Methods:**

570 **Cloning:** Cloning of Mini-Ph and the polymerization mutants was described previously<sup>5</sup>. Mini-Ph $\Delta$ SAM  
571 (residues 1291 – 1507) and Mini-Ph $\Delta$ FCS (residues 1397 – 1577) were cloned into a modified pET-3c  
572 vector expressing a leader sequence containing a hexahistidine tag followed by a TEV cleavage site. To  
573 express Venus-tagged proteins in S2 cells, Ph, Ph-ML, or Ph $\Delta$ SAM were first cloned into a house-  
574 modified gateway donor vector and full sequences confirmed. LR recombination was used with pHVW  
575 from the DGRC (stock # 1089) to produce the final expression plasmids.

576

#### 577 **Protein purification:**

578 **Mini-Ph:** His-tagged Mini-Ph, Mini-Ph-EH, and Mini-Ph-ML were expressed in Rosetta (DE3) *E. coli*.  
579 Cultures were grown at 37°C to an OD of 0.8-1.0, and then shifted to 15°C for overnight induction with  
580 1mM IPTG. Cells were pelleted, flash frozen, and stored at -80°C. Cells were resuspended in 2 ml/g lysis  
581 buffer (50 mM Tris, pH 8.5, 200 mM NaCl, 10 mM  $\beta$ -ME, 100  $\mu$ M ZnCl<sub>2</sub>, 0.2 mM PMSF, 0.5 mM  
582 Benzamidine). Cells were incubated on ice for 10 min, flash frozen in liquid nitrogen, thawed at 37°C,  
583 and sonicated 6\*30 sec. at 30% intensity. Freeze-thaw and sonication were repeated, and the lysate  
584 centrifuged for 1 hour at 100,000\*g and 4°C. Cleared lysate was sonicated 6\*30" at 40% intensity, and  
585 filtered through a 22  $\mu$ m filter. Lysate (from 1 L) was applied to a 1 ml His-Trap column using an AKTA  
586 FPLC, and eluted with a gradient of imidazole (from 10-300 mM) in lysis buffer. Fractions with Mini-Ph  
587 were dialyzed overnight against 1 L of 20 mM Tris, pH 8.5, 50 mM NaCl, 100  $\mu$ M ZnCl<sub>2</sub>, and 10 mM  $\beta$ -ME.  
588 Dialyzed fractions were centrifuged for 10 min. at 20,800\*g, and loaded on a 1 ml HiTrapQ-HP column  
589 and eluted with a gradient from 50 mM to 1 M NaCl in binding buffer. Fractions were pooled and

590 dialyzed overnight into 20 mM Tris, pH8, 50 mM NaCl, 10  $\mu$ M ZnCl<sub>2</sub>, 1 mM  $\beta$ ME, aliquotted and stored at  
591 -80. In some cases, Mini-Ph was further purified by size exclusion chromatography on a Superose 12 size  
592 exclusion column.

593 **Mini-Ph $\Delta$ SAM and Mini-Ph $\Delta$ FCS:** Both proteins were expressed in BL21 (DE3) Gold cells pre-  
594 transformed with the pRARE plasmid. The transformed cells were grown at 37°C in LB media to an OD<sub>600</sub>  
595 of ~0.7 – 0.8 and induced overnight at 15°C. Cells harvested from 1 L of culture were resuspended with  
596 10 ml of lysis buffer (50 mM Tris pH 8.0, 200 mM NaCl, 5 mM  $\beta$ ME, 30 mM imidazole pH 7.5, 1 mM  
597 PMSF) and lysed by sonication. The soluble lysates were introduced onto an Ni-NTA column, washed  
598 with lysis buffer (without PMSF), and bound proteins eluted using 300 mM imidazole, 200 mM NaCl, 5  
599 mM  $\beta$ ME. The leader sequence was cleaved using TEV protease, and the cleaved sequence and  
600 uncleaved proteins removed by passing through a Ni-NTA column. Further purification was performed  
601 using a HiTrap Q-HP column. Fractions containing protein were pooled, buffer exchanged into 50 mM  
602 Tris pH 8.0, 100 mM NaCl, 5 mM  $\beta$ ME, and concentrated. Mini-Ph $\Delta$ SAM was further purified on a  
603 Superdex 200 size exclusion column in 50 mM Tris pH 8.0, 100 mM NaCl, 5 mM  $\beta$ ME. Purified,  
604 concentrated proteins were stored at -80°C

605 **E1, E2, and His-Ub:** The following plasmids were used: human 6X-His-UBA1 (E1) (pET21d-Ube1,  
606 addgene #34965), Human UbcH5c (E2) (pET28a-UbcH5c, addgene # 12643), 6XHis-Ubiquitin (pET15b-  
607 His-Ub) (kind gift of B. Schulman). Proteins were expressed in *E. coli* and purified essentially as described  
608 <sup>85,86</sup>. His-Ube1 was purified by Ni-NTA affinity followed by Superdex 200 chromatography <sup>85</sup>. UbcH5c  
609 was purified on a HiTrap SP-XL column followed by Superdex 200 <sup>86</sup>. 6X-His-Ub was purified by Ni-NTA  
610 chromatography.

611 **Histone purification:** *Xenopus laevis* histones, including H2B-122C mutant were expressed in and  
612 purified from *E. coli*, as described <sup>87,88</sup>. All experiments were carried out with histone H3 with Cys110  
613 (the only cysteine natively present in the histones) mutated to Ala.

614 Fluorescent labeling of histone H2A with NHS-Cy3 was carried out under conditions favouring  
615 labeling of the N-terminal amine. Lyophilized H2A was resuspended in labeling buffer (20 mM Hepes, pH  
616 6.2, 7 M Guanidium-HCl, 5 mM EDTA) to a concentration of 0.1 mM. NHS-Cy3 stock (in DMF) was added  
617 to a final ratio of 0.5:1 (dye to histone) and incubated at room temp. for 90 min. Free dye was removed  
618 with Amicon concentrators, after diluting with labeling buffer without Guanidium to reduce the Gu-HCl  
619 concentration to 6 M. In some cases, Zeba columns were used instead to remove free dye. To label H2B-  
620 122C with maleimide-Alexa 647, lyophilized histone was reconstituted in denaturing labeling buffer (20  
621 mM Tris-HCl, pH 7.0, 7 M guanidium HCl, 5 mM EDTA) to a final concentration of 0.1 mM followed by  
622 treatment with a 100-fold excess of TCEP for 30 minutes. Maleimide-Alexa 647 was added to a final ratio  
623 of 3:1 (dye:histone) and incubated for 3 hours at room temp. The labeling reaction was quenched with  
624  $\beta$ -ME (final concentration 80 mM), and free dye removed as above. Octamer reconstitutions and  
625 purification on a Superdex 200 size exclusion column were carried out as described <sup>87,88</sup>. Concentrated  
626 octamers were dialyzed into octamer refolding buffer (2 M NaCl, 10 mM Tris, pH 7.5, 1 mM EDTA, 5 mM  
627  $\beta$ -ME) with 50% glycerol and stored at -80°C.

628 **PRC1 $\Delta$ Ph:** PRC1 $\Delta$ Ph was purified from nuclear extracts of baculovirus-infected Sf9 cells essentially as  
629 described previously <sup>69</sup>, with the following changes. Nuclear extracts were prepared from Sf9 cells  
630 infected with viruses for the three subunits (Flag-PSC, Pc, dRING) but nuclei were purified through a  
631 sucrose cushion prior to nuclear extraction. During the purification, the 2 M KCl wash in the published  
632 protocol was replaced with a wash consisting of BC2000N + 1 M Urea (20 mM Hepes, pH 7.9, 2.0 mM  
633 EDTA, 2 M KCl, 1 M deionized urea, 0.05% NP40, no glycerol). Additionally, prior to eluting the protein,



634 anti-FLAG beads were incubated 3-5 volumes of BC300N with 4 mM ATP + 4 mM MgCl<sub>2</sub> for 30 min. at  
635 room temperature. This step reduces the amount of HSC-70 that co-purifies with PRC1ΔPh. Protein was  
636 eluted with 0.4 mg/ml FLAG in BC300 without NP40, concentrated to ~1 mg/ml and stored in BC300N  
637 (20 mM Hepes, pH 7.9, 300 mM KCl, 0.2 mM EDTA, 20% glycerol, 0.05% NP40).

638

639 **Fluorescent labelling and acetylation of Mini-Ph and other proteins:** To fluorescently label proteins,  
640 NHS-ester-Cy3 or Alexa-647 were used to randomly label lysines. A Zeba column (Thermo Fisher) was  
641 used to buffer exchange the protein into 20 mM Hepes, pH 7.9, 200 mM NaCl for Mini-Ph, or BC300N for  
642 proteins expressed in Sf9 cells; labeling was carried out with a 0.5:1 (dye:protein) ratio for 15 min. at  
643 room temp. Labelling was quenched by addition of Lysine to 10 mM. Free dye was removed using two  
644 Zeba columns, which were equilibrated in the labeling buffer with 200 mM NaCl. Labelled protein was  
645 mixed with unlabelled at a ratio of 1 to 25 for imaging experiments. Acetylation of Mini-Ph was carried  
646 out exactly as for fluorescent labelling except that a ratio of 8:1 sulfo-NHS-acetate:lysine residues in  
647 Mini-Ph was used and labeling was carried out for 1 hour at room temp.

648

649 **Preparation of Nuclear Extracts from *Drosophila* S2R+ cells:** S2R+ cells were grown in M3-BYPE media  
650 with 10% FBS. 20\*15 cm dishes were used to prepare nuclear extracts as described<sup>89</sup>, except that nuclei  
651 were purified through a sucrose cushion prior to extraction. Cells lysed in hypotonic buffer were layered  
652 over two volumes of 30% sucrose in hypotonic buffer, and centrifuged 18' @ 1400\*g. Nuclei were  
653 washed once in hypotonic buffer, and extracted as described. The high salt extraction buffer was 1.2 M  
654 KCl, and extracts were not dialyzed. To use the extracts to treat condensates, up to 100 μl of extract was  
655 buffer exchanged into 20 mM Tris, pH 8, 50 mM NaCl using a Zeba column. Extracts were centrifuged 2'  
656 @ 20,000\*g and incubated for 15' on ice with 60% volume of Q-sepharose. Extracts were spun through  
657 an empty column (2' @ 10,000\*g), and then centrifuged 2' @ 20,000 \*g. All procedures were carried out  
658 on ice or at 4°C and contained protease inhibitors and 0.4X PhosStop phosphatase inhibitor.

659

660 **Chromatin preparation:** Most experiments were carried out with the plasmid p5S\*8, which contains 5  
661 blocks of 8-5S nucleosome positioning sequences (repeat length 208 base pairs). Plasmids were  
662 assembled by salt gradient dialysis as described<sup>90</sup>. Chromatin was finally dialyzed into HEN (10 mM  
663 Hepes, pH 7.9, 0.25 mM EDTA, 10 mM NaCl) buffer and stored at 4°C. To measure chromatin assembly,  
664 100 ng of each assembly was digested overnight with 10 U of EcoRI in NEB buffer 2.1, and loaded on a  
665 0.5X TBE, 5% acrylamide native gel. Gels were stained with Ethidium bromide and imaged on a Typhoon  
666 imager. For quantification, the nucleosomal signal is multiplied by 2.5 to account for the quenching  
667 effect of bound protein on ethidium bromide<sup>91</sup>. For Micrococcal nuclease analysis, 800-1000 ng of  
668 chromatin was diluted into 40 μl of the following buffer: 12 mM Hepes, pH 7.9, 0.12 mM EDTA, 60 mM  
669 KCl, 2 mM MgCl<sub>2</sub> and split into 4 tubes. Micrococcal nuclease (Sigma, #N3755) (0.5 U/μl in 50 mM Tris,  
670 pH 8, 0.05 mM CaCl<sub>2</sub>, 50% glycerol) was diluted 1:18, 1:54, 1:162, and 1:486 in MNase dilution buffer  
671 (50 mM Tris, pH8, 10 mM NaCl, 126 mM CaCl<sub>2</sub>, 5% glycerol). 1 μl of each dilution was used to digest  
672 chromatin for 7 min. at room temp. Reactions were stopped with DSB-PK (10X stock: 50 mM Tris, pH  
673 8.0, 0.1 M EDTA, 1% SDS, 25% glycerol + 10 mg/ml Proteinase K), digested overnight at 50°C, and  
674 analyzed on 1X TBE-1.5% agarose (SeaKem) gels which were stained with Ethidium bromide and imaged  
675 on a Typhoon Imager.

676



677 **Phase separation assays:** Proteins and templates were routinely centrifuged full speed in a microfuge  
678 for 2-5 min. at 4°C to remove aggregates before setting up phase separation assays. For phase  
679 separation assays, reactions (10-20µl) were assembled in a 384-well glass-bottom imaging dish  
680 (SensioPlate, Greiner Bio-One). Wells were not pre-treated; pre-coating with BSA did not influence phase  
681 separation by Mini-Ph. Phase separation was initiated by addition of the protein or the DNA, and mixing  
682 the reaction by gentle pipetting, with care taken not to introduce air. Reactions were incubated in the  
683 dark for 15 min. or up to several hours. For reactions where YOYO-1 (Thermo Fisher) was used, it was  
684 added at the beginning of the reaction to a final dilution of 1:3000. Typical reaction conditions are 50  
685 mM NaCl or 50 mM KCl, 20 mM Tris pH8. Reactions were set up on ice, and transferred to room temp.  
686 for 15 min. Turbidity measurements were made in duplicate using a NanoDrop spectrophotometer.  
687 Phase separated condensates were pelleted by centrifugation at 14,000\*g for 2 min. at 4°C, and  
688 supernatants removed to fresh tubes. Pellets were resuspended in 12 µl 1.5X SDS-Sample buffer, and 6X  
689 SDS-Sample Buffer was added to the supernatant. 10% of the pellet and supernatant were removed and  
690 digested in DSB-PK for 2 hours at 50°C for DNA analysis. The remainder of the sample was boiled and  
691 analyzed by SDS-PAGE.

692

693 **Imaging of condensates:** All images were collected on a Zeiss microscope, equipped with a Yokogawa  
694 CSU-1 spinning disc confocal head. Zen 2012 software was used for image acquisition with a 63X oil  
695 objective, or a 100X oil objective (for movies and FRAP) and evolve EMCCD camera from Photometrics.  
696 The excitation wave length for YOYO/Venus, Cy3/RFP and Alexa 647 were 488, 561 and 639 nm  
697 respectively

698 **Measuring nucleosome concentration in condensates:** Images were collected at 25% laser power, 200  
699 msec exposure for buffer, chromatin alone, a titration of labelled histone octamers (in octamer refolding  
700 buffer, which contains 2M NaCl, and in which histone octamers remain assembled), and Mini-Ph  
701 chromatin condensates. Histones are the same histones used to prepare the chromatin; 43% of the  
702 histone octamers are labelled (measured both using the NanoDrop and by loading histones and free dye  
703 on SDS-PAGE gels), corresponding to a 21.5% labeling efficiency on H2A (since there are two copies of  
704 H2A in each octamer). Image J “measure” was used to measure the mean grey intensity for each of 9  
705 images for each point. Images were manually checked and images with bright artifacts removed,  
706 although these had little impact on the measured intensities. A linear regression was fit to the  
707 calibration curve and used to convert measured intensities to nucleosome concentrations. To measure  
708 intensities in condensates, Image J was used to threshold the images (AutoThreshold-->Li); Analyze  
709 Particles was used to measure the mean grey intensity in each thresholded structure. Particle size was  
710 set as 100-infinity pixels. The mean grey intensity from the buffer image was subtracted from all  
711 measurements, which were converted to nucleosome concentrations using the calibration curve.

712 **FRAP:** FRAP experiments were carried out with Alexa-647 labelled Mini-Ph or Mini-Ph EH. Bleaching was  
713 done with a 595 nm laser, for 1500 msec. This effectively bleaches both Alexa-647 Mini-Ph, and Cy3-  
714 H2A, although we were only able to record FRAP images from one channel. Two pre-bleach images were  
715 collected, followed by an image every 5 or 10 sec. All FRAP analysis of Mini-Ph was done by bleaching  
716 single complete structures. Images were analyzed in Image J (Fiji). An ROI was selected for the bleach  
717 area, background, and a non-bleached structure. Background subtracted, normalized data were fit with  
718 a double exponential fit using GraphPad Prism 8.

719  $Y=Y_0 + \text{SpanFast} * (1 - \exp(-K_{\text{Fast}} * X)) + \text{SpanSlow} * (1 - \exp(-K_{\text{Slow}} * X))$ . We excluded data sets that could not  
720 be fit, and obvious technical artifacts (e.g. if a drop fuses with the bleached condensate during the  
721 experiment).

722

723 **Image analysis of condensates:** Images for display were prepared using Zen2 (blue edition). For  
724 quantification, images were exported as TIFs from Zen (original data). ImageJ (Fiji) was used to threshold  
725 the images (Li algorithm); thresholds were manually checked and images with too few structures to  
726 threshold were removed. Areas of thresholded structures were measured using ImageJ (“Analyze  
727 Particles”, size=10-infinity pixel), and intensities using Analyze Particles. For colocalization analysis, the  
728 GDSC-->Colocalization-->Particle Overlap was used. Masks were created in the Alexa 647 (Mini-Ph) and  
729 Cy3 (chromatin) channels, and overlap of Cy3 with Mini-Ph structures measured.

730 Movies were created from .czi files in ImageJ (Fiji). Movies were saved as .avi files at 1, 2, or 3  
731 frames per second, and using PNG compression.

732

733 **Filter binding:** Filter binding was carried out as described<sup>69,92</sup>. Briefly, a 150 bp internally labelled DNA  
734 probe was prepared by PCR and gel purified. The probe was used at 0.02 nM. Reaction conditions were  
735 60 mM KCl, 12 mM Hepes, pH7.9, 0.24 mM EDTA, 4% glycerol, in a 20  $\mu$ l volume. Proteins were  
736 centrifuged 2 min. at full speed in a microfuge before preparing the dilution series. Binding reactions  
737 were incubated 1 hour at room temperature. Hybond-XL was used as the bottom membrane (binds  
738 DNA), and was pre-equilibrated in 0.4 M Tris, pH 8. Nitrocellulose was used as the top membrane (binds  
739 protein + DNA), and was pre-treated with 0.4 M KOH for 10 min., neutralized by washing through  
740 several changes of Milli-Q water, and equilibrated for at least 1 hour in binding buffer. Filters were  
741 assembled in a 48-well slot-blot apparatus, and each well washed with 100  $\mu$ l binding buffer. The  
742 vacuum was turned off, and reactions loaded on the filters. Slots were immediately washed with 2\*100  
743  $\mu$ l binding buffer. Filters were air dried, exposed to a phosphoimager screen, and scanned on a Typhoon.  
744 ImageQuant was used to quantify top (bound) and bottom (unbound) filters, and fraction bound  
745 calculated in Excel. Curve fitting was done in GraphPad Prism 8, using the following equation:

$$746 Y = AB_{\text{max}} * X / (X + K_d) + b$$

747

748 **Protein footprinting assay:** The acetylation footprinting assay is described in detail in Kang et al.<sup>6</sup>. Phase  
749 separation reactions were directly scaled up to use 4  $\mu$ g of protein for each sample. Condensates were  
750 allowed to form at room temp. for 15 min.; an aliquot of each sample was removed to confirm phase  
751 separation using microscopy. Sulfo-NHS-acetate was dissolved immediately before use, and added to a  
752 final concentration of 0.5 mM. An aliquot of each sample was removed to monitor phase separation by  
753 microscopy, and reactions were stopped after 15 min. by addition of Trifluoroacetic acid to a final  
754 concentration of 1%. For Mini-Ph EH, acetylation of condensates was restricted to 5 min. because these  
755 condensates dissolved rapidly on exposure to Sulfo-NHS-acetate. We therefore analyzed Mini-Ph EH  
756 alone, and bound to DNA (16X DNA, Fig. 4) after both 5 and 15 min. of acetylation. Samples were TCA  
757 precipitated, denatured with 8 M urea, reduced with DTT (45 mM final concentration), treated with a  
758 final concentration of 10 mM Iodoacetamide, and diluted 1:2 with H<sub>2</sub>O before treating with Propionic  
759 anhydride twice. Samples were dried, treated with Propionic anhydride again, dried, resuspended and  
760 digested sequentially with Trypsin and Chymotrypsin. Samples were purified with a ZipTip and analyzed  
761 by LC-MS/MS on an Orbitrap-Fusion mass spectrometer.

762 Mass Spectrometry data were analyzed using Maxquant (v 1.6.10.43) with Acetyl(K) and  
763 Propionylation(K) as variable modifications. 10 missed cleavages were allowed since lysine modification  
764 will block trypsin digest. All data files were analyzed together, with the “match between runs” option.  
765 Intensities for identified Acetyl and Propionyl sites were used for quantification. Accessibility was  
766 calculated (in Excel) as (intensity acetylated)/(intensity acetylated+intensity prop +0.5) for each site. To  
767 compare accessibility between samples, GraphPad Prism 8 was used to conduct student’s t-test,  
768 assuming equal variance across samples, and with the Holm-Sidak method of correction for multiple  
769 comparisons, with alpha=0.05 (unpaired, 2-tailed test). Heat maps were prepared from averaged  
770 accessibilities using Morpheus (<https://software.broadinstitute.org/morpheus>).

771

772 **Analysis of condensates after incubation in nuclear extracts:** Phase separation reactions were set up in  
773 40 µl with 80 nM nucleosomes, 7.5 µM Mini-Ph, in 20 mM Tris pH 8.0 and 50 mM NaCl. After incubating  
774 10 min. at room temp., 12 µl of nuclear extracts were added, and reactions mixed by gently pipetting up  
775 and down. 7.5 µl were removed and diluted to 10 µl for imaging, and 7.5 µl mixed with the  
776 ubiquitylation machinery to assay histone ubiquitylation. After 60 min. of total incubation, samples  
777 were pelleted by centrifugation for 2 min. at 2500\*g, 4°C. Supernatants were removed and SDS-sample  
778 buffer added to 1X. Pellets were resuspended in 2X SDS sample buffer. 2 µl of each pellet and  
779 supernatant were removed and digested with Proteinase K for at least 1 hour at 55°C before analysis on  
780 1.2% agarose, 1X TAE gels, which were stained with SYBR Gold to visualize nucleic acids. The remainder  
781 of the samples were boiled and loaded on 8% SDS-PAGE gels, transferred to nitrocellulose, and used for  
782 Western blotting. Membranes were blocked with 5% nonfat dry milk in PBST (PBS + 0.3% Tween-20),  
783 and incubated with primary antibodies diluted in 5% milk-PBST overnight at 4°C. Membranes were  
784 washed 3\*10 min. in PBST, incubated in secondary antibody diluted in 5% milk-PBST for 1-2 hours,  
785 washed 3\*10 min. in PBST, and visualized using a Li-Cor Odyssey imaging system. Image J (Fiji) was used  
786 to quantify band intensities.

787

788 **Histone Ubiquitylation assays:** For ubiquitylation assays, 125 ng chromatin per 5 µl was pre-incubated  
789 with 5 µM Mini-Ph (or buffer) for 15 min. at room temp. to induce phase separation, followed by  
790 addition of the ubiquitylation machinery and PRC1ΔPh. Final reaction conditions are 40 nM  
791 nucleosomes, 20 mM Hepes, pH 7.9, 0.25 mM MgCl<sub>2</sub>, 0.25 mM ATP, 0.6 mM DTT, 60 mM KCl, 25mM  
792 NaCl, 700 nM E1, 800 nM E2, and 500 ng Ub. Titrations of the E1, E2, and His-Ub indicate that none are  
793 limiting under these conditions. Reactions were further incubated for 45 min. at room temp. Aliquots  
794 were removed for imaging, and the remainder of the reaction stopped by addition of SDS-Sample buffer.  
795 Boiled samples were loaded on 16% SDS-PAGE gels, which were scanned for Cy3 to detect H2A, and  
796 then stained with SYPRO Ruby. Histone ubiquitylation assays in nuclear extracts were carried out under  
797 the same conditions except that the pre-incubation of chromatin with Mini-Ph was 10 min., nuclear  
798 extracts were added just before the ubiquitylation components, and reactions were incubated for 80  
799 min. at room temp.

800

801 **Cell culture:** Wild type S2 cells (from Expression Systems) and S2 cell lines harbouring stable Ph or Ph-ML  
802 <sup>14</sup>transgenes were grown in suspension in ESF-921 media with 5% FBS. Protein expression was induced  
803 with 0.5 µM CuSO<sub>4</sub> for 4 days. For whole cell extracts, cells were resuspended in 2X-SDS sample buffer  
804 and boiled. For histone extraction, we followed the protocol of Abcam  
805 (<https://www.abcam.com/protocols/histone-extraction-protocol-for-western-blot>); HDAC inhibitors

806 were not included. Western blots were carried out as described above, and ImageQuant was used to  
807 quantify bands.

808 **Live cell imaging:** For live cell imaging, S2 (Fig. 7), or S2R+ (Supplementary Fig. 17) cells were plated at  
809  $10^6$  cells per well in 6-well plates the night before transfection. Transfection was carried out using Trans-  
810 IT lipid (Mirus), according to the manufacturer's protocol. 2  $\mu$ g of each Venus-Ph construct was used  
811 along with 0.5  $\mu$ g of pAct5C-H2A-RFP<sup>93</sup>. One to two days after transfection, cells were replated on ConA-  
812 coated imaging dishes (Ibidi). Heat shock was for 8 min. (S2R+) or 12 min. (S2) at 37°C, and cells were  
813 analyzed within 24 hours of protein induction. Confocal stacks of thick slices (3  $\mu$ m) were collected on  
814 the spinning disc microscope described above using the 63X objective to capture foci throughout the  
815 cell.

816 **Image analysis of live cells:** The .czi files of image stacks were opened in Image J (Fiji), converted to  
817 maximum intensity projections, and the channels split. The red channel (H2A-RFP) was used to segment  
818 nuclei as follows. Images were thresholded with the Li algorithm, followed by removing outliers less  
819 than 5 pixels, and 3 rounds of erosion. Thresholded images were converted to masks, processed with a  
820 watershed algorithm, and "Analyze Particles" used with a size threshold of 200-infinity pixels to select  
821 nuclei. The green channel (YFP fusion proteins) was then processed with "Find maxima" with the  
822 following parameters: Prominence: 20000; strict; exclude edge maxima; output type: single points. The  
823 nuclei selected from the red channel were used as ROIs, and the # maxima per ROI (i.e. # foci/nucleus)  
824 obtained using Measure in the ROI tool, followed by dividing the raw integrated density by 255. This  
825 entire pipeline is explained here: <https://microscopy.duke.edu/guides/count-nuclear-foci-ImageJ>. To  
826 compare the # foci per cell, cells with zero foci were excluded; since Venus-Ph $\Delta$ SAM does not form foci,  
827 the majority of cells were excluded.

828

829

830

831 **Data Availability:** Mass spectrometry raw files will be uploaded to MassIVE. The Source Data file  
832 includes data for FRAP traces (Fig. 2, Supplementary Fig. 14) and MaxQuant output (intensities) for  
833 acetylation footprinting experiments (Fig. 4), filter binding data (Fig. 3C), nucleosome and condensate  
834 measurements (Fig. 3H, I, J), western blot quantification (Fig. 5I, 7C, D), ubiquitylation activity (Fig. 6E),  
835 foci measurements (Fig. 7H). All other raw data are available on reasonable request.

836

837

838

839

840 **References:**

- 841 1 Di Croce, L. & Helin, K. Transcriptional regulation by Polycomb group proteins. *Nat Struct Mol*  
842 *Biol* **20**, 1147-1155, doi:10.1038/nsmb.2669 (2013).
- 843 2 Entrevan, M., Schuettengruber, B. & Cavalli, G. Regulation of Genome Architecture and Function  
844 by Polycomb Proteins. *Trends Cell Biol* **26**, 511-525, doi:10.1016/j.tcb.2016.04.009 (2016).
- 845 3 Kassis, J. A., Kennison, J. A. & Tamkun, J. W. Polycomb and Trithorax Group Genes in Drosophila.  
846 *Genetics* **206**, 1699-1725, doi:10.1534/genetics.115.185116 (2017).
- 847 4 Loubiere, V., Martinez, A. M. & Cavalli, G. Cell Fate and Developmental Regulation Dynamics by  
848 Polycomb Proteins and 3D Genome Architecture. *Bioessays* **41**, e1800222,  
849 doi:10.1002/bies.201800222 (2019).
- 850 5 Robinson, A. K. *et al.* The growth-suppressive function of the polycomb group protein  
851 polyhomeotic is mediated by polymerization of its sterile alpha motif (SAM) domain. *J Biol Chem*  
852 **287**, 8702-8713, doi:10.1074/jbc.M111.336115 (2012).
- 853 6 Kang, J. J., Faubert, D., Boulais, J. & Francis, N. J. DNA Binding Reorganizes the Intrinsically  
854 Disordered C-Terminal Region of PSC in Drosophila PRC1. *J Mol Biol*,  
855 doi:10.1016/j.jmb.2020.07.002 (2020).
- 856 7 Fursova, N. A. *et al.* Synergy between Variant PRC1 Complexes Defines Polycomb-Mediated  
857 Gene Repression. *Mol Cell* **74**, 1020-1036 e1028, doi:10.1016/j.molcel.2019.03.024 (2019).
- 858 8 Scelfo, A. *et al.* Functional Landscape of PCGF Proteins Reveals Both RING1A/B-Dependent-and  
859 RING1A/B-Independent-Specific Activities. *Mol Cell* **74**, 1037-1052 e1037,  
860 doi:10.1016/j.molcel.2019.04.002 (2019).
- 861 9 Gao, Z. *et al.* PCGF homologs, CBX proteins, and RYBP define functionally distinct PRC1 family  
862 complexes. *Mol Cell* **45**, 344-356, doi:10.1016/j.molcel.2012.01.002 (2012).
- 863 10 Pemberton, H. *et al.* Genome-wide co-localization of Polycomb orthologs and their effects on  
864 gene expression in human fibroblasts. *Genome Biol* **15**, R23, doi:10.1186/gb-2014-15-2-r23  
865 (2014).
- 866 11 Francis, N. J., Kingston, R. E. & Woodcock, C. L. Chromatin compaction by a polycomb group  
867 protein complex. *Science* **306**, 1574-1577, doi:10.1126/science.1100576 (2004).
- 868 12 Cheutin, T. & Cavalli, G. Loss of PRC1 induces higher-order opening of Hox loci independently of  
869 transcription during Drosophila embryogenesis. *Nat Commun* **9**, 3898, doi:10.1038/s41467-018-  
870 05945-4 (2018).
- 871 13 Isono, K. *et al.* SAM domain polymerization links subnuclear clustering of PRC1 to gene silencing.  
872 *Dev Cell* **26**, 565-577, doi:10.1016/j.devcel.2013.08.016 (2013).
- 873 14 Wani, A. H. *et al.* Chromatin topology is coupled to Polycomb group protein subnuclear  
874 organization. *Nat Commun* **7**, 10291, doi:10.1038/ncomms10291 (2016).
- 875 15 Boettiger, A. N. *et al.* Super-resolution imaging reveals distinct chromatin folding for different  
876 epigenetic states. *Nature* **529**, 418-422, doi:10.1038/nature16496 (2016).
- 877 16 Eskeland, R. *et al.* Ring1B compacts chromatin structure and represses gene expression  
878 independent of histone ubiquitination. *Mol Cell* **38**, 452-464, doi:10.1016/j.molcel.2010.02.032  
879 (2010).
- 880 17 Boyle, S. *et al.* A central role for canonical PRC1 in shaping the 3D nuclear landscape. *Genes Dev*  
881 **34**, 931-949, doi:10.1101/gad.336487.120 (2020).
- 882 18 Kim, C. A., Gingery, M., Pilpa, R. M. & Bowie, J. U. The SAM domain of polyhomeotic forms a  
883 helical polymer. *Nat Struct Biol* **9**, 453-457, doi:10.1038/nsb802 (2002).
- 884 19 Kim, C. A. & Bowie, J. U. SAM domains: uniform structure, diversity of function. *Trends Biochem*  
885 *Sci* **28**, 625-628, doi:10.1016/j.tibs.2003.11.001 (2003).



- 886 20 Gambetta, M. C. & Muller, J. O-GlcNAcylation prevents aggregation of the Polycomb group  
887 repressor polyhomeotic. *Dev Cell* **31**, 629-639, doi:10.1016/j.devcel.2014.10.020 (2014).
- 888 21 Tsuboi, M. *et al.* Ubiquitination-Independent Repression of PRC1 Targets during Neuronal Fate  
889 Restriction in the Developing Mouse Neocortex. *Dev Cell* **47**, 758-772 e755,  
890 doi:10.1016/j.devcel.2018.11.018 (2018).
- 891 22 Cheutin, T. & Cavalli, G. Progressive polycomb assembly on H3K27me3 compartments generates  
892 polycomb bodies with developmentally regulated motion. *PLoS Genet* **8**, e1002465,  
893 doi:10.1371/journal.pgen.1002465 (2012).
- 894 23 Banani, S. F., Lee, H. O., Hyman, A. A. & Rosen, M. K. Biomolecular condensates: organizers of  
895 cellular biochemistry. *Nat Rev Mol Cell Biol* **18**, 285-298, doi:10.1038/nrm.2017.7 (2017).
- 896 24 Boeynaems, S. *et al.* Protein Phase Separation: A New Phase in Cell Biology. *Trends Cell Biol* **28**,  
897 420-435, doi:10.1016/j.tcb.2018.02.004 (2018).
- 898 25 Shin, Y. & Brangwynne, C. P. Liquid phase condensation in cell physiology and disease. *Science*  
899 **357**, doi:10.1126/science.aaf4382 (2017).
- 900 26 Strom, A. R. & Brangwynne, C. P. The liquid nucleome - phase transitions in the nucleus at a  
901 glance. *J Cell Sci* **132**, doi:10.1242/jcs.235093 (2019).
- 902 27 Fay, M. M. & Anderson, P. J. The Role of RNA in Biological Phase Separations. *J Mol Biol* **430**,  
903 4685-4701, doi:10.1016/j.jmb.2018.05.003 (2018).
- 904 28 Gibson, B. A. *et al.* Organization of Chromatin by Intrinsic and Regulated Phase Separation. *Cell*  
905 **179**, 470-484 e421, doi:10.1016/j.cell.2019.08.037 (2019).
- 906 29 Huo, X. *et al.* The Nuclear Matrix Protein SAFB Cooperates with Major Satellite RNAs to Stabilize  
907 Heterochromatin Architecture Partially through Phase Separation. *Mol Cell* **77**, 368-383 e367,  
908 doi:10.1016/j.molcel.2019.10.001 (2020).
- 909 30 Larson, A. G. *et al.* Liquid droplet formation by HP1alpha suggests a role for phase separation in  
910 heterochromatin. *Nature* **547**, 236-240, doi:10.1038/nature22822 (2017).
- 911 31 Maeshima, K. *et al.* Nucleosomal arrays self-assemble into supramolecular globular structures  
912 lacking 30-nm fibers. *EMBO J* **35**, 1115-1132, doi:10.15252/embj.201592660 (2016).
- 913 32 Strom, A. R. *et al.* Phase separation drives heterochromatin domain formation. *Nature* **547**, 241-  
914 245, doi:10.1038/nature22989 (2017).
- 915 33 Wang, L. *et al.* Histone Modifications Regulate Chromatin Compartmentalization by Contributing  
916 to a Phase Separation Mechanism. *Mol Cell* **76**, 646-659 e646, doi:10.1016/j.molcel.2019.08.019  
917 (2019).
- 918 34 Hnisz, D., Shrinivas, K., Young, R. A., Chakraborty, A. K. & Sharp, P. A. A Phase Separation Model  
919 for Transcriptional Control. *Cell* **169**, 13-23, doi:10.1016/j.cell.2017.02.007 (2017).
- 920 35 McSwiggen, D. T., Mir, M., Darzacq, X. & Tjian, R. Evaluating phase separation in live cells:  
921 diagnosis, caveats, and functional consequences. *Genes Dev* **33**, 1619-1634,  
922 doi:10.1101/gad.331520.119 (2019).
- 923 36 Boija, A. *et al.* Transcription Factors Activate Genes through the Phase-Separation Capacity of  
924 Their Activation Domains. *Cell* **175**, 1842-1855 e1816, doi:10.1016/j.cell.2018.10.042 (2018).
- 925 37 Sabari, B. R. *et al.* Coactivator condensation at super-enhancers links phase separation and gene  
926 control. *Science* **361**, doi:10.1126/science.aar3958 (2018).
- 927 38 Kilic, S. *et al.* Phase separation of 53BP1 determines liquid-like behavior of DNA repair  
928 compartments. *EMBO J* **38**, e101379, doi:10.15252/embj.2018101379 (2019).
- 929 39 Oshidari, R. *et al.* DNA repair by Rad52 liquid droplets. *Nat Commun* **11**, 695,  
930 doi:10.1038/s41467-020-14546-z (2020).
- 931 40 Plys, A. J. *et al.* Phase separation of Polycomb-repressive complex 1 is governed by a charged  
932 disordered region of CBX2. *Genes Dev* **33**, 799-813, doi:10.1101/gad.326488.119 (2019).



- 933 41 Qu, W., Wang, Z. & Zhang, H. Phase separation of the *C. elegans* Polycomb protein SOP-2 is  
934 modulated by RNA and sumoylation. *Protein Cell*, doi:10.1007/s13238-019-00680-y (2020).
- 935 42 Tatavosian, R. *et al.* Nuclear condensates of the Polycomb protein chromobox 2 (CBX2)  
936 assemble through phase separation. *J Biol Chem* **294**, 1451-1463, doi:10.1074/jbc.RA118.006620  
937 (2019).
- 938 43 Shin, Y. *et al.* Liquid Nuclear Condensates Mechanically Sense and Restructure the Genome. *Cell*  
939 **175**, 1481-1491 e1413, doi:10.1016/j.cell.2018.10.057 (2018).
- 940 44 Erdel, F. *et al.* Mouse Heterochromatin Adopts Digital Compaction States without Showing  
941 Hallmarks of HP1-Driven Liquid-Liquid Phase Separation. *Mol Cell* **78**, 236-249 e237,  
942 doi:10.1016/j.molcel.2020.02.005 (2020).
- 943 45 Hodgson, J. W. *et al.* The polyhomeotic locus of *Drosophila melanogaster* is transcriptionally and  
944 post-transcriptionally regulated during embryogenesis. *Mech Dev* **66**, 69-81, doi:10.1016/s0925-  
945 4773(97)00091-9 (1997).
- 946 46 Wang, R. *et al.* Identification of nucleic acid binding residues in the FCS domain of the polycomb  
947 group protein polyhomeotic. *Biochemistry* **50**, 4998-5007, doi:10.1021/bi101487s (2011).
- 948 47 Simpson, R. T., Thoma, F. & Brubaker, J. M. Chromatin reconstituted from tandemly repeated  
949 cloned DNA fragments and core histones: a model system for study of higher order structure.  
950 *Cell* **42**, 799-808, doi:10.1016/0092-8674(85)90276-4 (1985).
- 951 48 Harmon, T. S., Holehouse, A. S., Rosen, M. K. & Pappu, R. V. Intrinsically disordered linkers  
952 determine the interplay between phase separation and gelation in multivalent proteins. *Elife* **6**,  
953 doi:10.7554/eLife.30294 (2017).
- 954 49 Choi, J. M., Holehouse, A. S. & Pappu, R. V. Physical Principles Underlying the Complex Biology of  
955 Intracellular Phase Transitions. *Annu Rev Biophys* **49**, 107-133, doi:10.1146/annurev-biophys-  
956 121219-081629 (2020).
- 957 50 Robinson, A. K. *et al.* Human polyhomeotic homolog 3 (PHC3) sterile alpha motif (SAM) linker  
958 allows open-ended polymerization of PHC3 SAM. *Biochemistry* **51**, 5379-5386,  
959 doi:10.1021/bi3004318 (2012).
- 960 51 Taylor, N. O., Wei, M. T., Stone, H. A. & Brangwynne, C. P. Quantifying Dynamics in Phase-  
961 Separated Condensates Using Fluorescence Recovery after Photobleaching. *Biophys J* **117**, 1285-  
962 1300, doi:10.1016/j.bpj.2019.08.030 (2019).
- 963 52 Fonseca, J. P. *et al.* In vivo Polycomb kinetics and mitotic chromatin binding distinguish stem  
964 cells from differentiated cells. *Genes Dev* **26**, 857-871, doi:10.1101/gad.184648.111 (2012).
- 965 53 Boeynaems, S. *et al.* Spontaneous driving forces give rise to protein-RNA condensates with  
966 coexisting phases and complex material properties. *Proc Natl Acad Sci U S A* **116**, 7889-7898,  
967 doi:10.1073/pnas.1821038116 (2019).
- 968 54 Frank, L. & Rippe, K. Repetitive RNAs as Regulators of Chromatin-Associated Subcompartment  
969 Formation by Phase Separation. *J Mol Biol*, doi:10.1016/j.jmb.2020.04.015 (2020).
- 970 55 Strickfaden, H. *et al.* Condensed chromatin behaves like a solid on the mesoscale in vitro and in  
971 living cells. *bioRxiv*, doi:<https://doi.org/10.1101/2020.05.06.079905> (2020).
- 972 56 Patel, A. *et al.* ATP as a biological hydrotrope. *Science* **356**, 753-756,  
973 doi:10.1126/science.aaf6846 (2017).
- 974 57 Bratek-Skicki, A., Pancsa, R., Meszaros, B., Van Lindt, J. & Tompa, P. A guide to regulation of the  
975 formation of biomolecular condensates. *FEBS J* **287**, 1924-1935, doi:10.1111/febs.15254 (2020).
- 976 58 Alfieri, C. *et al.* Structural basis for targeting the chromatin repressor Sfmtb to Polycomb  
977 response elements. *Genes Dev* **27**, 2367-2379, doi:10.1101/gad.226621.113 (2013).
- 978 59 Gambetta, M. C., Oktaba, K. & Muller, J. Essential role of the glycosyltransferase *sxc/Ogt* in  
979 polycomb repression. *Science* **325**, 93-96, doi:10.1126/science.1169727 (2009).

- 980 60 Bonnet, J. *et al.* Quantification of Proteins and Histone Marks in Drosophila Embryos Reveals  
981 Stoichiometric Relationships Impacting Chromatin Regulation. *Dev Cell* **51**, 632-644 e636,  
982 doi:10.1016/j.devcel.2019.09.011 (2019).
- 983 61 Zhang, H. *et al.* Global regulation of Hox gene expression in *C. elegans* by a SAM domain protein.  
984 *Dev Cell* **4**, 903-915, doi:10.1016/s1534-5807(03)00136-9 (2003).
- 985 62 Zhang, H. *et al.* SUMO modification is required for in vivo Hox gene regulation by the  
986 *Caenorhabditis elegans* Polycomb group protein SOP-2. *Nat Genet* **36**, 507-511,  
987 doi:10.1038/ng1336 (2004).
- 988 63 Zhang, H. *et al.* The *C. elegans* Polycomb gene SOP-2 encodes an RNA binding protein. *Mol Cell*  
989 **14**, 841-847, doi:10.1016/j.molcel.2004.06.001 (2004).
- 990 64 Erdel, F. & Rippe, K. Formation of Chromatin Subcompartments by Phase Separation. *Biophys J*  
991 **114**, 2262-2270, doi:10.1016/j.bpj.2018.03.011 (2018).
- 992 65 Hildebrand, E. M. & Dekker, J. Mechanisms and Functions of Chromosome  
993 Compartmentalization. *Trends Biochem Sci* **45**, 385-396, doi:10.1016/j.tibs.2020.01.002 (2020).
- 994 66 Shrinivas, K. *et al.* Enhancer Features that Drive Formation of Transcriptional Condensates. *Mol*  
995 *Cell* **75**, 549-561 e547, doi:10.1016/j.molcel.2019.07.009 (2019).
- 996 67 Oksuz, O. *et al.* Capturing the Onset of PRC2-Mediated Repressive Domain Formation. *Mol Cell*  
997 **70**, 1149-1162 e1145, doi:10.1016/j.molcel.2018.05.023 (2018).
- 998 68 Kim, C. A. *et al.* Polymerization of the SAM domain of TEL in leukemogenesis and transcriptional  
999 repression. *EMBO J* **20**, 4173-4182, doi:10.1093/emboj/20.15.4173 (2001).
- 1000 69 Francis, N. J., Saurin, A. J., Shao, Z. & Kingston, R. E. Reconstitution of a functional core polycomb  
1001 repressive complex. *Mol Cell* **8**, 545-556, doi:10.1016/s1097-2765(01)00316-1 (2001).
- 1002 70 Taherbhoy, A. M., Huang, O. W. & Cochran, A. G. BMI1-RING1B is an autoinhibited RING E3  
1003 ubiquitin ligase. *Nat Commun* **6**, 7621, doi:10.1038/ncomms8621 (2015).
- 1004 71 Zhao, J. *et al.* RYBP/YAF2-PRC1 complexes and histone H1-dependent chromatin compaction  
1005 mediate propagation of H2AK119ub1 during cell division. *Nat Cell Biol* **22**, 439-452,  
1006 doi:10.1038/s41556-020-0484-1 (2020).
- 1007 72 Gallego, L. D. *et al.* Phase separation directs ubiquitination of gene-body nucleosomes. *Nature*  
1008 **579**, 592-597, doi:10.1038/s41586-020-2097-z (2020).
- 1009 73 Sanulli, S. *et al.* HP1 reshapes nucleosome core to promote phase separation of  
1010 heterochromatin. *Nature* **575**, 390-394, doi:10.1038/s41586-019-1669-2 (2019).
- 1011 74 Gutierrez, L. *et al.* The role of the histone H2A ubiquitinase Sce in Polycomb repression.  
1012 *Development* **139**, 117-127, doi:10.1242/dev.074450 (2012).
- 1013 75 Pengelly, A. R., Kalb, R., Finkl, K. & Muller, J. Transcriptional repression by PRC1 in the absence of  
1014 H2A monoubiquitylation. *Genes Dev* **29**, 1487-1492, doi:10.1101/gad.265439.115 (2015).
- 1015 76 Lee, H. G., Kahn, T. G., Simcox, A., Schwartz, Y. B. & Pirrotta, V. Genome-wide activities of  
1016 Polycomb complexes control pervasive transcription. *Genome Res* **25**, 1170-1181,  
1017 doi:10.1101/gr.188920.114 (2015).
- 1018 77 Moussa, H. F. *et al.* Canonical PRC1 controls sequence-independent propagation of Polycomb-  
1019 mediated gene silencing. *Nat Commun* **10**, 1931, doi:10.1038/s41467-019-09628-6 (2019).
- 1020 78 Blackledge, N. P. *et al.* PRC1 Catalytic Activity Is Central to Polycomb System Function. *Mol Cell*,  
1021 doi:10.1016/j.molcel.2019.12.001 (2019).
- 1022 79 Tamburri, S. *et al.* Histone H2AK119 Mono-Ubiquitination Is Essential for Polycomb-Mediated  
1023 Transcriptional Repression. *Mol Cell*, doi:10.1016/j.molcel.2019.11.021 (2019).
- 1024 80 Wu, R. S., Kohn, K. W. & Bonner, W. M. Metabolism of ubiquitinated histones. *J Biol Chem* **256**,  
1025 5916-5920 (1981).
- 1026 81 Joo, H. Y. *et al.* Regulation of cell cycle progression and gene expression by H2A  
1027 deubiquitination. *Nature* **449**, 1068-1072, doi:10.1038/nature06256 (2007).

1028 82 Grau, D. J. *et al.* Compaction of chromatin by diverse Polycomb group proteins requires localized  
1029 regions of high charge. *Genes Dev* **25**, 2210-2221, doi:10.1101/gad.17288211 (2011).

1030 83 Lau, M. S. *et al.* Mutation of a nucleosome compaction region disrupts Polycomb-mediated axial  
1031 patterning. *Science* **355**, 1081-1084, doi:10.1126/science.aah5403 (2017).

1032 84 Beh, L. Y., Colwell, L. J. & Francis, N. J. A core subunit of Polycomb repressive complex 1 is  
1033 broadly conserved in function but not primary sequence. *Proc Natl Acad Sci U S A* **109**, E1063-  
1034 1071, doi:10.1073/pnas.1118678109 (2012).

1035 85 Berndsen, C. E. & Wolberger, C. A spectrophotometric assay for conjugation of ubiquitin and  
1036 ubiquitin-like proteins. *Anal Biochem* **418**, 102-110, doi:10.1016/j.ab.2011.06.034 (2011).

1037 86 Brzovic, P. S., Lissounov, A., Christensen, D. E., Hoyt, D. W. & Klevit, R. E. A UbcH5/ubiquitin  
1038 noncovalent complex is required for processive BRCA1-directed ubiquitination. *Mol Cell* **21**, 873-  
1039 880, doi:10.1016/j.molcel.2006.02.008 (2006).

1040 87 Dyer, P. N. *et al.* Reconstitution of nucleosome core particles from recombinant histones and  
1041 DNA. *Methods Enzymol* **375**, 23-44, doi:10.1016/s0076-6879(03)75002-2 (2004).

1042 88 Luger, K., Rechsteiner, T. J. & Richmond, T. J. Preparation of nucleosome core particle from  
1043 recombinant histones. *Methods Enzymol* **304**, 3-19, doi:10.1016/s0076-6879(99)04003-3 (1999).

1044 89 Abmayr, S. M., Yao, T., Parmely, T. & Workman, J. L. Preparation of nuclear and cytoplasmic  
1045 extracts from mammalian cells. *Curr Protoc Pharmacol* **Chapter 12**, Unit12 13,  
1046 doi:10.1002/0471141755.ph1203s35 (2006).

1047 90 Lee, K. M., Sif, S., Kingston, R. E. & Hayes, J. J. hSWI/SNF disrupts interactions between the H2A  
1048 N-terminal tail and nucleosomal DNA. *Biochemistry* **38**, 8423-8429, doi:10.1021/bi990090o  
1049 (1999).

1050 91 Carruthers, L. M., Tse, C., Walker, K. P., 3rd & Hansen, J. C. Assembly of defined nucleosomal and  
1051 chromatin arrays from pure components. *Methods Enzymol* **304**, 19-35, doi:10.1016/s0076-  
1052 6879(99)04004-5 (1999).

1053 92 Wong, I. & Lohman, T. M. A double-filter method for nitrocellulose-filter binding: application to  
1054 protein-nucleic acid interactions. *Proc Natl Acad Sci U S A* **90**, 5428-5432,  
1055 doi:10.1073/pnas.90.12.5428 (1993).

1056 93 Kachaner, D. *et al.* Coupling of Polo kinase activation to nuclear localization by a bifunctional NLS  
1057 is required during mitotic entry. *Nat Commun* **8**, 1701, doi:10.1038/s41467-017-01876-8 (2017).

1058 94 Peng, K., Radivojac, P., Vucetic, S., Dunker, A. K. & Obradovic, Z. Length-dependent prediction of  
1059 protein intrinsic disorder. *BMC Bioinformatics* **7**, 208, doi:10.1186/1471-2105-7-208 (2006).

1060  
1061

1062 **Figure Legends:**

1063

1064 **Figure 1 Mini-Ph forms phase separated condensates with chromatin.** A. Schematic of Polyhomeotic-  
1065 proximal and Mini-Ph, which spans aa 1389-1577 and includes the 3 conserved domains and an  
1066 unstructured linker. Grey line indicates predicted disordered sequence (using PONDR-VSL2)<sup>94</sup>. Note that  
1067 91.9% of the sequence is predicted to be disordered (disregarding segments less than 30 amino acids),  
1068 with only the SAM predicted to be ordered. B. Schematic depicting the oligomeric state of Mini-Ph,  
1069 which forms limited polymers of 4-6 units (6 are shown)<sup>5</sup>. C. Structure of nine units of the Ph SAM  
1070 polymer demonstrating its helical architecture. The N-terminus, from which the linker extends, is shown  
1071 in cyan. D, E. Neither chromatin (D), nor Mini-Ph (E) form condensates in buffer. F. Mini-Ph forms phase  
1072 separated condensates with chromatin. G. Time-lapse of droplet fusion of Mini-Ph-chromatin  
1073 condensates, visualized with Alexa 647-labelled Mini-Ph. H. 3D-reconstruction of confocal stack of  
1074 images demonstrating that Mini-Ph-chromatin condensates form a fused layer on the bottom of the  
1075 imaging plate. Scale is in microns. I. Representative images from a matrix of Mini-Ph and chromatin  
1076 showing the relationship between protein and chromatin concentration and condensate formation.  
1077 [nucleosomes] assumes 8 fmol nucleosomes per 1 ng DNA. J. Graph depicting conditions where one-  
1078 phase and two-phases were scored in two experiments like the one shown in I. See also Supplementary  
1079 Figures 1-3 and Supplementary Movies 1-3.

1080

1081

1082 **Figure 2 Mini-Ph chromatin condensates intermix slowly *in vitro* although Mini-Ph is dynamic.** A. FRAP  
1083 experiment demonstrating that Mini-Ph-chromatin condensates exchange Mini-Ph. Structure indicated  
1084 with the arrow was bleached at t=0. B. Representative FRAP traces for Mini-Ph or chromatin (after 28 or  
1085 27 min. of condensate formation, respectively). Data were fit with a double exponential function. For  
1086 Mini-Ph, % fast=25; T1/2<sub>Fast</sub>=30 sec; T1/2<sub>Slow</sub>=199 sec; mobile fraction (plateau)=0.79. For chromatin, %  
1087 fast=19; T1/2<sub>Fast</sub>=21 sec; T1/2<sub>Slow</sub>=289 sec; mobile fraction =0.14. C. Scheme for mixing chromatin  
1088 labelled with different colours before adding Mini-Ph. D. Mini-Ph-chromatin condensates formed with  
1089 an equal mix of Cy3 and Alexa-647-labelled chromatin. E. Mini-Ph-chromatin condensates formed with  
1090 either Cy3 or Alexa-647-labelled chromatin. F. Scheme for mixing Mini-Ph-chromatin condensates  
1091 formed with differently labelled chromatins. G. Mini-Ph-chromatin condensates were formed with Cy3-  
1092 or Alexa 647- labelled chromatin and mixed together. H. Time lapse of fusion of condensates in the  
1093 mixing experiment. See also Supplementary Fig. 6.

1094

1095 **Figure 3 Ph SAM, but not its polymerization activity, is essential for formation of phase-separated**  
1096 **condensates *in vitro*.** A. Schematic diagram of Mini-Ph truncations. B. Structure of the Ph SAM-SAM  
1097 interface indicating the position of the ML and EH mutations that impair SAM polymerization. The EH  
1098 mutation (Leu 1565 Arg) has a stronger effect on polymerization than the single ML mutation (Leu 1547  
1099 Arg). The figure was prepared from the structure of the ML mutant, PDB 1D 1KW4. C. Summary of filter  
1100 binding experiments to measure DNA binding. Points show the mean +/- SEM. D. Kd<sub>app</sub> for each protein.  
1101 E. Both the SAM and the FCS/HD1 region are required for formation of phase-separated condensates  
1102 with chromatin. F. Both the SAM and the FCS/HD1 region are required for formation of phase-separated  
1103 condensates with DNA or induced by crowding agents. G. Representative images of condensates  
1104 formed by Mini-Ph or the polymerization mutants (ML and EH) in the presence of chromatin (1 hour  
1105 incubation). H. The concentration of nucleosomes in condensates formed by wild type (WT) and

1106 polymerization mutants (ML and EH) are similar. I, J. EH forms smaller condensates with chromatin than  
1107 WT Mini-Ph, as determined by measuring the average size of the condensates (I, not significant), or the  
1108 % area covered by condensates (J). p-values for H-J are for one-way ANOVA comparing each sample to  
1109 the WT control, with Dunnett's correction for multiple comparisons. Bars show the mean + SEM of 3  
1110 experiments; 9 images were analyzed for each experiment. See also Supplementary Fig. 7.

1111

1112 **Figure 4 Lysine accessibility in Mini-Ph-DNA condensates.** A. Schematic of lysine footprinting assay.  
1113 Mini-Ph or Mini-Ph EH alone, or in the presence of 1X, 2X, or 16X DNA, is treated with sulfo-NHS acetate  
1114 to acetylate accessible lysines. The protein is denatured and treated with propionic acid to propionylate  
1115 unacetylated lysines. Samples are processed for mass spectrometry, and accessibility is quantified as  
1116 fraction acetylated for each lysine position. B. Mini-Ph-DNA condensates before and after 15 min.  
1117 acetylation reaction. C. Heat map showing accessibility for Mini-Ph alone or with the indicated DNA  
1118 amounts (n=3-6). D. Heat map comparing lysine accessibility in Mini-Ph versus Mini-Ph EH (Mini-Ph n=6;  
1119 Mini-Ph EH n=3). Heat maps are not scaled so that accessibility can be compared across rows and  
1120 column. Asterisks indicate significant differences between samples with and without DNA by two-tailed  
1121 student's t-test with Holm-Sidak correction for multiple comparisons (green=2X DNA vs. no DNA, black  
1122 =16X DNA vs. no DNA; grey=Mini-Ph versus Mini-Ph EH). E. Average accessibility of lysines in each Mini-  
1123 Ph region compared between Mini-Ph and Mini-Ph EH. Accessibility of all residues in each region was  
1124 averaged for each replicate and the averages compared across conditions by student's t-test with Holm-  
1125 Sidak correction for multiple comparisons. F. Structure of the Ph-p SAM polymer (PDB 1D 1KW4) with  
1126 lysine side chains shown and labeled for the central SAM unit. Red highlights residue with significantly  
1127 changed accessibility in Mini-Ph versus Mini-Ph EH. Structural data are not available for the HD1  
1128 residues studied in the footprinting assay. See also Supplementary Fig. 11-13.

1129

1130

1131 **Figure 5 Mini-Ph condensates recruit PRC1 from extracts.** A. Scheme for isolating Mini-Ph-chromatin  
1132 condensates from nuclear extracts. B. Representative images of condensates formed in each of the 4  
1133 indicated reactions. C. Quantification of phase separated condensates (% area covered by condensates,  
1134 9 images analyzed for each of 3 experiments using YOYO-1 staining). p-values are for one-way ANOVA  
1135 with Tukey's correction for multiple comparisons. D. Ratio of average intensity in condensates formed  
1136 by Mini-Ph + chromatin + nuclear extracts (reaction 3) versus Mini-Ph + chromatin (reaction 4) for 3  
1137 experiments. p-value is for one sample t-test comparing the ratio to the expected value of 1. E. SYBR  
1138 Gold stained gel of nucleic acid content of pelleted reactions. Reactions 1-4 are as indicated in panel B  
1139 for C-I. Summary of three experiments quantifying the fraction of the chromatin (F) and RNA (G) in the  
1140 pellet. p-values are for paired t-test between reactions 3 and 4. H. Representative Western blots of one  
1141 experiment analyzing the content of pelleted condensates. Equal amounts of pellet and supernatants  
1142 were loaded. I. Summary of three experiments analyzing the content of condensates formed in extracts.  
1143 Su(Z)12 was only analyzed in two experiments. One-way ANOVA was used to compare all three samples  
1144 for each antibody with Tukey's multiple comparisons test. p<0.05 \*; p<0.01 \*\*. All bar graphs show  
1145 mean, and error bars are SEM. See also Supplementary Fig. 15.

1146

1147 **Figure 6 Mini-Ph condensates facilitate histone ubiquitylation by PRC1.** A. Scheme for carrying out  
1148 ubiquitylation assays in nuclear extracts. B. Representative SDS-PAGE of Cy3-labelled H2A showing  
1149 ubiquitylation of chromatin in nuclear extracts in the presence or absence of Mini-Ph (wild-type), Mini-



1150 Ph ML or Mini-Ph EH. Note that the condensates formed in buffer (reaction 4) were poorly recovered in  
1151 this experiment. C. Quantification of three ubiquitylation assays. Bars are mean + SEM. p-values are for  
1152 one-sample t-test comparing values to expected value of 1. D. Representative SDS-PAGE of Cy3-labelled  
1153 H2A showing ubiquitylation reaction with PRC1 $\Delta$ Ph and chromatin in the presence or absence of Mini-  
1154 Ph. E. Quantification of ubiquitylation reactions; n=3. Points are the mean +/- SEM and data were fit  
1155 with an exponential function. F. Microscopy of Mini-Ph-chromatin condensates at the end of fully  
1156 reconstituted *in vitro* ubiquitylation reactions. G. Fibrous condensates are formed by high  
1157 concentrations of PRC1 $\Delta$ Ph in the absence of Mini-Ph; at lower concentrations, no structures are visible.  
1158 See also Supplementary Fig. 16, 17.

1159  
1160 **Figure 7 Ph with an intact SAM increases H2A-ub *in vivo*.** A. Representative western blot of Ph levels in  
1161 induced cell lines. Note that Ph ML is the strong double mutant (L1547R/H1552R), which was previously  
1162 shown to disrupt Ph clustering in cells<sup>14</sup>. B. Representative Western blot of histone H2A-Ub levels in  
1163 induced cell lines. Blots were re-probed with anti-H3 to normalize loading. 125 and 250 ng of acid  
1164 extracted histones were loaded for each sample. C, D. Quantification of Ph (C) and H2A-Ub (D) for 3  
1165 experiments. p-values are for one-way ANOVA comparing Ph-WT and Ph-ML cells to control (S2) for the  
1166 250 ng point. E-G. Representative images of cells overexpressing YFP-Ph (E), YFP-Ph $\Delta$ SAM (F), or YFP-Ph-  
1167 ML (G). H. Graph of the number of foci per cell for two independent experiments. Note that only cells  
1168 with >zero foci were included. p-values are for Kruskal-Wallis tests with Dunn's multiple comparisons  
1169 correction. Supplementary Fig. 18.

1170  
1171  
1172  
1173



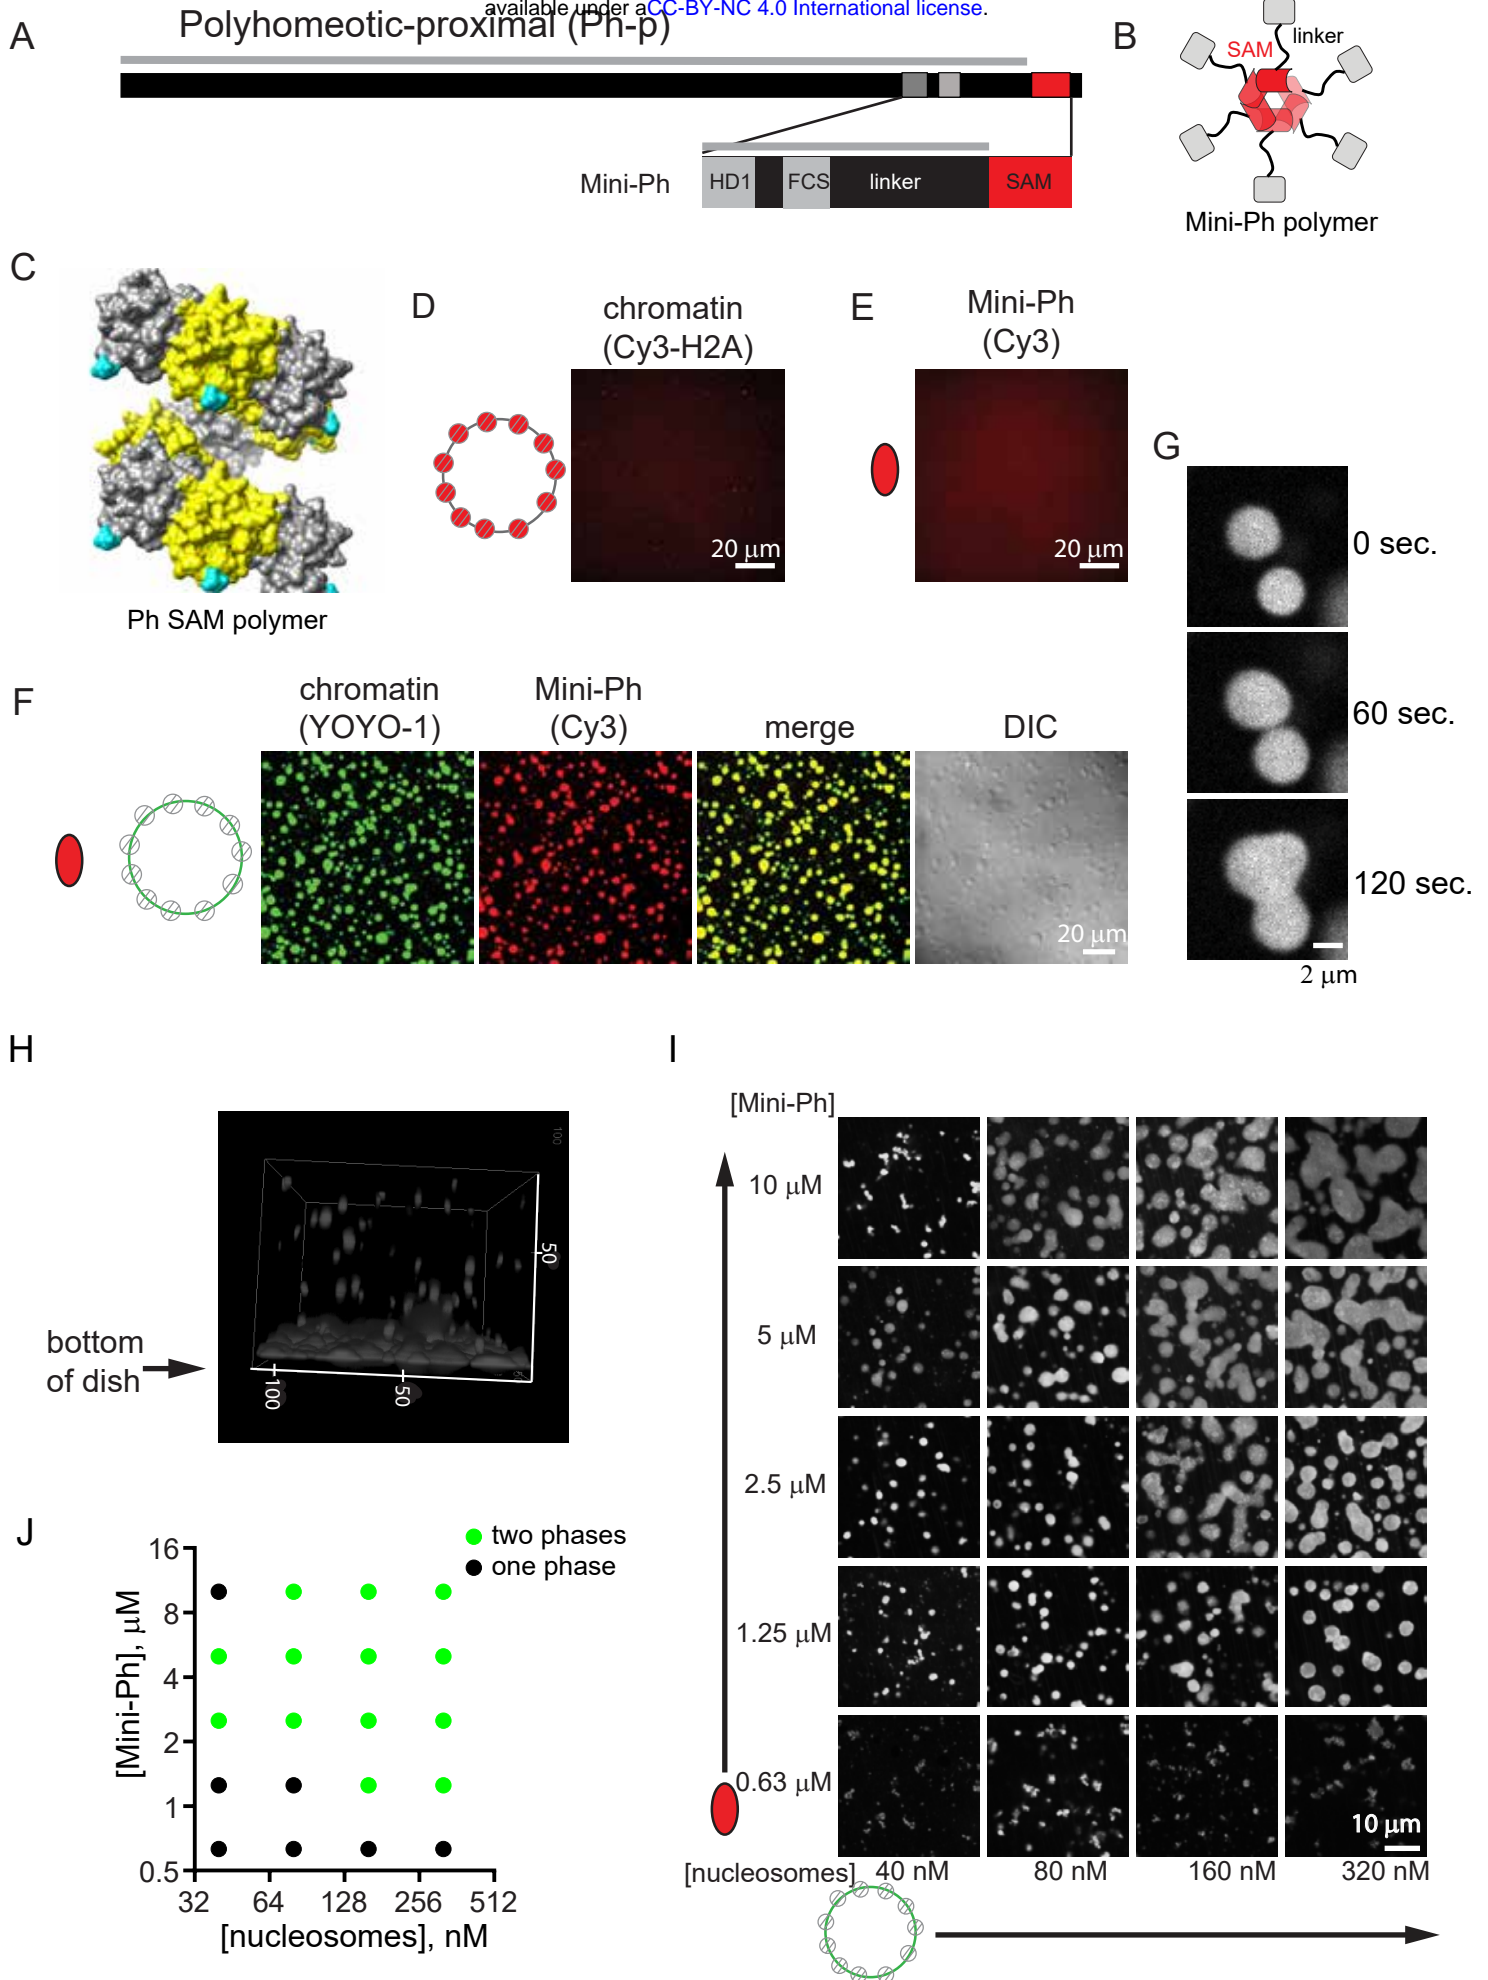

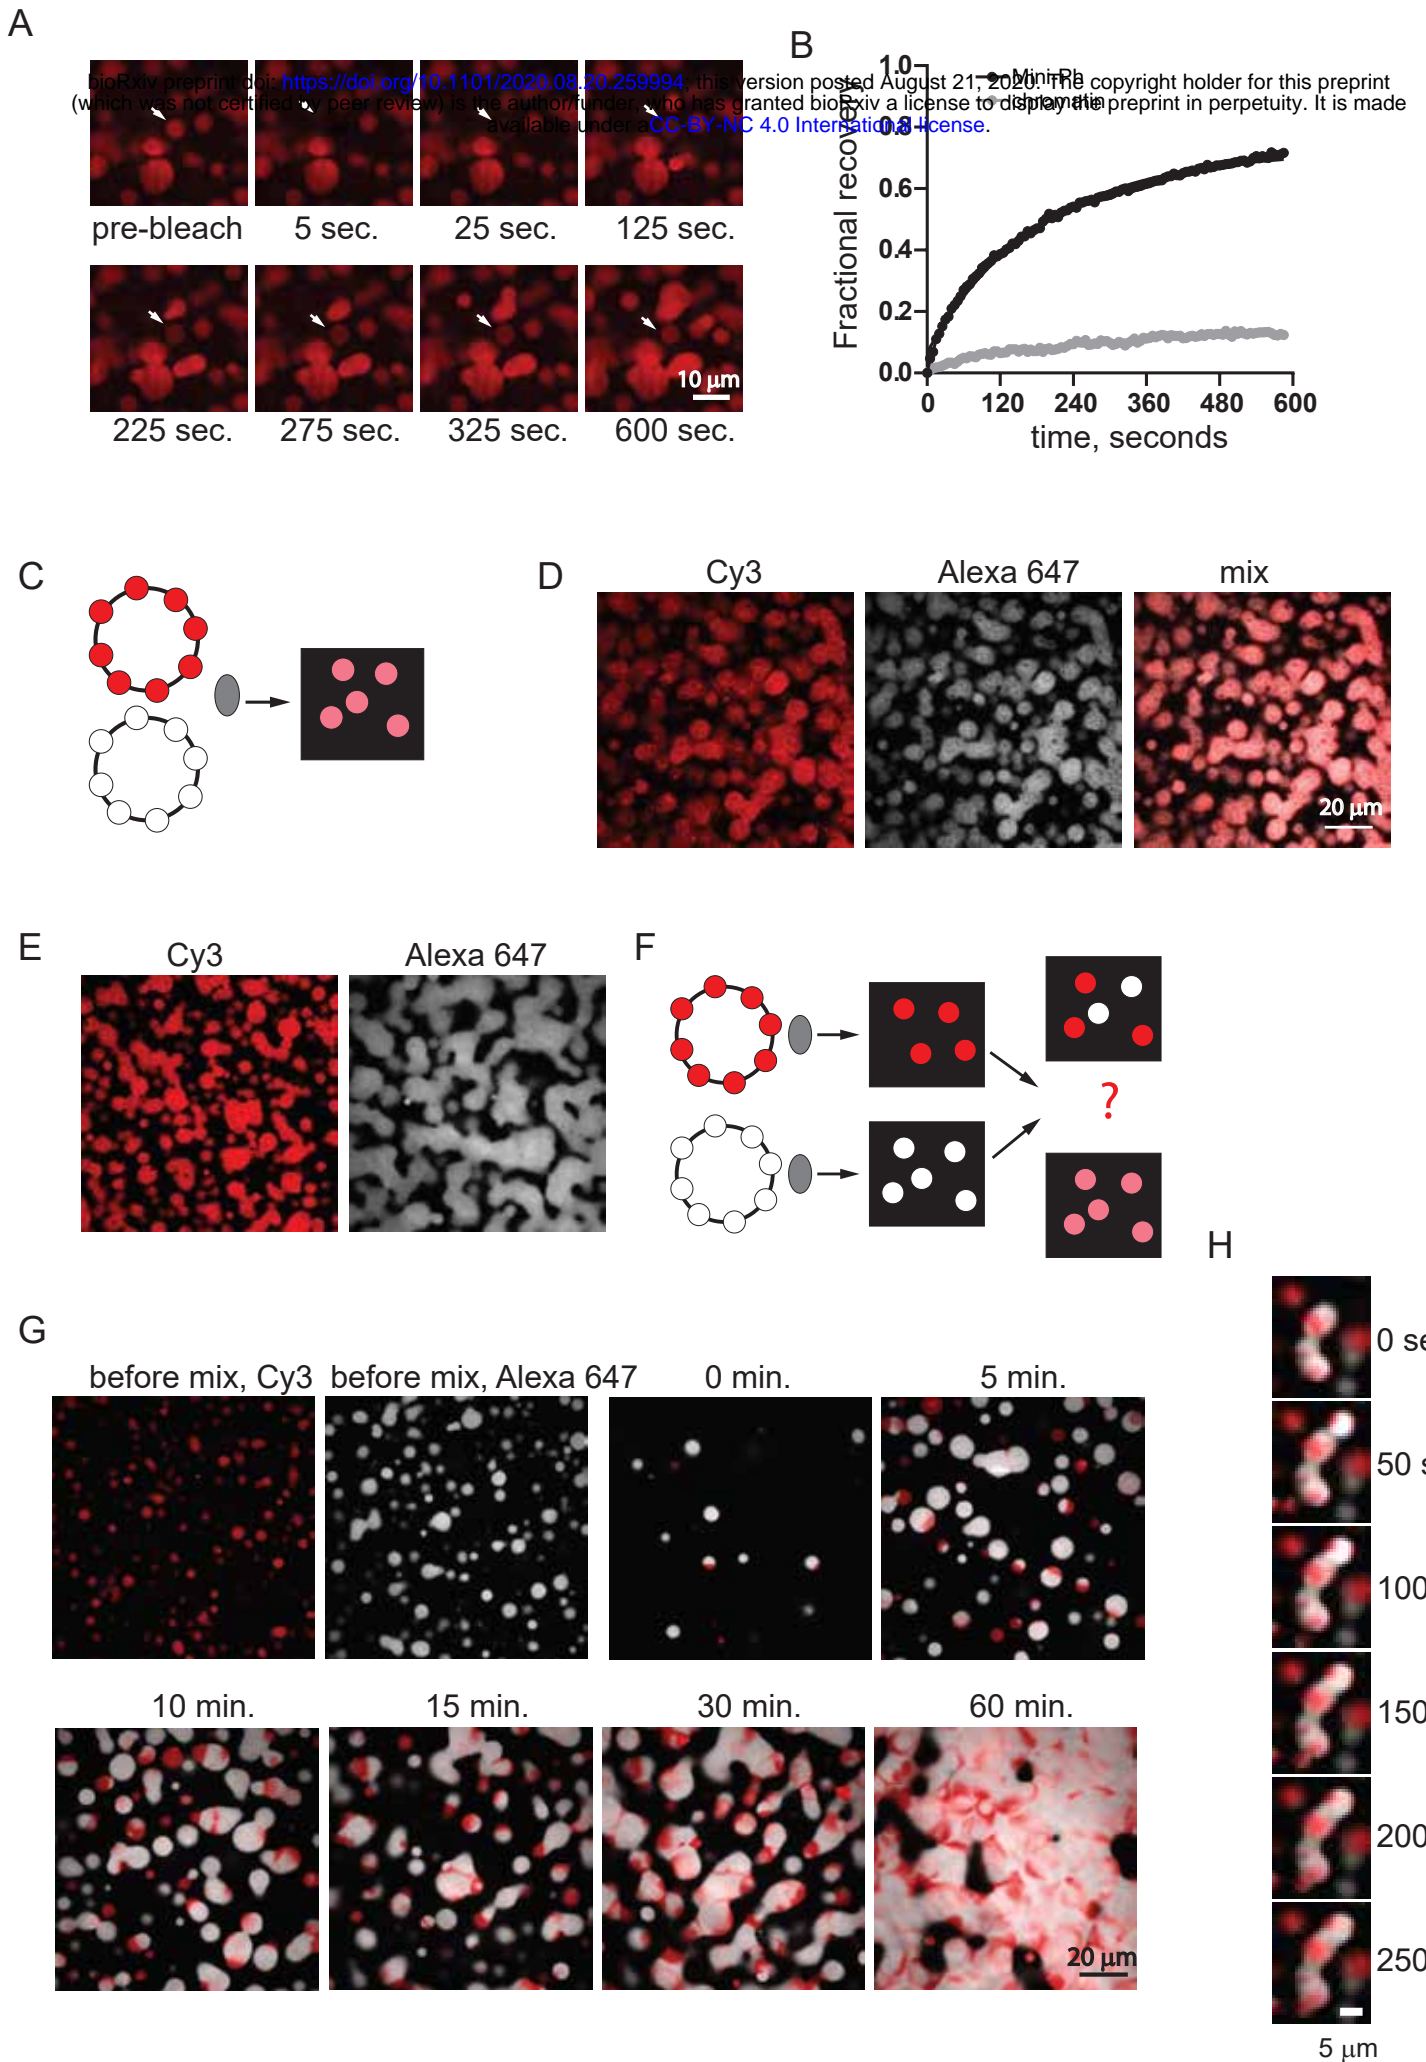

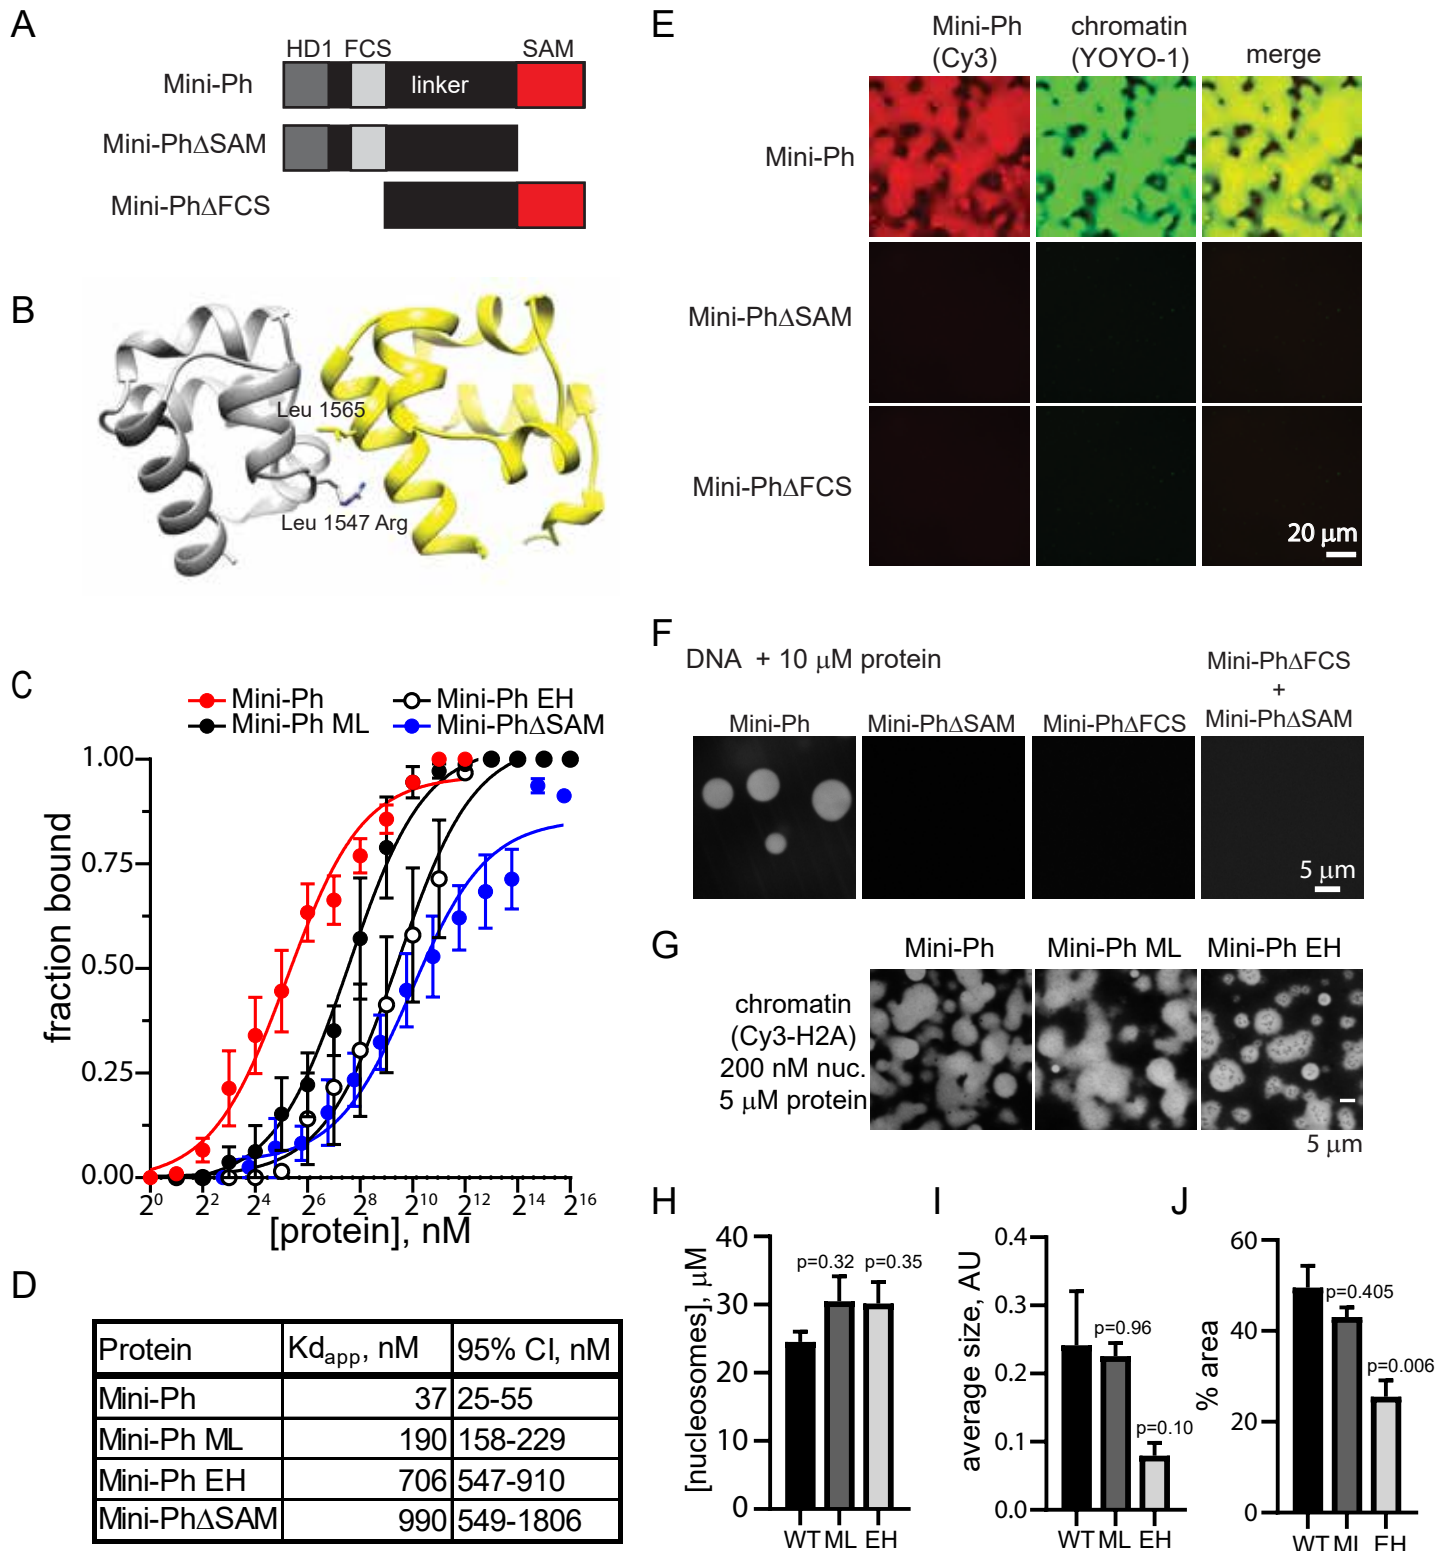



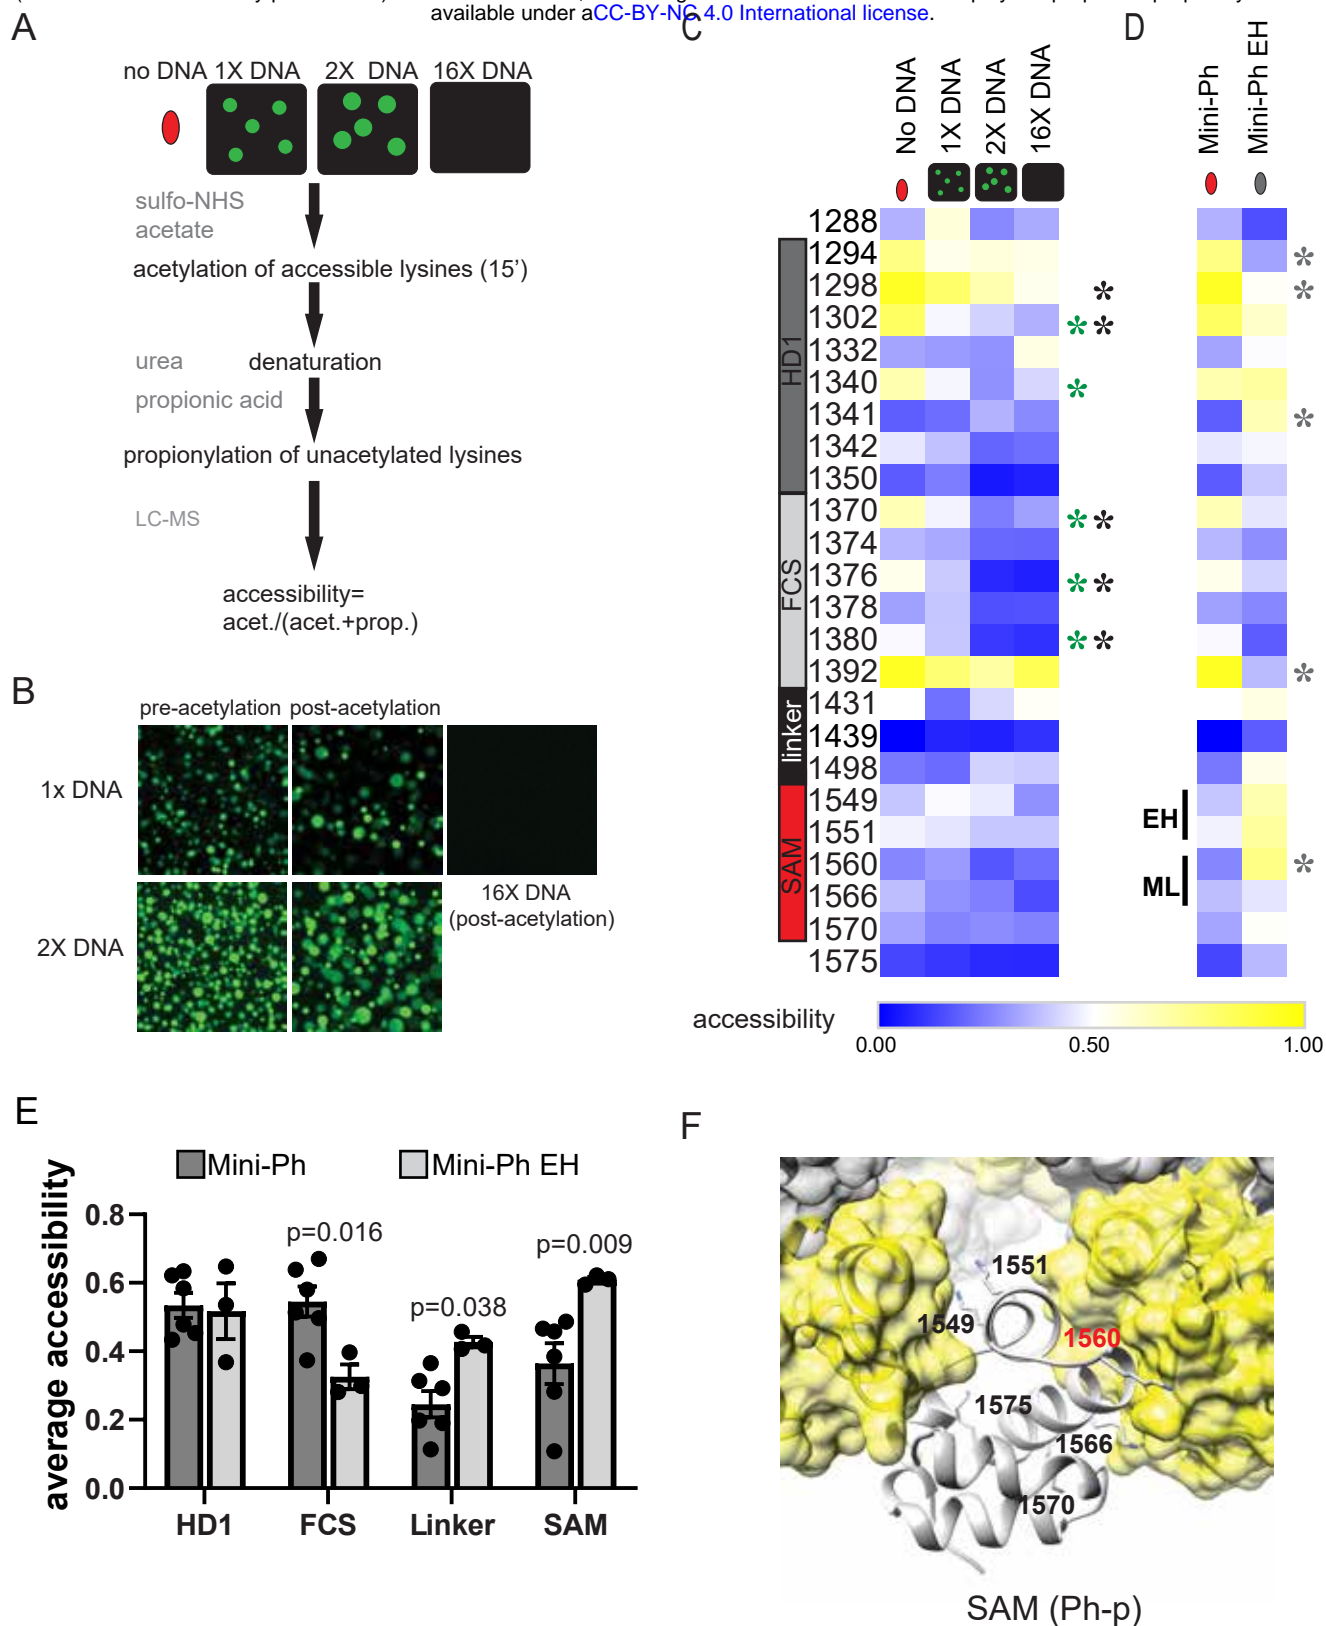

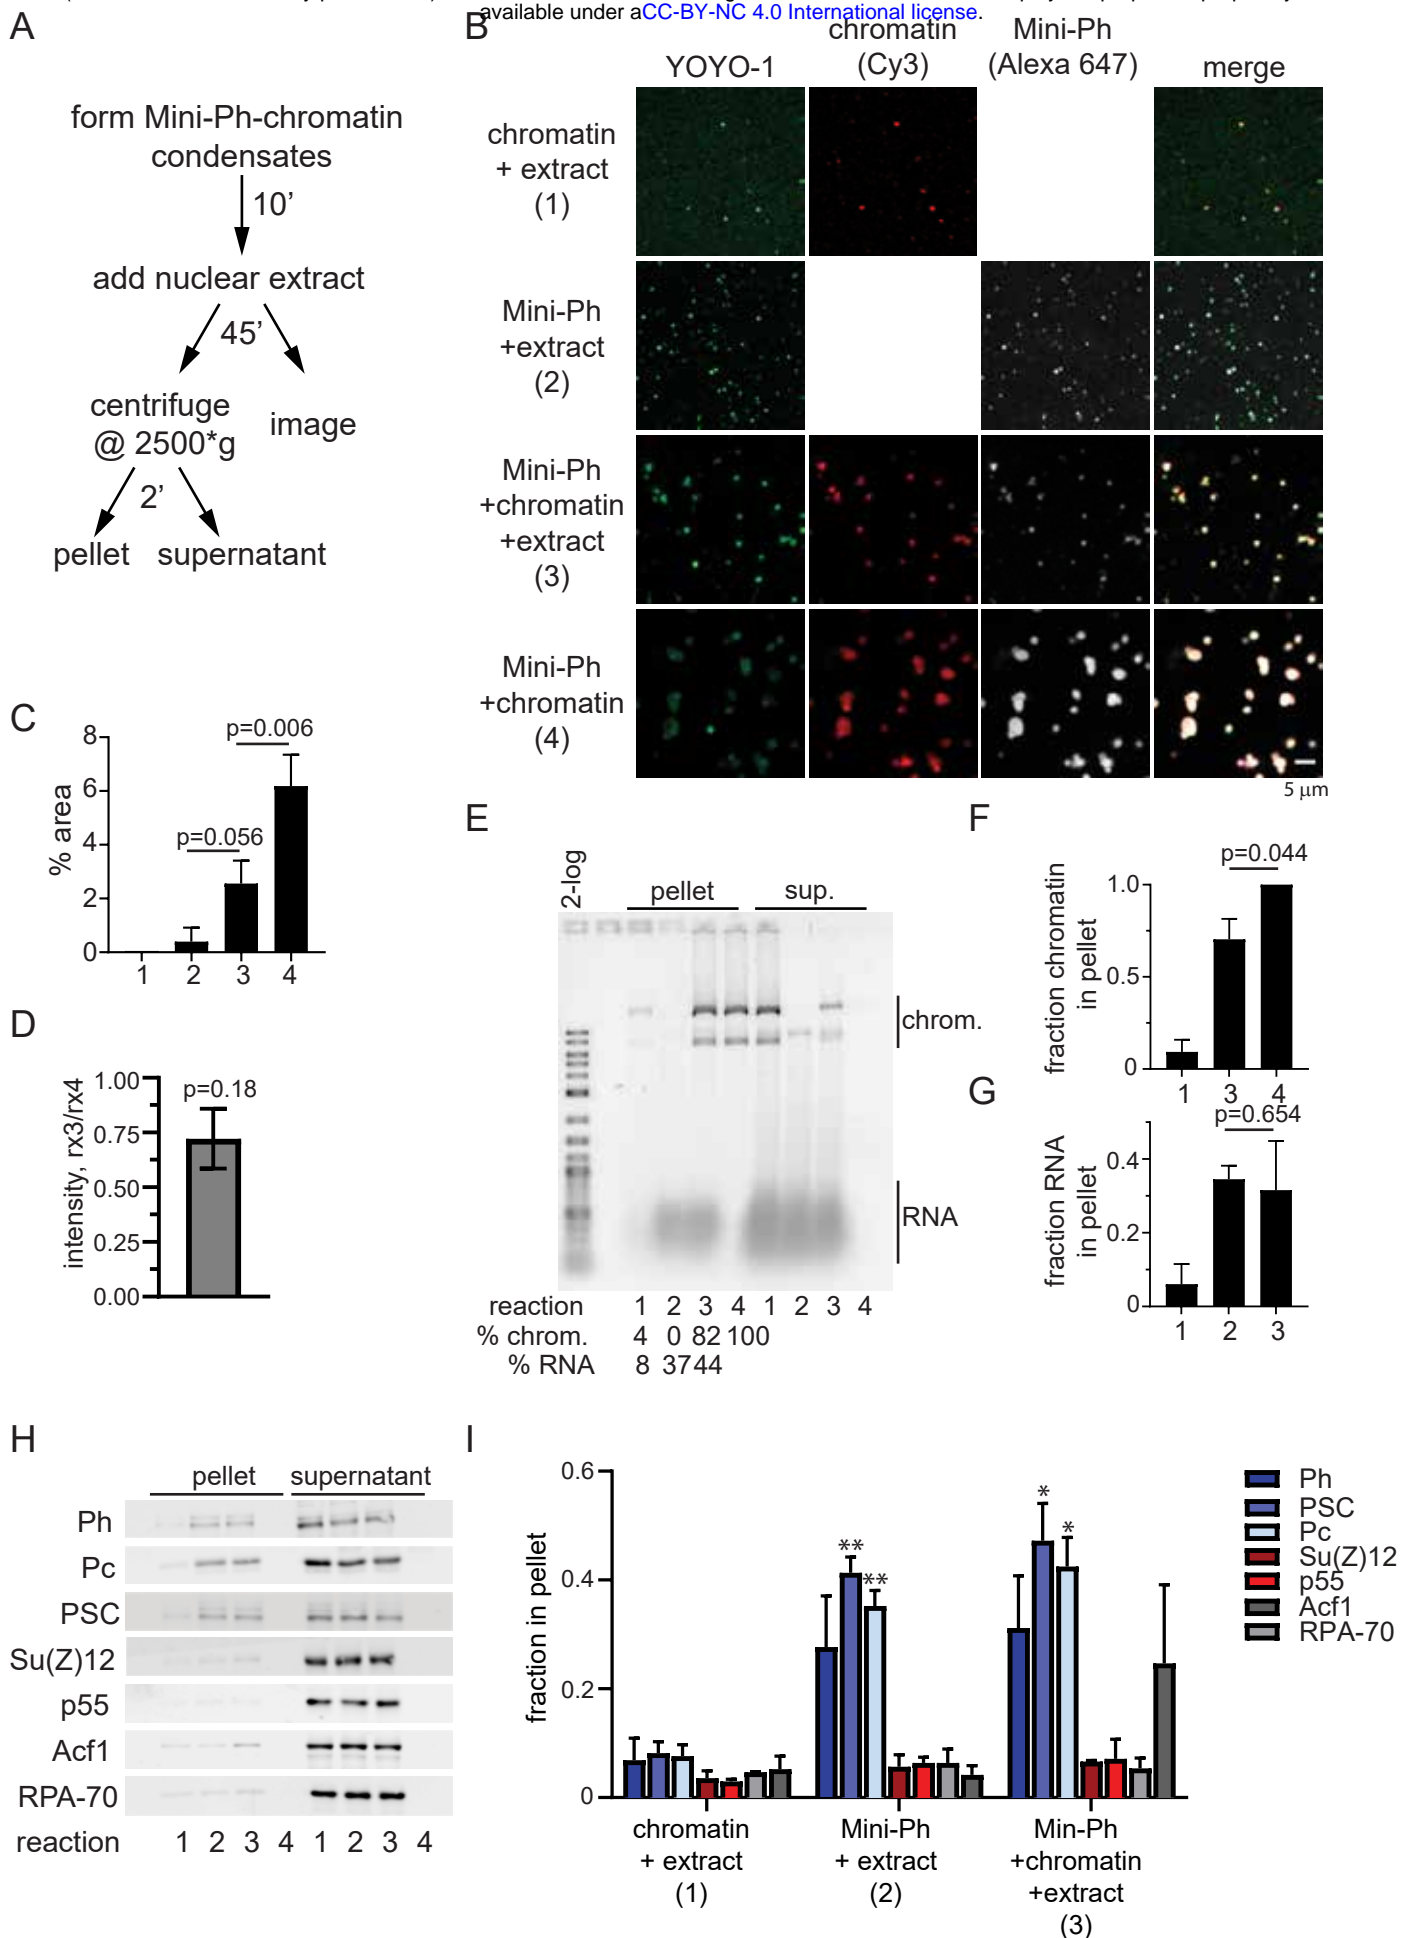



A

form Mini-Ph-chromatin condensates → add nuclear extract + 10 min → E1 → E2 → Ub → 80 min → SPS → PAGE

bioRxiv preprint doi: <https://doi.org/10.1101/2020.08.20.259994>; this version posted August 21, 2020. The copyright holder for this preprint (which was not certified by peer review) is the author/funder, who has granted bioRxiv a license to display the preprint in perpetuity. It is made available under aCC-BY-NC 4.0 International license.

B

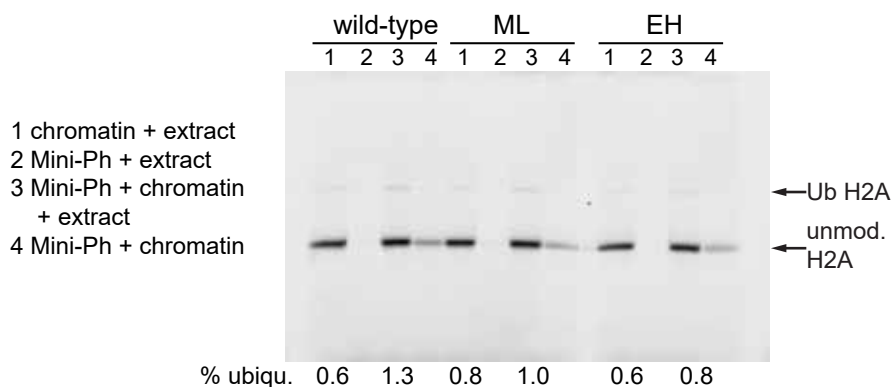

C

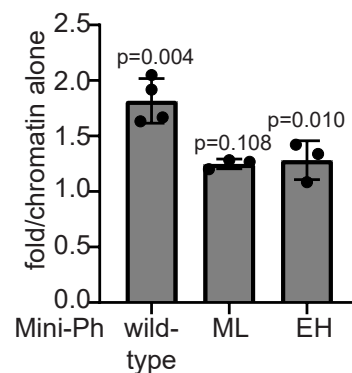

D

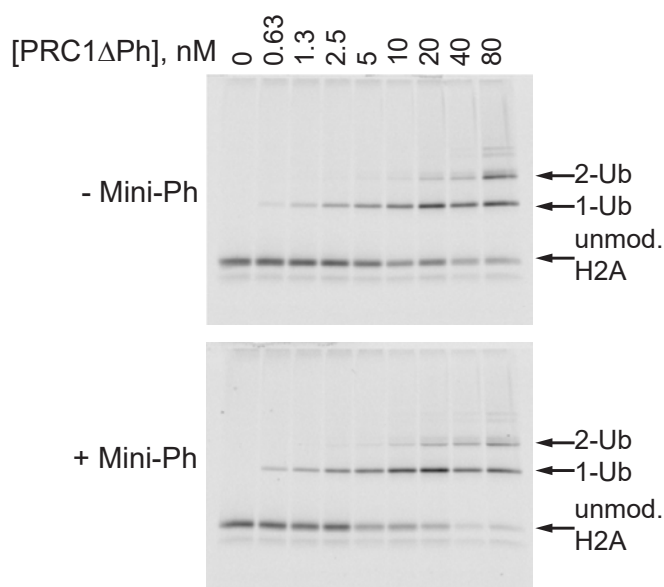

F

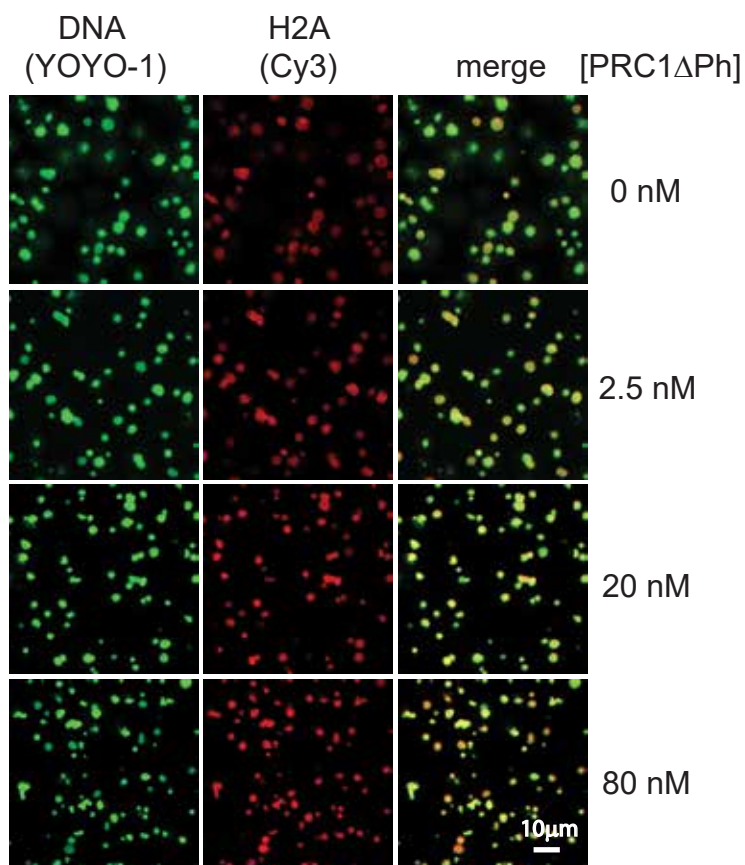

E

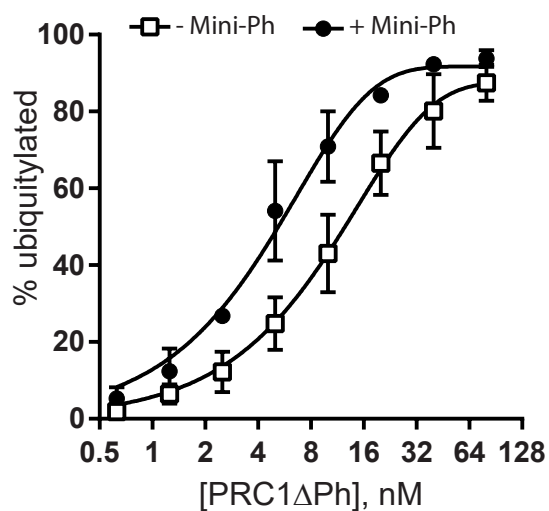

G

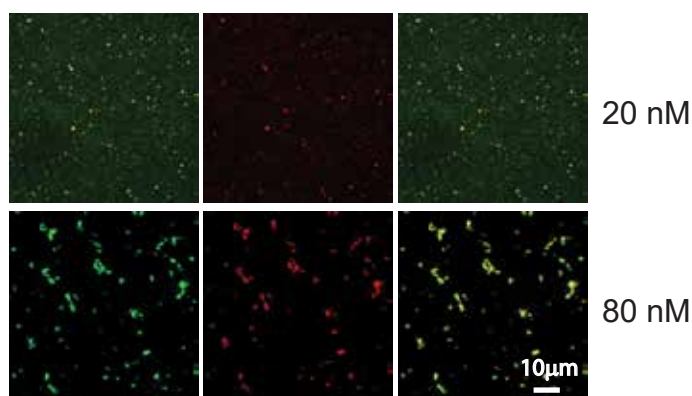

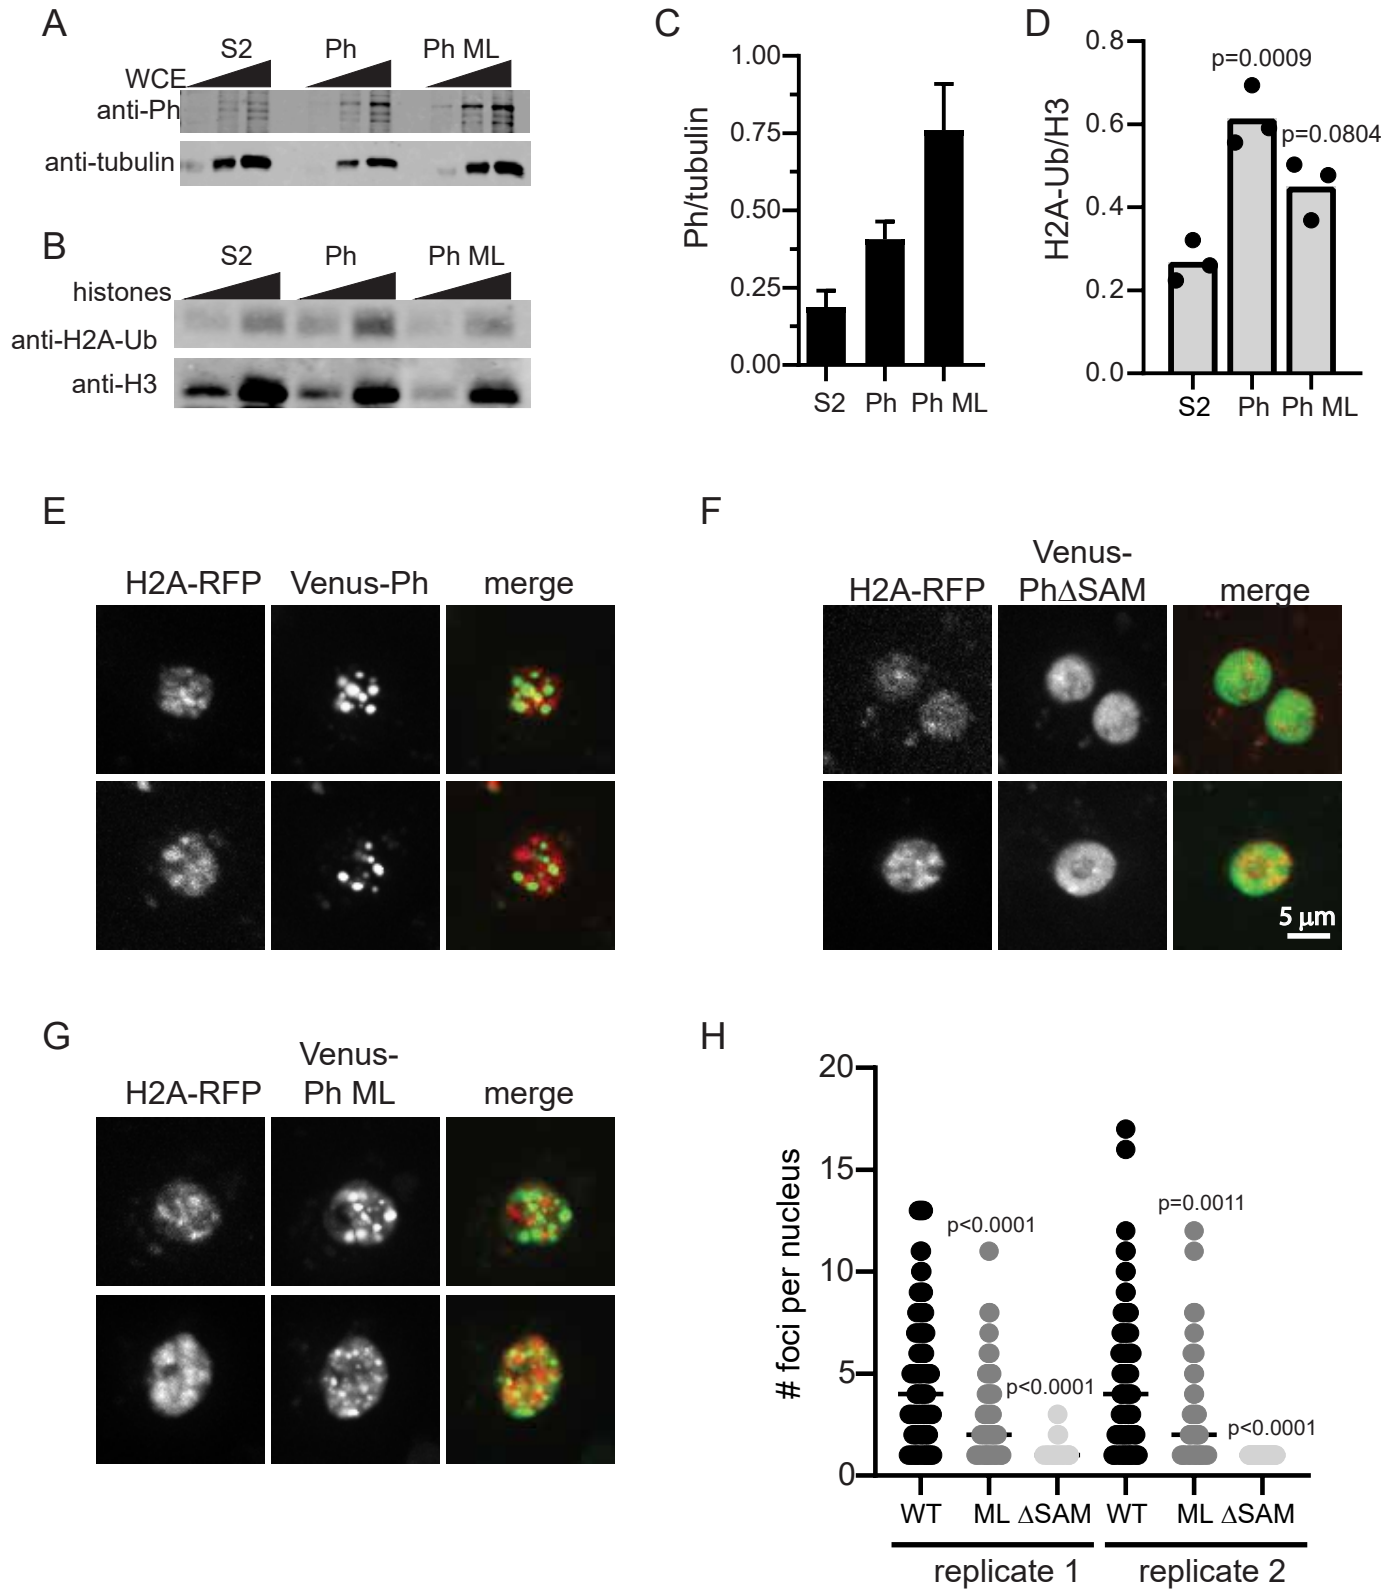

## **Phase separation by the Sterile Alpha Motif of Polyhomeotic compartmentalizes Polycomb Group proteins and enhances their activity**

### **Supplemental information:**

**Supplementary Figures 1-18**

**Supplemental Movie Legends 1-3**

**Supplementary Table 1**

A

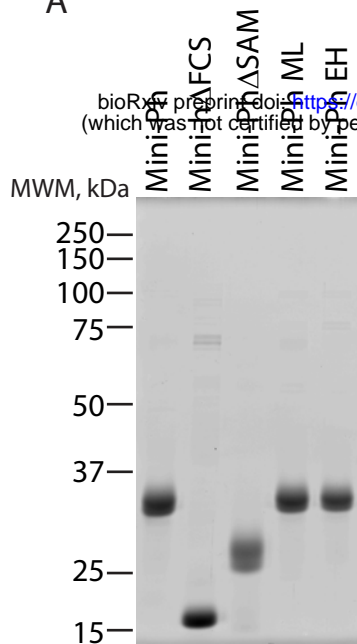

B

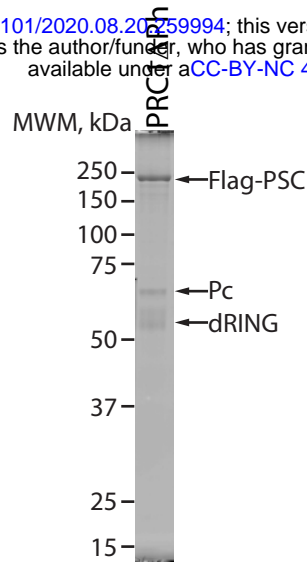

C

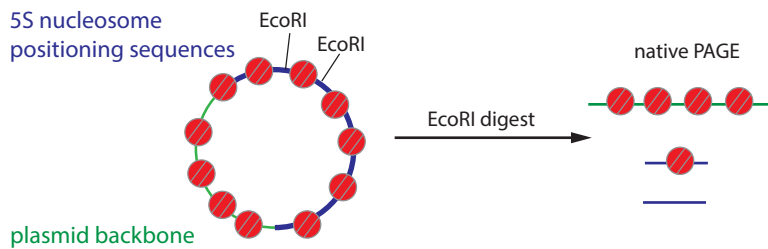

D

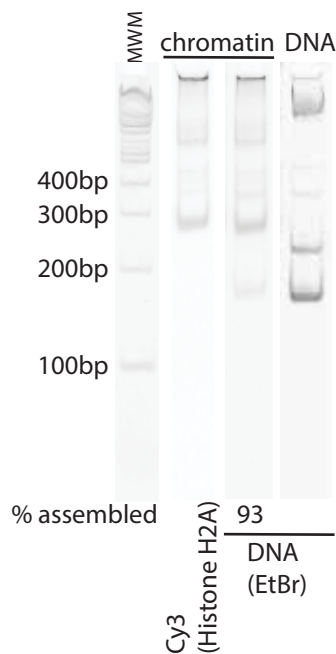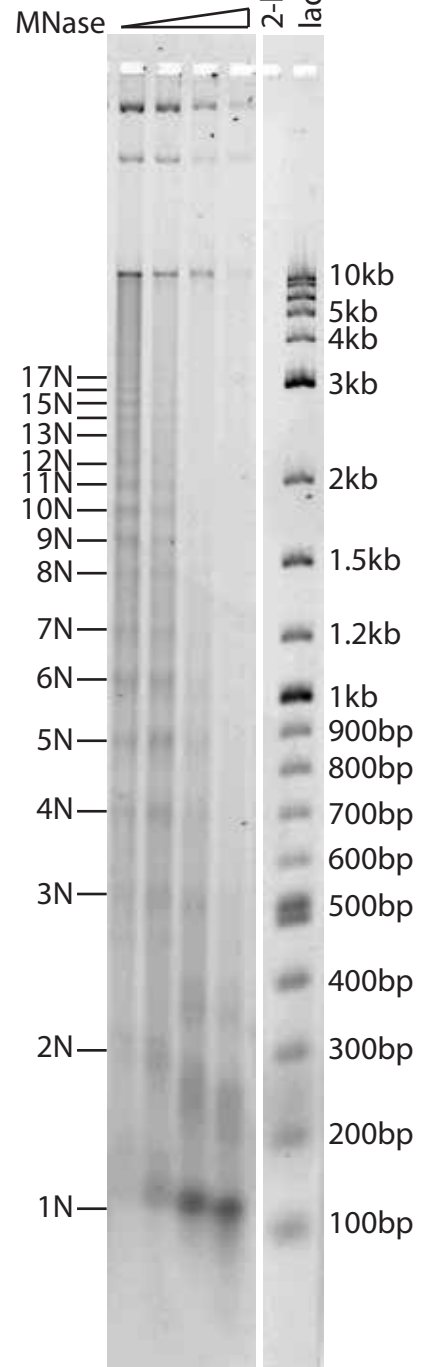

bioRxiv preprint doi: <https://doi.org/10.1101/2020.08.20.275994>; this version posted August 21, 2020. The copyright holder for this preprint (which was not certified by peer review) is the author/funder, who has granted bioRxiv a license to display the preprint in perpetuity. It is made available under aCC-BY-NC 4.0 International license.

**Supplementary Figure 1 Proteins and Chromatin used in these experiments.** A. SYPRO Ruby stained SDS-PAGE of Mini-Ph and its derivatives that were prepared in *E. coli*. Equimolar amounts of each protein were loaded. B. Ruby stained gel of 3-subunit PRC1 consisting of Flag-PSC, Pc, and dRING (PRC1 $\Delta$ Ph). C. Schematic of plasmid used for chromatin assembly. The plasmid used for most experiments consists of 40\*5S nucleosome positioning sequences (208 base pair repeat) (blue), and the plasmid backbone (green). Each 5S sequence is flanked by EcoRI sites. To estimate nucleosome assembly, chromatinized plasmids are digested with EcoRI, and the naked and nucleosomal 5S repeats resolved by native PAGE. D. Representative gel of EcoRI digest. Left shows DNA stain used to quantify naked and nucleosomal repeats, and right side shows the Cy3 label on histone H2A. E. Micrococcal nuclease analysis of chromatin used for condensate formation. Numbers on the right indicate fragments representing nucleosomal increments.



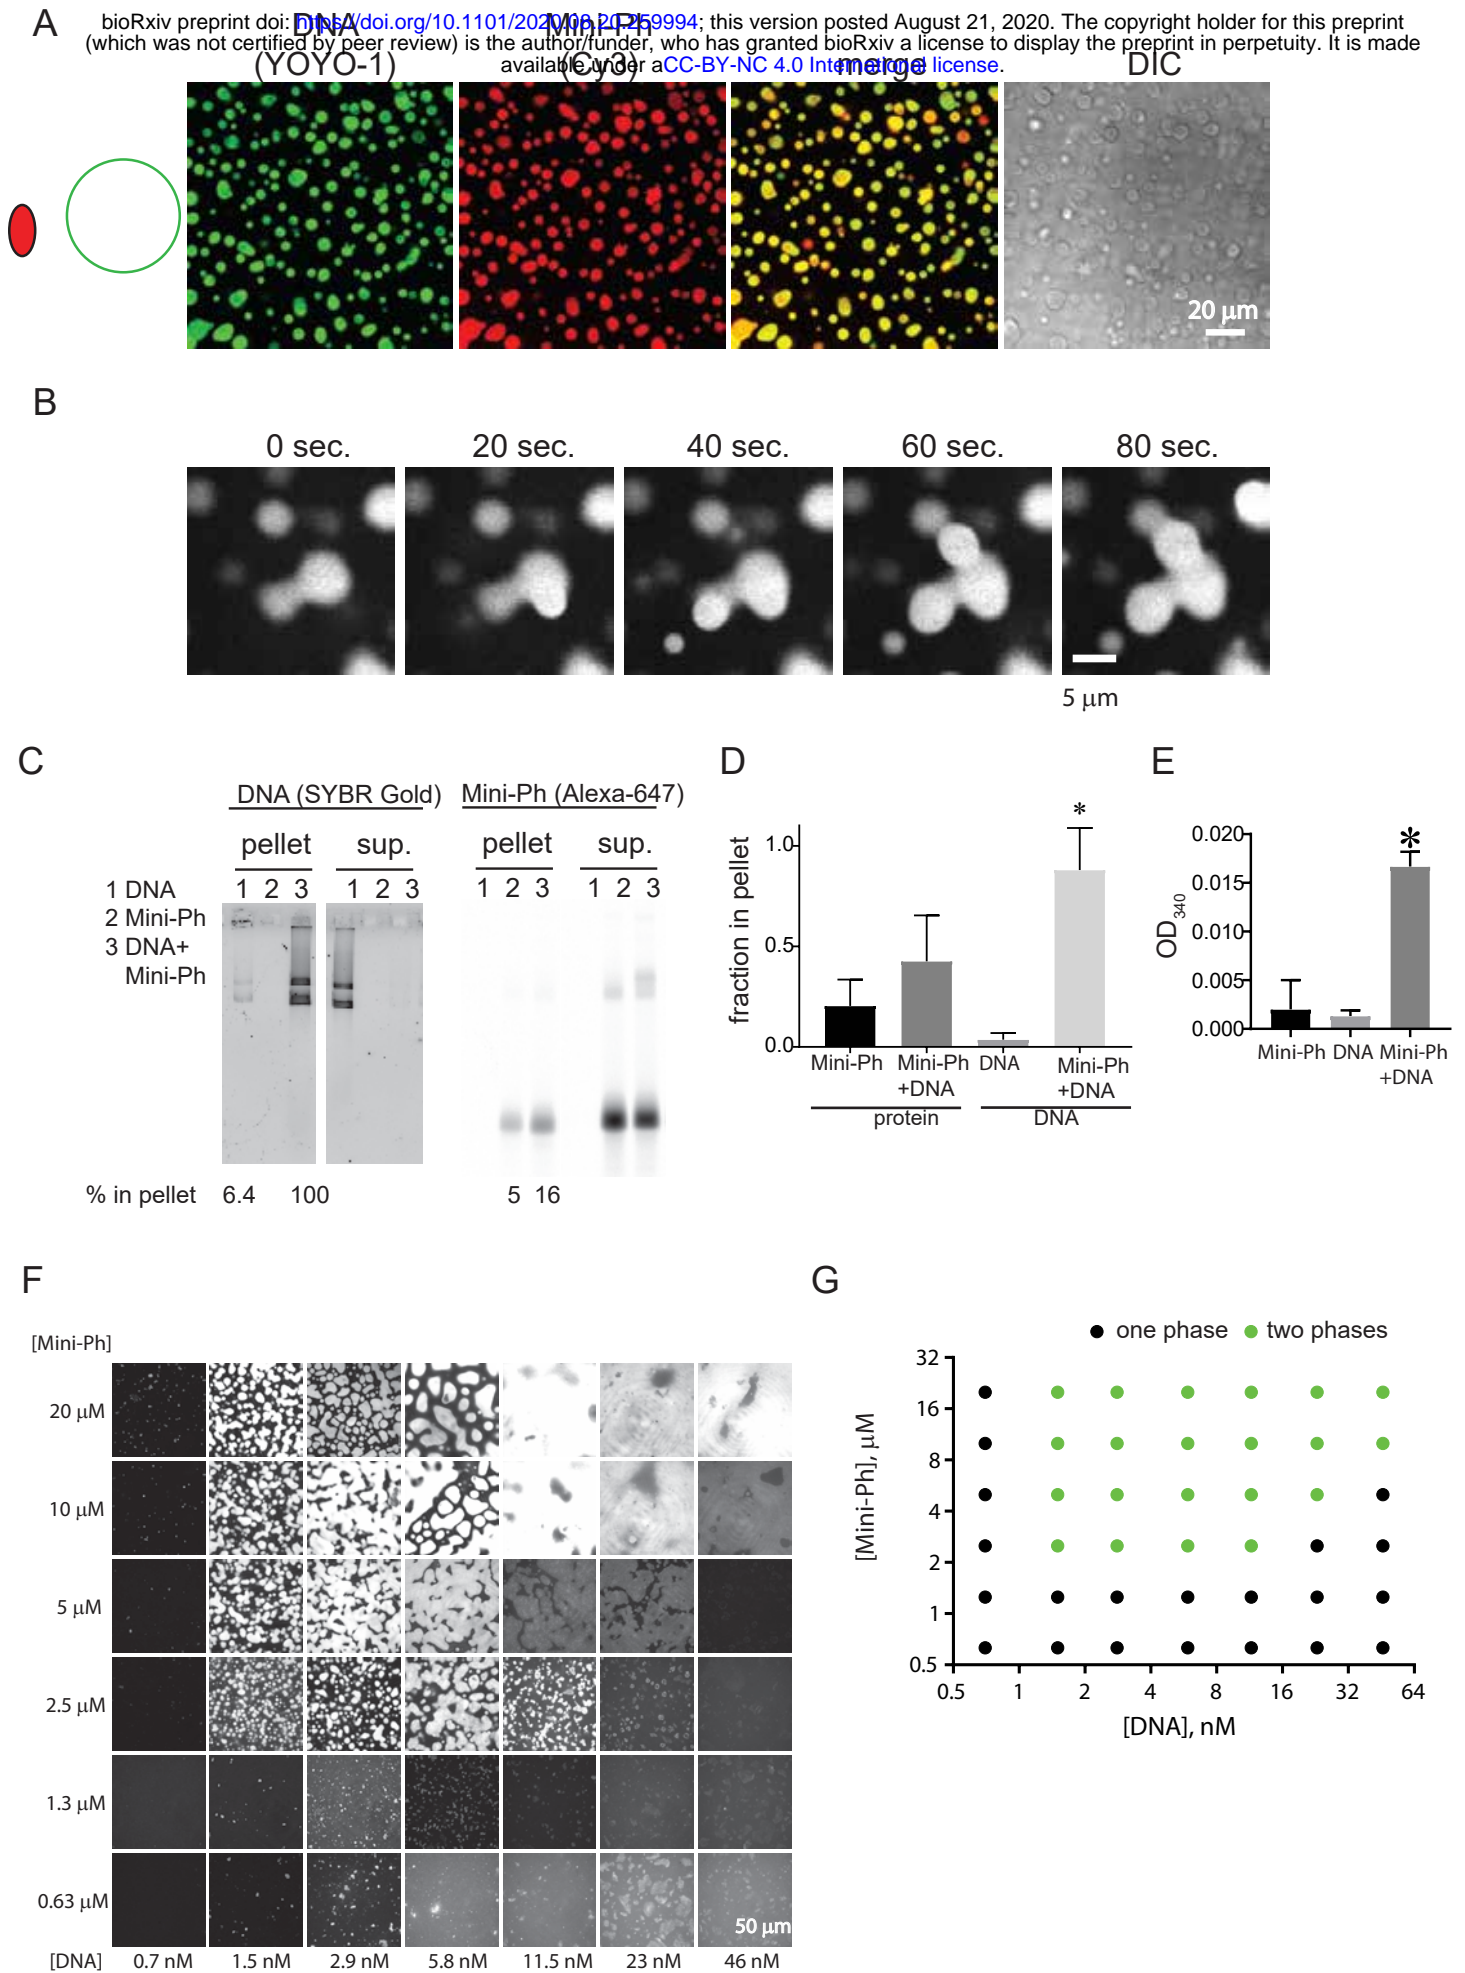

**Supplementary Figure 2 Mini-Ph forms phase separated condensates with DNA.** A. Mini-Ph forms phase separated condensates with DNA. B. Time-lapse of droplet fusion of Mini-Ph-chromatin condensates, visualized with Alexa 647-labelled Mini-Ph. C-E. Mini-Ph-DNA condensates can be pelleted by brief centrifugation. Representative gels (C) of DNA (left) and protein (fluorescent scan of Alexa 647-labelled Mini-Ph). Condensates were allowed to form for 15 min. at room temperature. D. Quantification of pelleting experiments. E. Mini-Ph-DNA condensates increase turbidity measured by OD<sub>340</sub>. \* indicates p<0.05, student's t-test. F. Matrix of Mini-Ph and DNA. G. Graph of one-phase versus two-phase regions of the Mini-Ph-DNA matrix. Note that high concentrations of DNA disrupt condensate formation (e.g. 46 nM DNA with 5  $\mu$ M Mini-Ph). [DNA] refers to the concentration of plasmids.

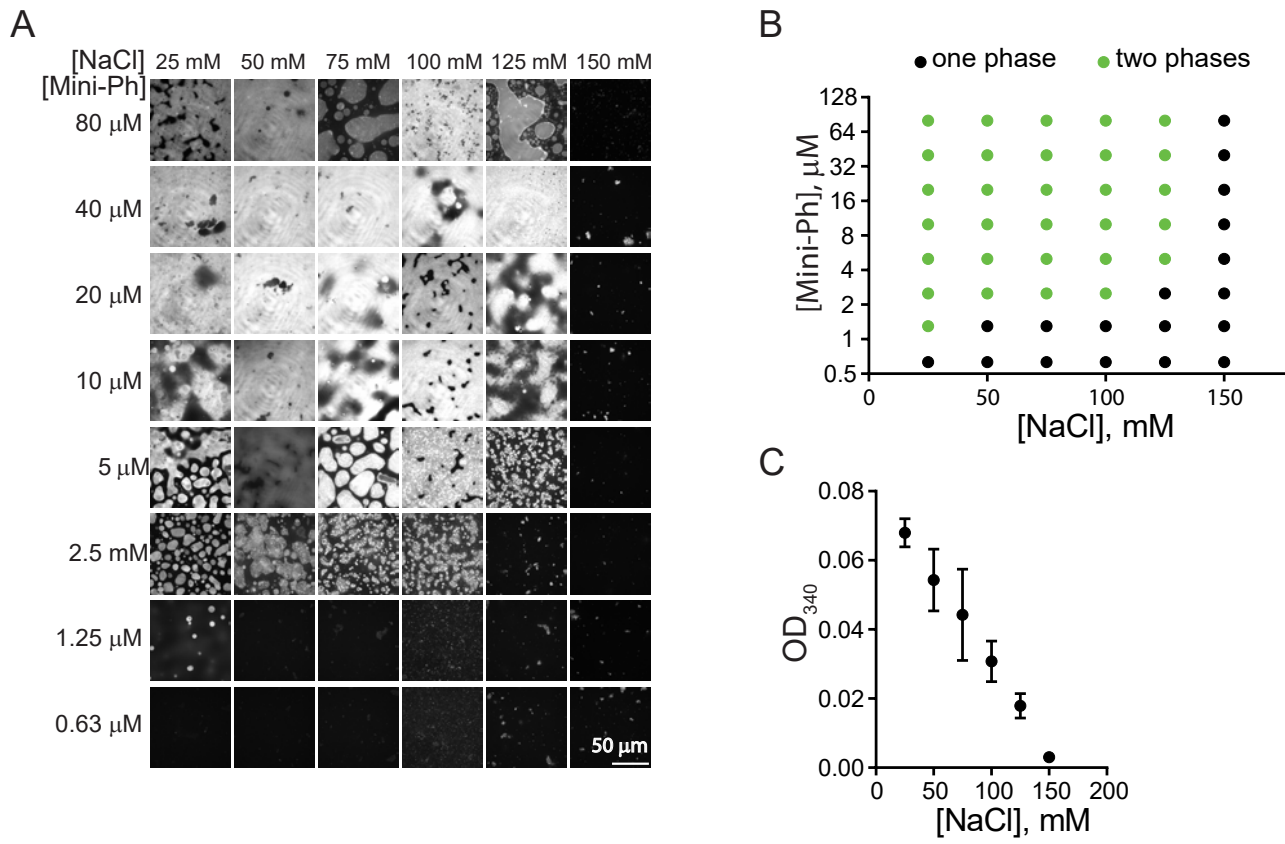

**Supplementary Figure 3 Mini-Ph-DNA condensates are sensitive to NaCl concentration.** A, B. Matrix of Mini-Ph-DNA condensates and across different concentrations of NaCl. A shows representative images, and B the graph of one-phase versus two-phase points. C. Increasing [NaCl] disrupts condensates as measured by OD<sub>340</sub>. Mean +/- SD of three titrations.

A

### Mini-Ph linker

GVGSGE**T**NGL GTGGIVGVDA MALVDRLDEA MAEE**K**MQTEA TPKLSE**S**FPI  
 LGASTE**V**PPM SLPVQAAISA PSPLAMPLGS PLSVALPTLA PLSVVTSGAA  
 PK**S**SE**V**NGTD R

positively charged  
 negatively charged  
 aromatic  
 polar  
 aliphatic  
 proline

B

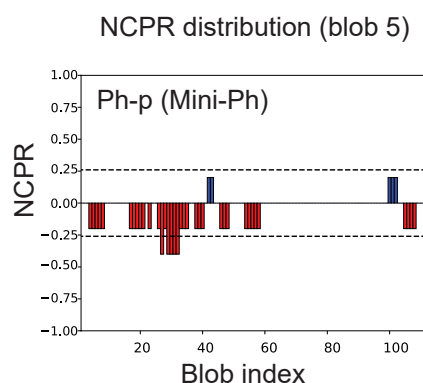

C

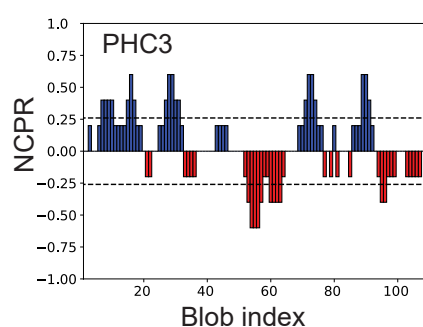

D

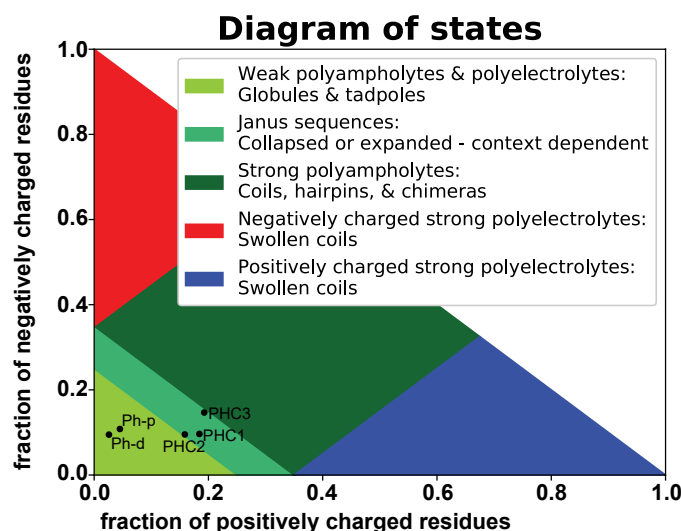

E

| protein | FCR, pH 8 | NCPR, pH 8 | PI   | fr. Neg | fr. Pos | fr. expanding, pH 8 | fr. disord. pro. | kappa |
|---------|-----------|------------|------|---------|---------|---------------------|------------------|-------|
| Ph-p    | 0.153     | -0.063     | 3.9  | 0.108   | 0.045   | 0.261               | 0.703            | 0.115 |
| Ph-d    | 0.121     | -0.069     | 3.6  | 0.095   | 0.026   | 0.233               | 0.647            | 0.128 |
| PHC1    | 0.281     | 0.088      | 10.9 | 0.096   | 0.184   | 0.368               | 0.746            | 0.291 |
| PHC2    | 0.254     | 0.063      | 10.1 | 0.095   | 0.159   | 0.325               | 0.762            | 0.233 |
| PHC3    | 0.339     | 0.046      | 10.5 | 0.147   | 0.193   | 0.422               | 0.734            | 0.220 |

F

Ph-p GVGSGE**T**NGLGTGGI VGV**D**AMALVDRLDEA MAEE**K**MQTEAATPKL**S**ESFPI LGASTE**V**PPM  
 Ph-d GVGSGE**T**NGLGTGGI VGV**D**AMALVDRLDEA MAEE**K**MQTE**S**YQTV**S**DALPIQAATPE**V**PP**I**

Ph-p SLPVQAAI**S**AP**S**PLAMPLGSPL**S**VALPTLAPL**S**VVTS**G**A-----AP**K**SS**E**VNGT**D**R  
 Ph-d SMPVLAAM**S**T**S**PL**S**PL**L**TL**L**PL**P**AIAPT**V**SL**P**V**V**SAG**V**AP**V**LAI**P**SS**N**I**N**GS**D**R

G

PHC1 RYN**V**SC**S**HQ**F**RL**K**R**K**MM**K**E**F**Q**E**ANY**A**R-**V**RR**R**G**P**RR**S**S**D**I-----**A**RA**K**I**Q**G**K**  
 PHC2 RYN**V**G**C**T**K**R**V**GL**F**HS**D**RS**K**L**Q**K**A**GA**A**TH**N**RR**R**AS**K**AS**L**PL**P**LT**K**DT**K**K**Q**PT**G**T**V**PL**S**VT**A**A  
 PHC3 RYN**V**SC**S**K**K**F**A**LS**R**WN**R**K**P**DN**Q**SL-----**G**HR**G**RR**P**S**G**P**D**-----**G**A**A**RE**H**L**R**Q

PHC1 --**C**HR**G**Q**E**DS**S**RS**G**SD**N**SS**S**Y**D**E**A**LS**P**TS**P**GPL**S**VR**A**GH**G**ER**D**L**G**NP**T**AP**P**TE**L**H**G**I**N**P**V**  
 PHC2 **L**QL**T**HS**Q**E**D**SS**R**CS**D**NS**S**Y**E**E**P**LS**P**IS**A**SS**S**TS**R**RR**Q**Q**R**D**L**EL**P**DM**H**-**M**R**D**L**V**GM**G**H**H**  
 PHC3 **L**PI**T**Y**P**SA**E**ED**L**AS**H**ED**S**VP**S**AM**T**TR**L**RR**Q**S**E**RE**R**ER**E**L**R**D**V**RI**R**K**M**PE**-**NS**D**L**L**P**V**A**Q**-

PHC1 **F**LS**S**SN**P**S**-**R  
 PHC2 **F**LP**S**E**P**T**-**K  
 PHC3 **-****-****-****T**E**P**S**I**W



**Supplementary Figure 4 Sequence properties of Mini Ph linker.** A. Colour coded Mini-Ph linker sequence. Gray and red lines indicate linker residues that may interact with Ph SAM based on NMR results with the linker and the SAM in trans. Red line indicates residues that had altered NMR signals when mixed with 0.4 molar equivalents of Ph SAM, and gray lines those with altered signals with 1.6 molar equivalents of Ph SAM. See Robinson et al. (2012, JBC) for details. B. Plot of net charge per residue (NCPR, pH 8.0) of Mini-Ph linker indicating charge distribution in the linker. C. Plot of NCPR (pH 8.0) for PHC3, indicating distinct charge patterning compared with Ph-p. D. Das-Pappu diagram of states for both *Drosophila* and all three human Ph linkers, showing that the *Drosophila* and human linkers have distinct properties. E. Summary of properties of Ph linkers calculated with <http://pappulab.github.io/localCIDER/>. See also Supplementary Table 1 for all sequences and parameters (FCR=fraction charged residues). F. Alignment of Ph-p and Ph-d linkers. G. Alignment of PHC1-3 (human Ph homologues) linkers.

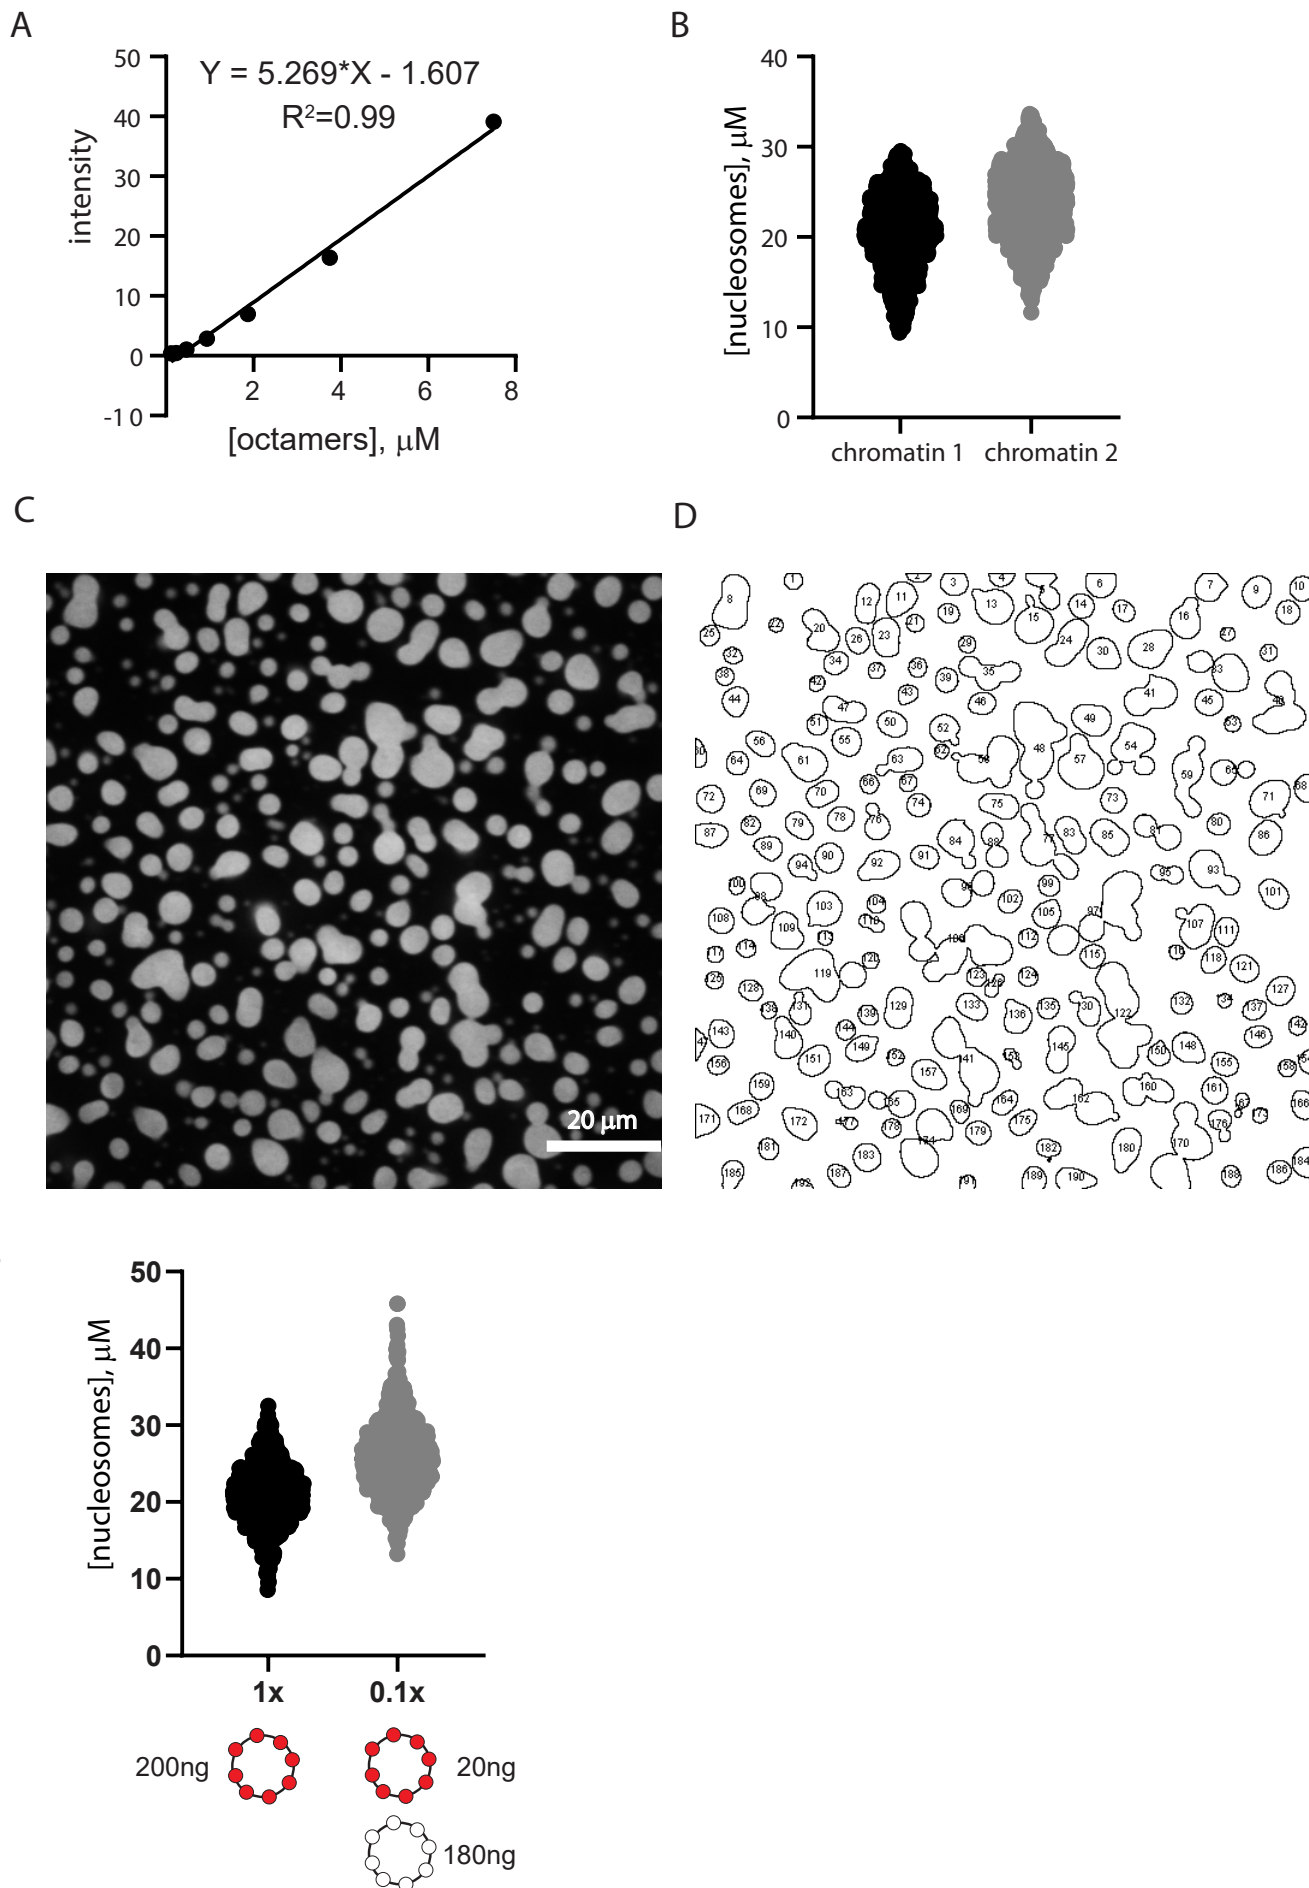

**Supplementary Figure 5 Quantification of nucleosome concentration in condensates.** A. Standard curve prepared from serial dilution of Cy3-labelled (on H2A) histone octamers. Buffer alone was used to collect a background intensity, which was subtracted, from all images. B. [nucleosomes] in individual structures measured from two reactions carried out with different chromatin assemblies. Chromatin 2 was assembled at higher nucleosome density, presumably explaining the higher nucleosome concentration in condensates. C. Example image used for quantification of nucleosome concentration. D. Outlines of thresholded structures selected for quantification for the image shown in C. E. Graph of experiments comparing concentrations of structures measured with a 1:9 mixture of Cy3-labelled (0.1X) to unlabelled (1X) chromatin versus all Cy3-labelled. The calculated concentrations are similar ( $21 \pm 4 \mu\text{M}$  and  $26 \pm 5 \mu\text{M}$ ) in both reactions, suggesting the measurements in the dense phase with all labelled chromatin are in the linear range.

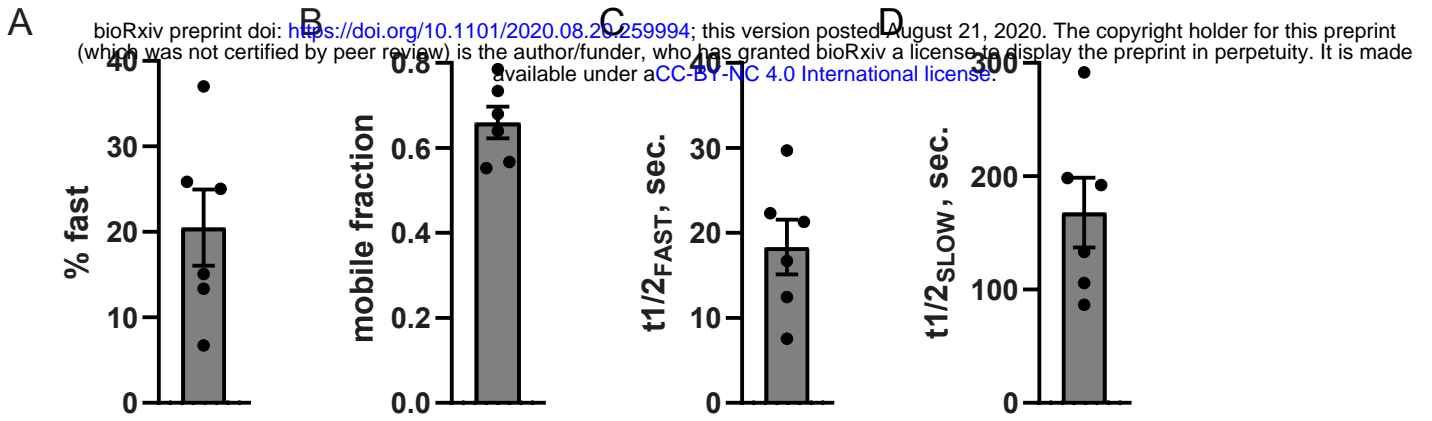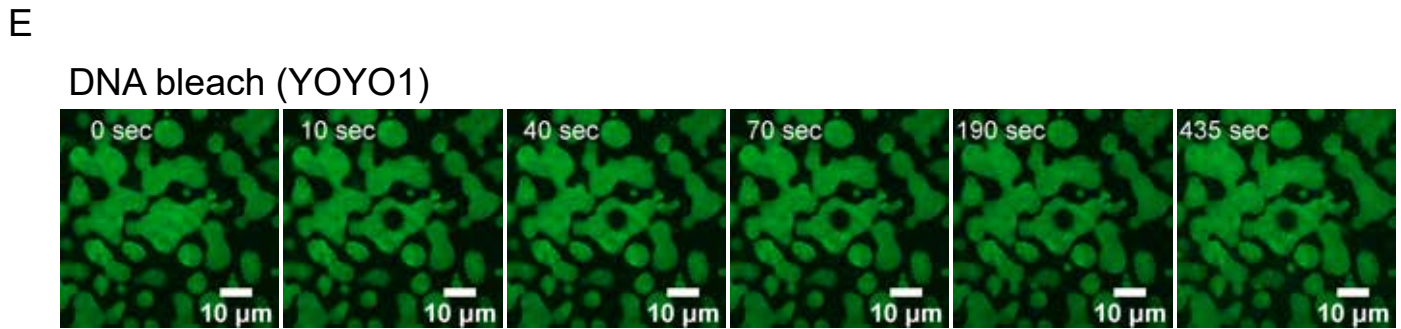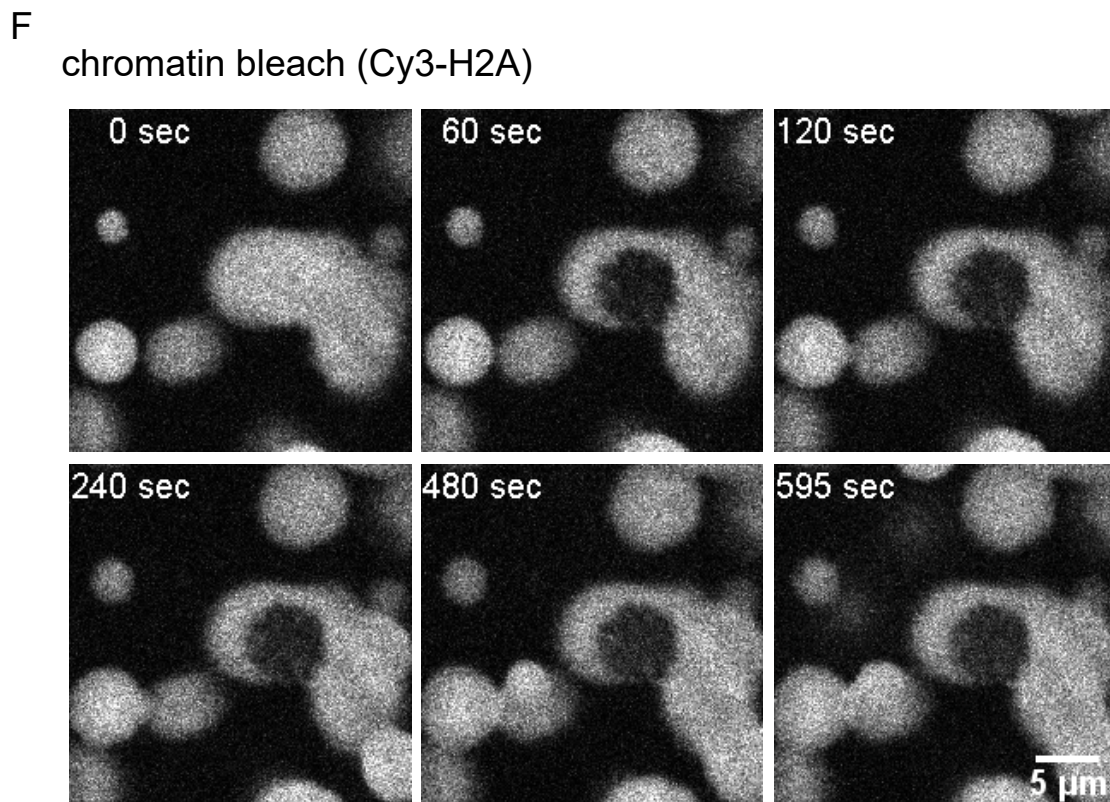

**Supplementary Figure 6 Kinetics of chromatin and Mini-Ph in condensates are distinct.** A-D. Summary of parameters from double exponential fits of FRAP data. All bars show mean +/- SEM. E. Time lapse of recovery of chromatin in a condensate. The DNA component of chromatin was visualized (with YOYO1) and bleached. F. Time laps of recovery of chromatin in a condensate after photobleaching. H2A-Cy3 was visualized.



A

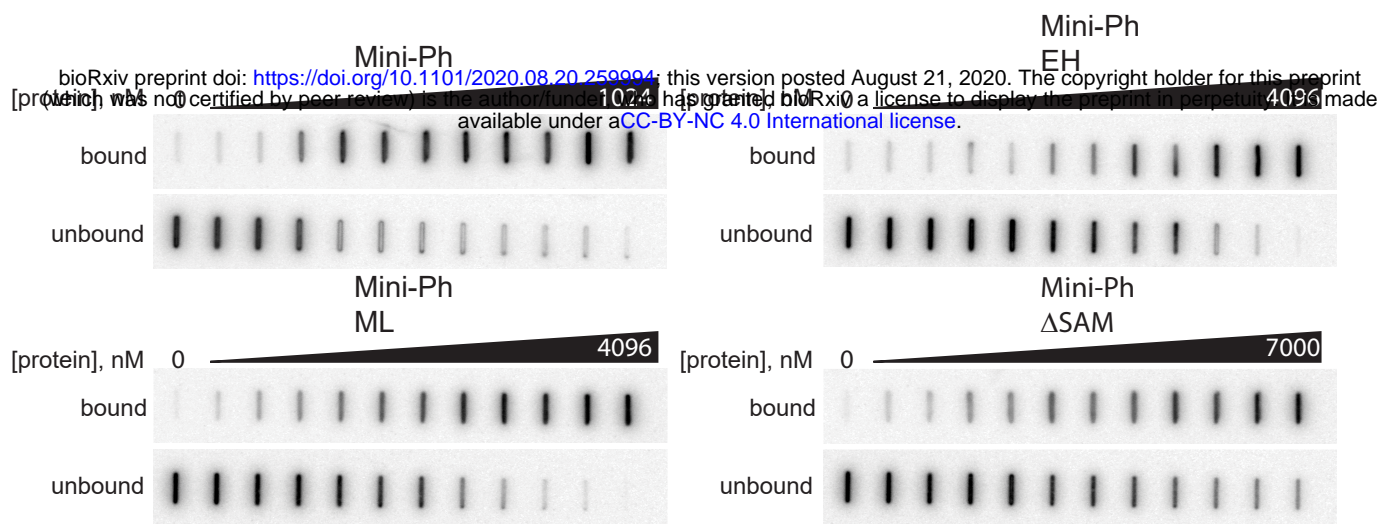

B

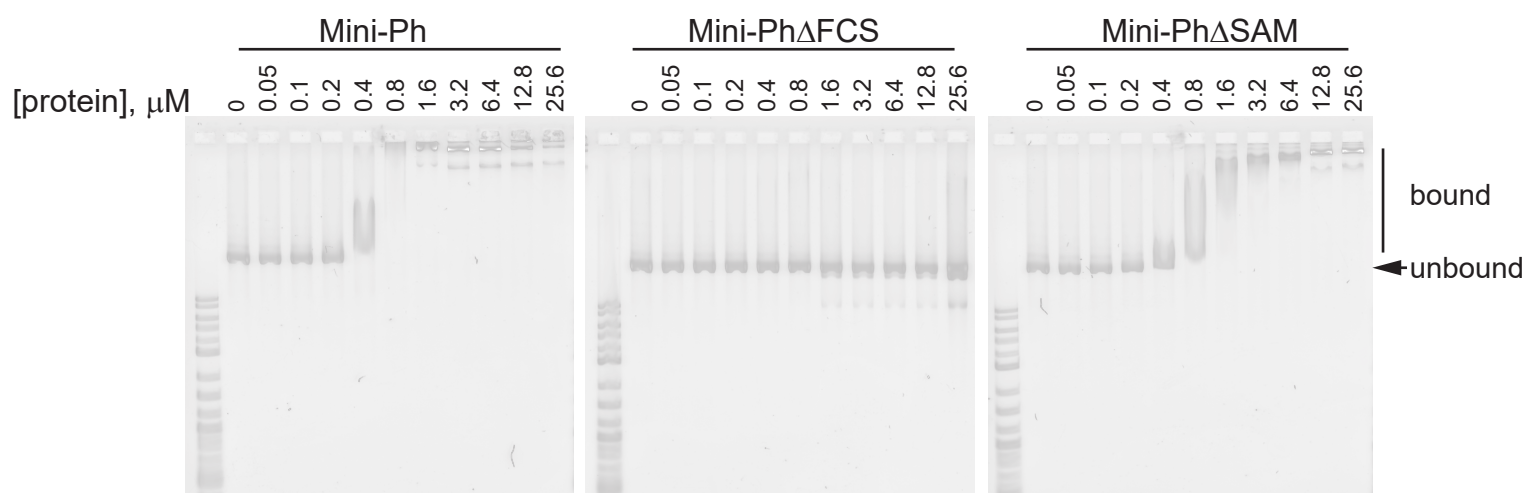

**Supplementary Figure 7 Ph SAM polymerization increases DNA binding affinity of Mini-Ph. A.**

Representative filters from filter binding experiments to measure DNA binding affinity. B. EMSA demonstrating that Mini-Ph $\Delta$ FCS does not bind DNA. Plasmid DNA was used for EMSA; using these large substrates at high concentrations (25 ng plasmid per reaction) underestimates Mini-Ph DNA binding affinity.

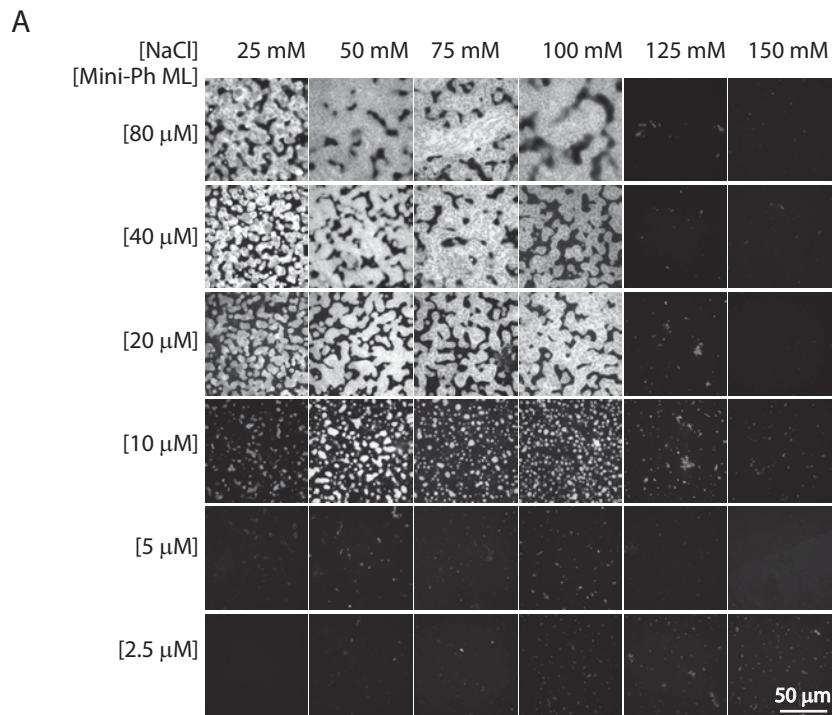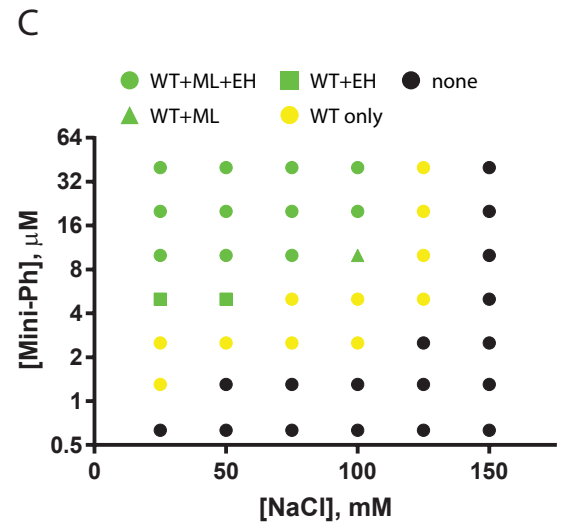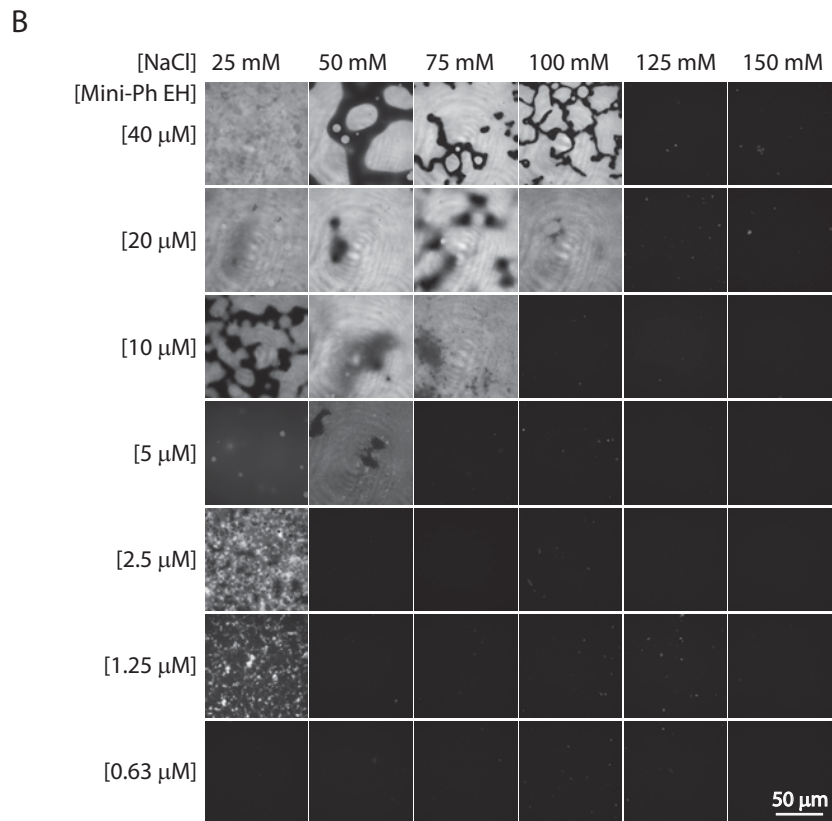

**Supplementary Figure 8 Mini-Ph SAM polymerization mutants are more sensitive to NaCl than wild-type.** A, B. Matrix of of Mini-Ph ML (A), and Mini-Ph EH (B)-DNA condensates and across different concentrations of NaCl. C. Plot of one-phase versus two-phase regimens for Mini-Ph, Mini-Ph ML, and Mini-Ph EH. The difference between green and yellow symbols indicates that condensate formation is more sensitive to NaCl for both mutants. See also Supplementary Figure 3 for the matrix of Mini-Ph versus NaCl.

A

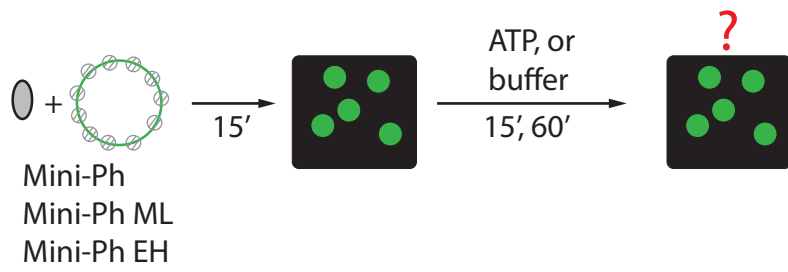

B

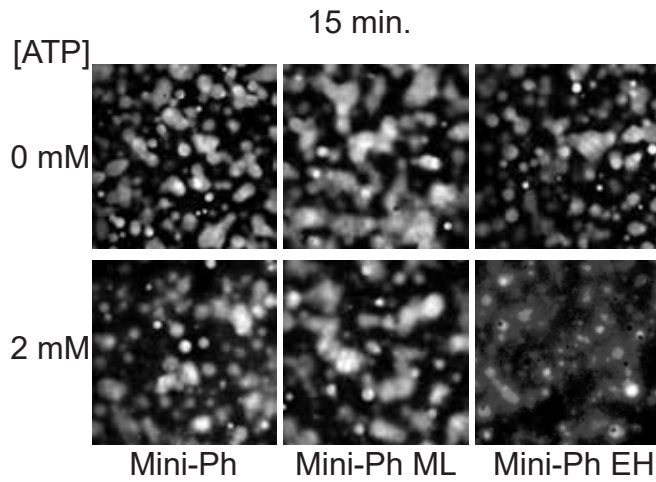

C

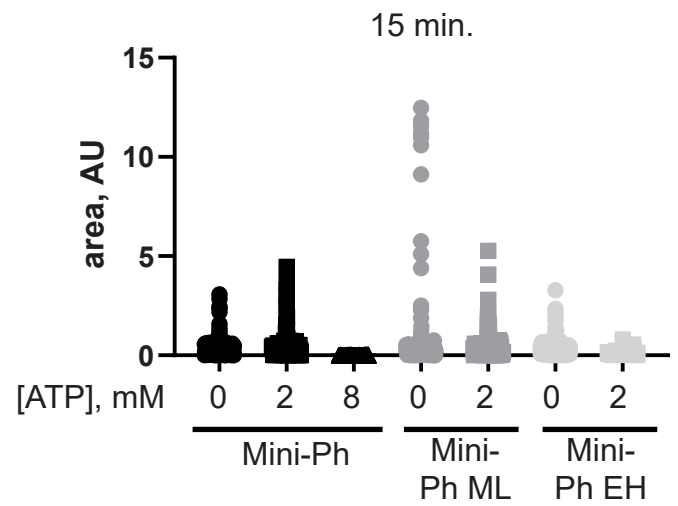

D

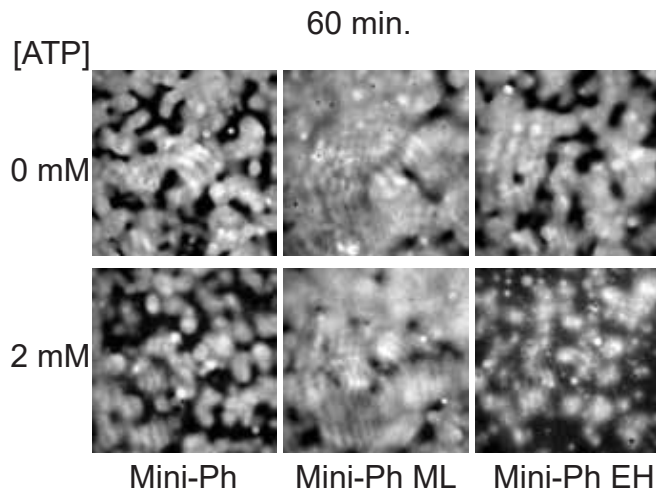

E

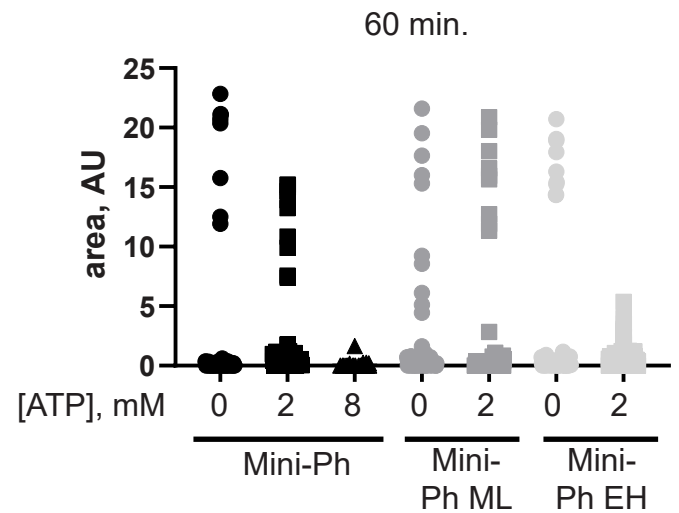

F

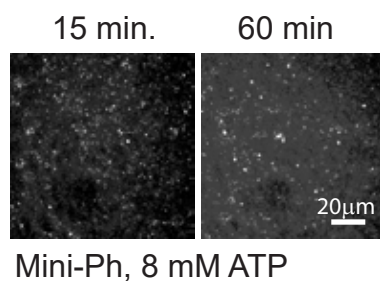



**Supplementary Figure 9 Mini-Ph SAM polymerization mutants are more sensitive to ATP than wild-type Mini-Ph.** A. Schematic of experiments to test effect of adding ATP (or buffer as a control) to condensates formed by Mini-Ph, Mini-Ph ML, or Mini-Ph EH with chromatin. B-E. Representative images (B, D) and quantification (C, E) of condensates after 15 min. incubation with ATP or buffer. F. Effect of 8 mM ATP on condensates formed with Mini-Ph and chromatin.

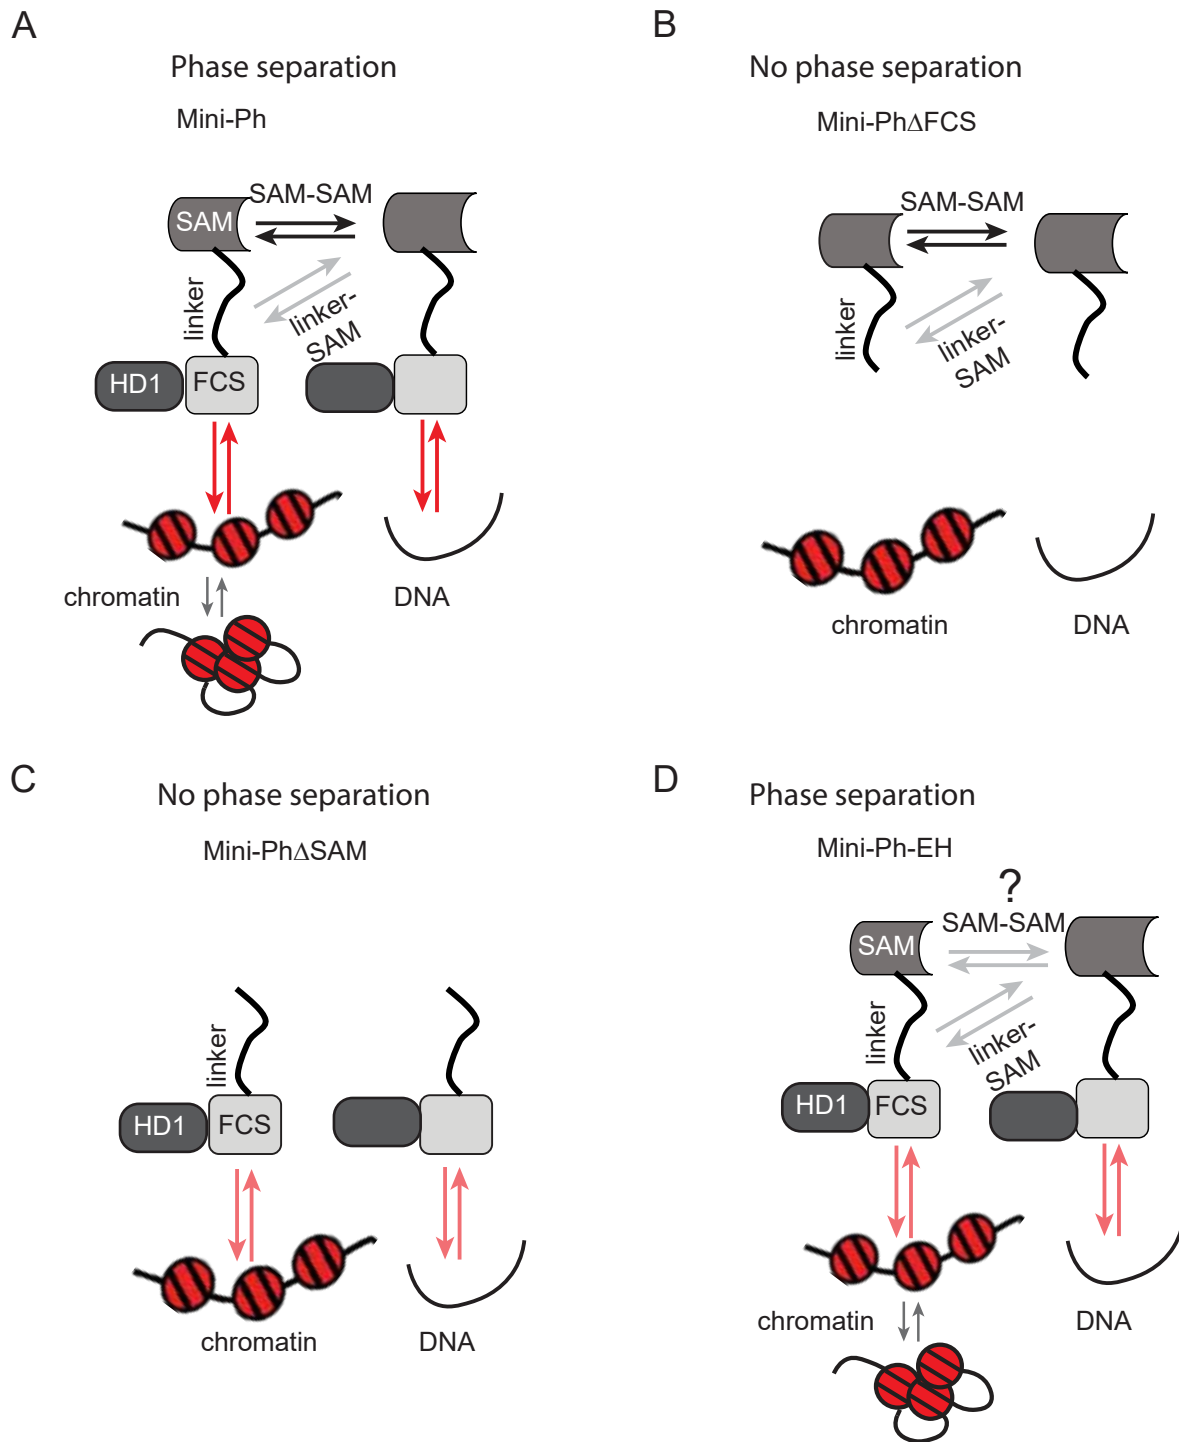

**Supplementary Figure 10 Models for the interactions of Ph SAM in condensate formation. A.**

Schematic of all known interactions that may occur in Mini-Ph-chromatin or Mini-Ph DNA condensates, including interactions among nucleosomes. B-D. Schematic indicating which interactions are missing when different mutated or truncated proteins that do or do not form condensates are used. The FCS-DNA/chromatin interaction is weaker in the absence of the SAM or when the polymerization interface is disrupted. The residual SAM-SAM interaction in the EH mutant is hypothesized based on the acetylation footprinting results (Supplementary Fig. 13F). The ML mutation, which weakens but does not eliminate SAM-SAM interactions may behave similar to the schematic in A (i.e. the SAM-SAM interaction is dynamic under phase separation conditions, unlike wild-type Mini-Ph which forms short, limited polymers before phase separation). It is important to point out that this is the simplest scheme; it is possible that there are other interactions in the system that have not been characterized. These could include interactions involving the HD1, hinted at by the difference in accessibility measured for Mini-Ph and Mini-Ph EH (Fig. 4D, E). We also do not know how the structure of Mini-Ph polymers influences binding to large chromatin or DNA templates, and whether Mini-Ph binding influences nucleosome-nucleosome interactions (as suggested in the diagrams).



**Supplementary Figure 11 Chemical footprinting analysis of lysine accessibility of Mini-Ph alone and with DNA.** A. Structure of the FCS of human PHC1 (PDB 2L8E), with the positions of the equivalent lysine residues in Ph-p indicated. Red numbers indicate positions where accessibility is significantly changed. B. Clustal alignment of human PHCs with Ph-p indicating the relationship between lysines in Ph-p and the sequence of the FCS. C. Average accessibility of lysines in each Mini-Ph region compared across conditions. Accessibility of all residues in each region was averaged for each replicate and the averages compared across conditions by student's t-test with Holm-Sidak correction for multiple comparisons. Bars show the error +/- SEM. n=6.



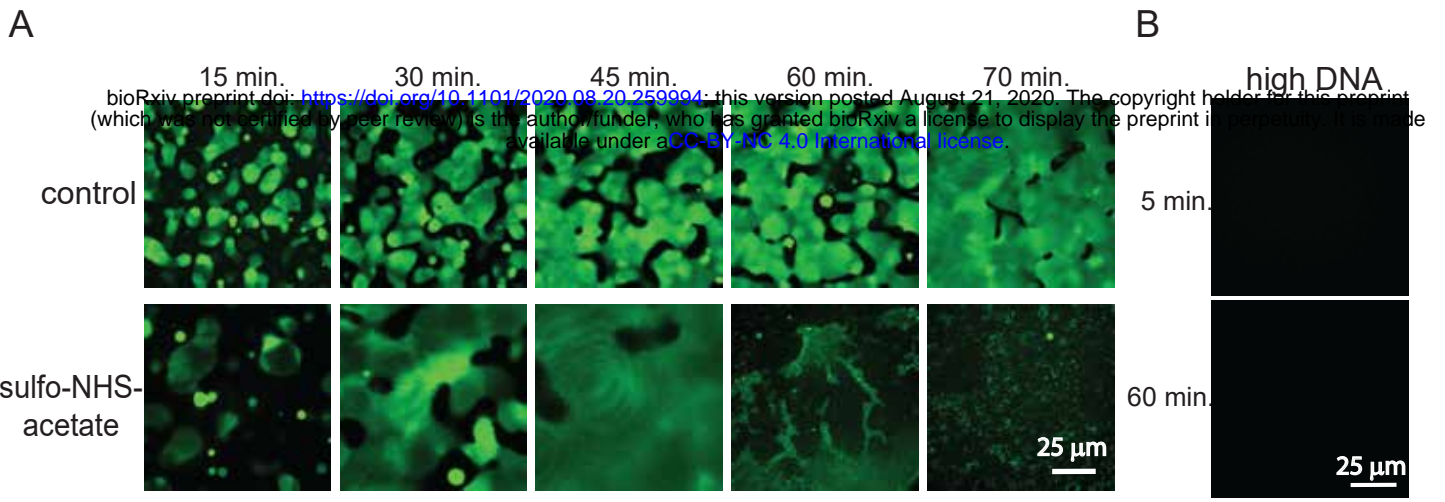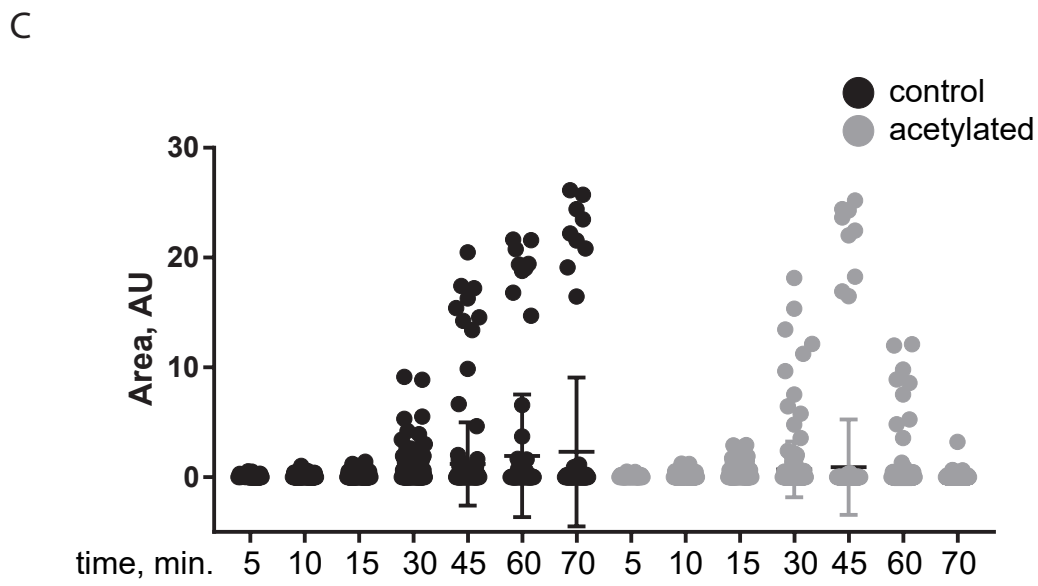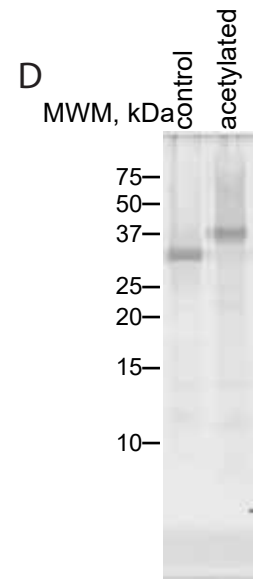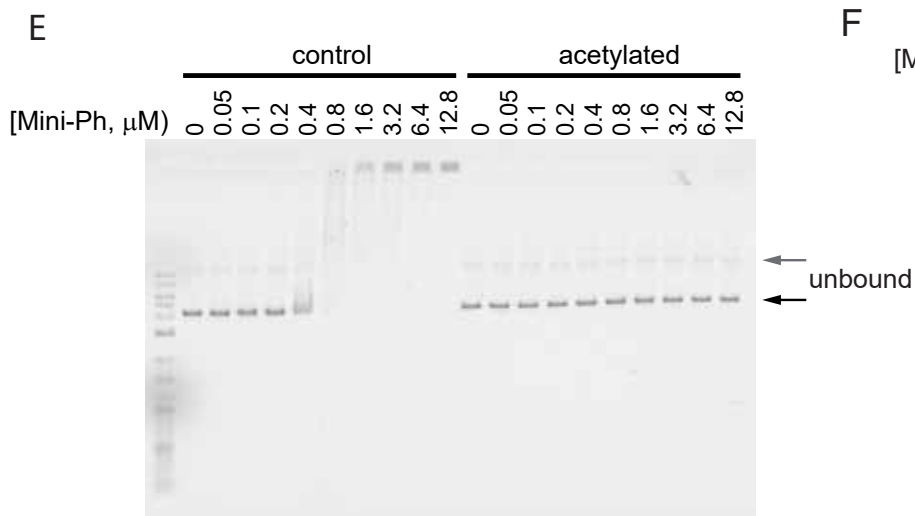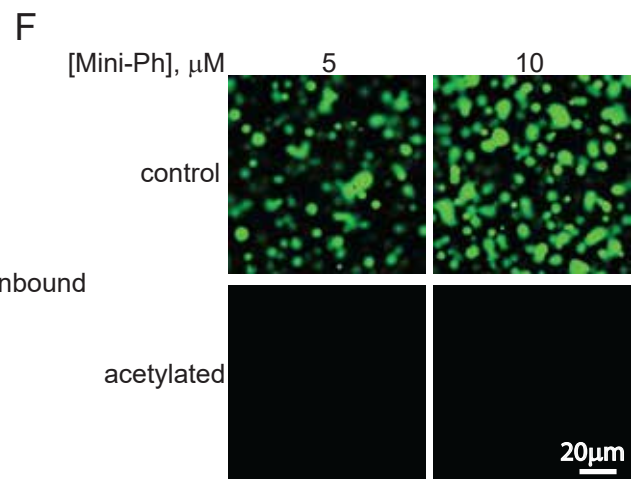

**Supplementary Figure 12 Acetylation of Mini-Ph-DNA blocks condensate formation and DNA binding.**

Time course of effect of sulfo-NHS acetate on Mini-Ph-DNA condensates. Mass spectrometry samples were collected after 15 min. B. Images of high DNA reaction (without acetylation) in which condensates do not form even after prolonged incubation. C. Quantification of time course shown in A. A similar time course was observed in three experiments. D. SYPRO Ruby stained SDS-PAGE of control Mini-Ph and Mini-Ph after acetylation with sulfo-NHS-Acetate. E. EMSA comparing binding of control and acetylated Mini-Ph to DNA; representative of two experiments. Main unbound band is supercoiled plasmid, and faint band (grey arrow) is nicked. F. Acetylated Mini-Ph does not form condensates with chromatin (representative of three experiments). Images were taken after 60 min. incubation at room temperature.

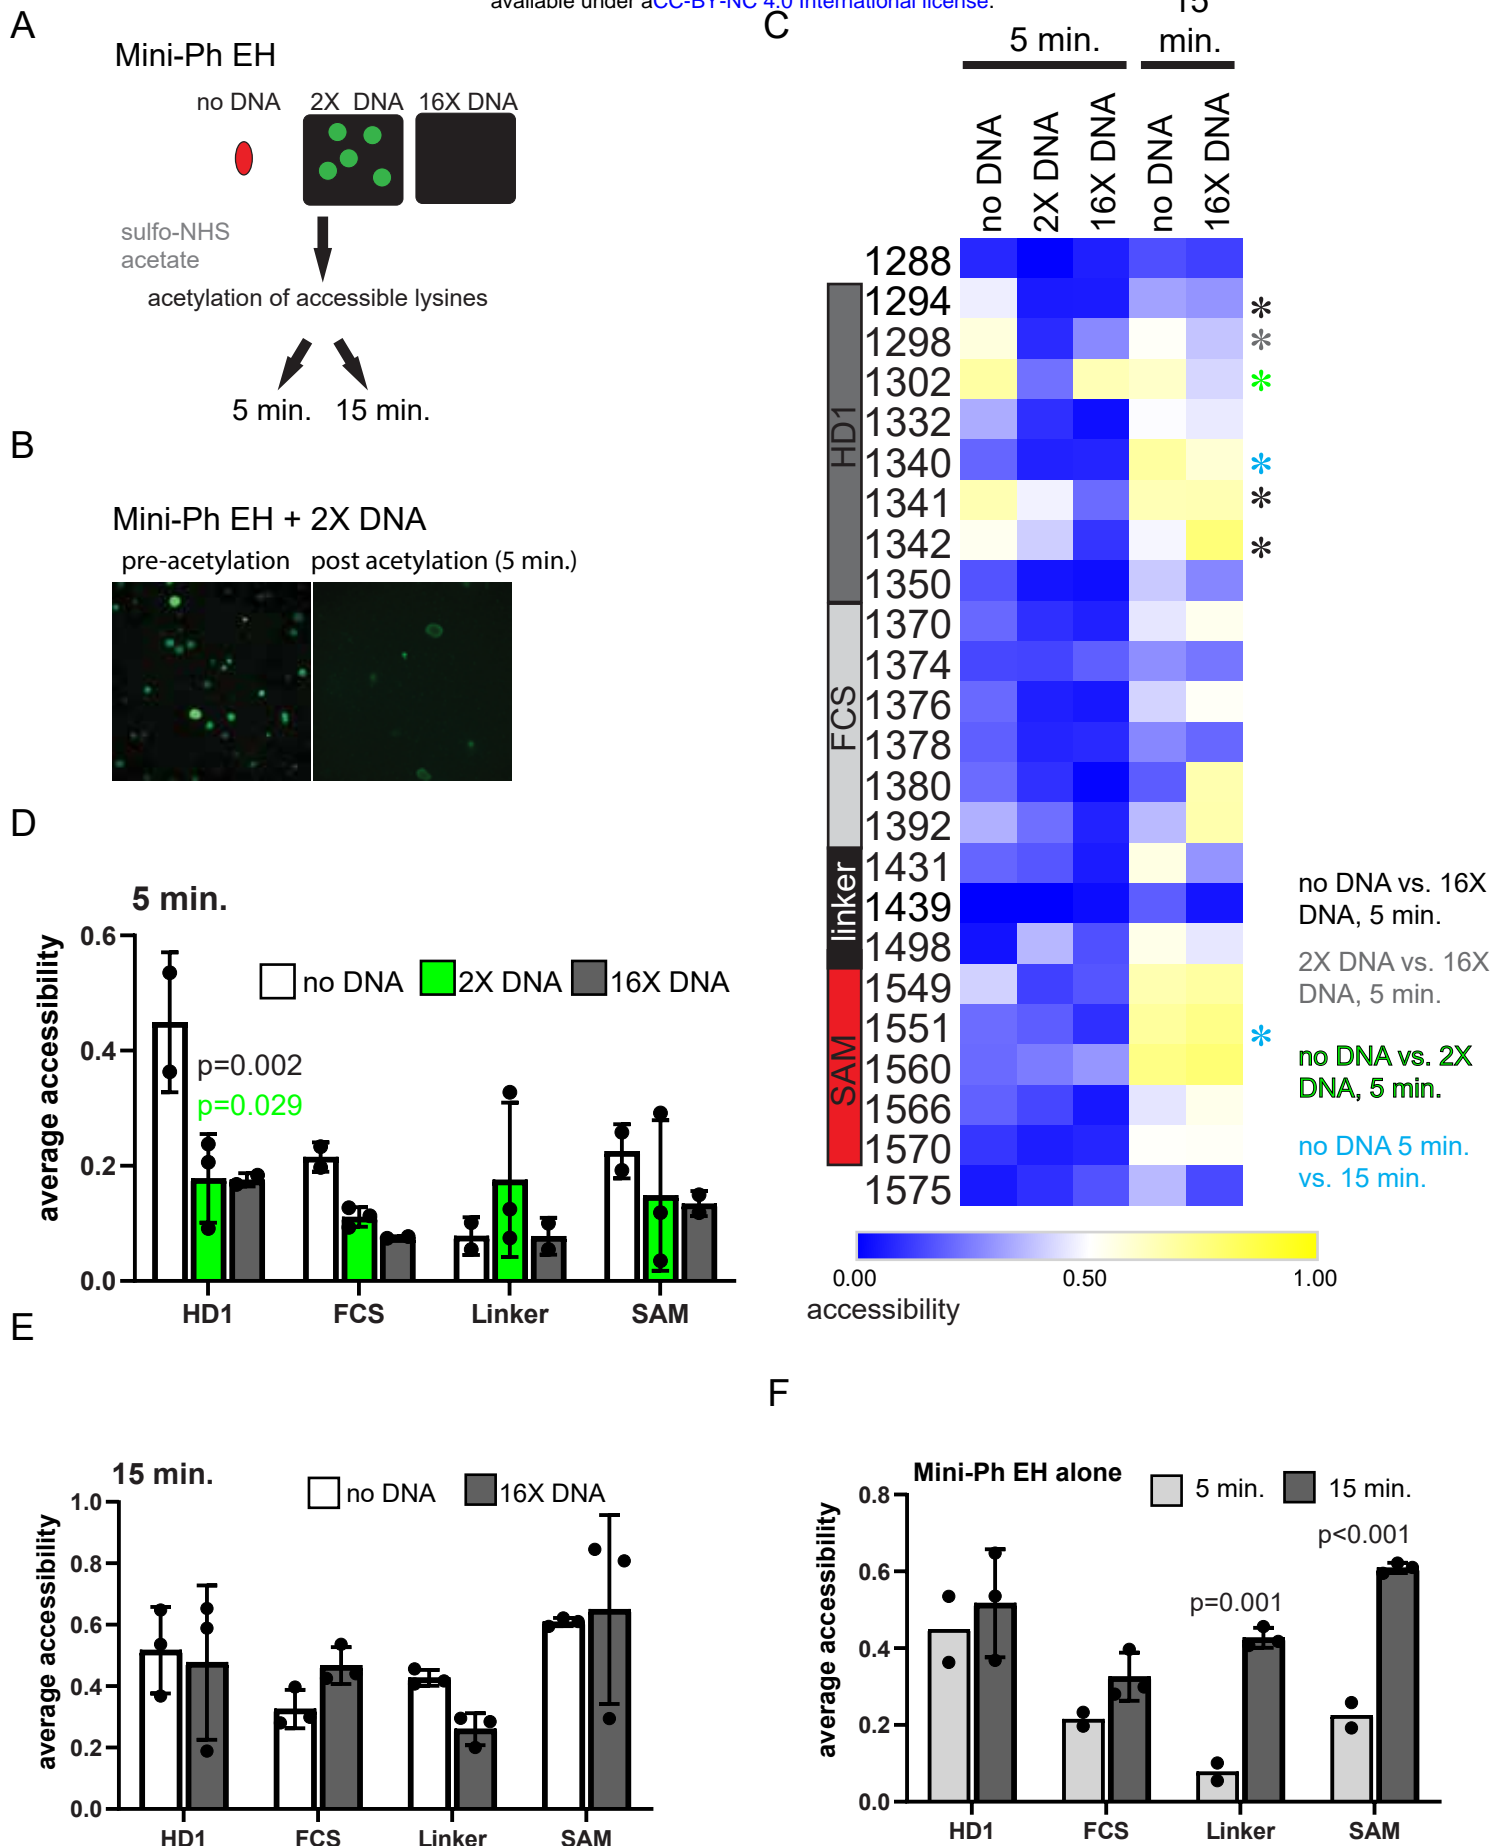

**Supplementary Figure 13 Chemical footprinting analysis of lysine accessibility of polymerization**

**mutant Mini-Ph EH alone and with DNA.** A. Schematic of chemical acetylation (abbreviated from Figure 4A). Acetylation was carried out for 5 or 15 min. with Mini-Ph EH because protein-DNA condensates dissolve rapidly after addition of sulfo-NHS acetate. B. Mini-Ph EH-DNA condensates before (left) and after 5 min. of acetylation (right). C. Heat maps of Mini-Ph EH alone, with 2X DNA (condensates form) or 16X DNA (no condensates). Acetylation was carried out for 5 (n=3) or 15 (n=2) min. Asterisks indicate lysines with significantly different accessibility in the indicated comparisons. D-F. Accessibility averaged over Mini-Ph regions for different conditions after 5 min. (D), 15 min. (E), or 5 versus 15 min. for Mini-Ph EH alone (F). Accessibility of all residues in each region was averaged for each replicate and the averages compared across conditions by student's t-test with Holm-Sidak correction for multiple comparisons. Bars show the error +/- SEM.

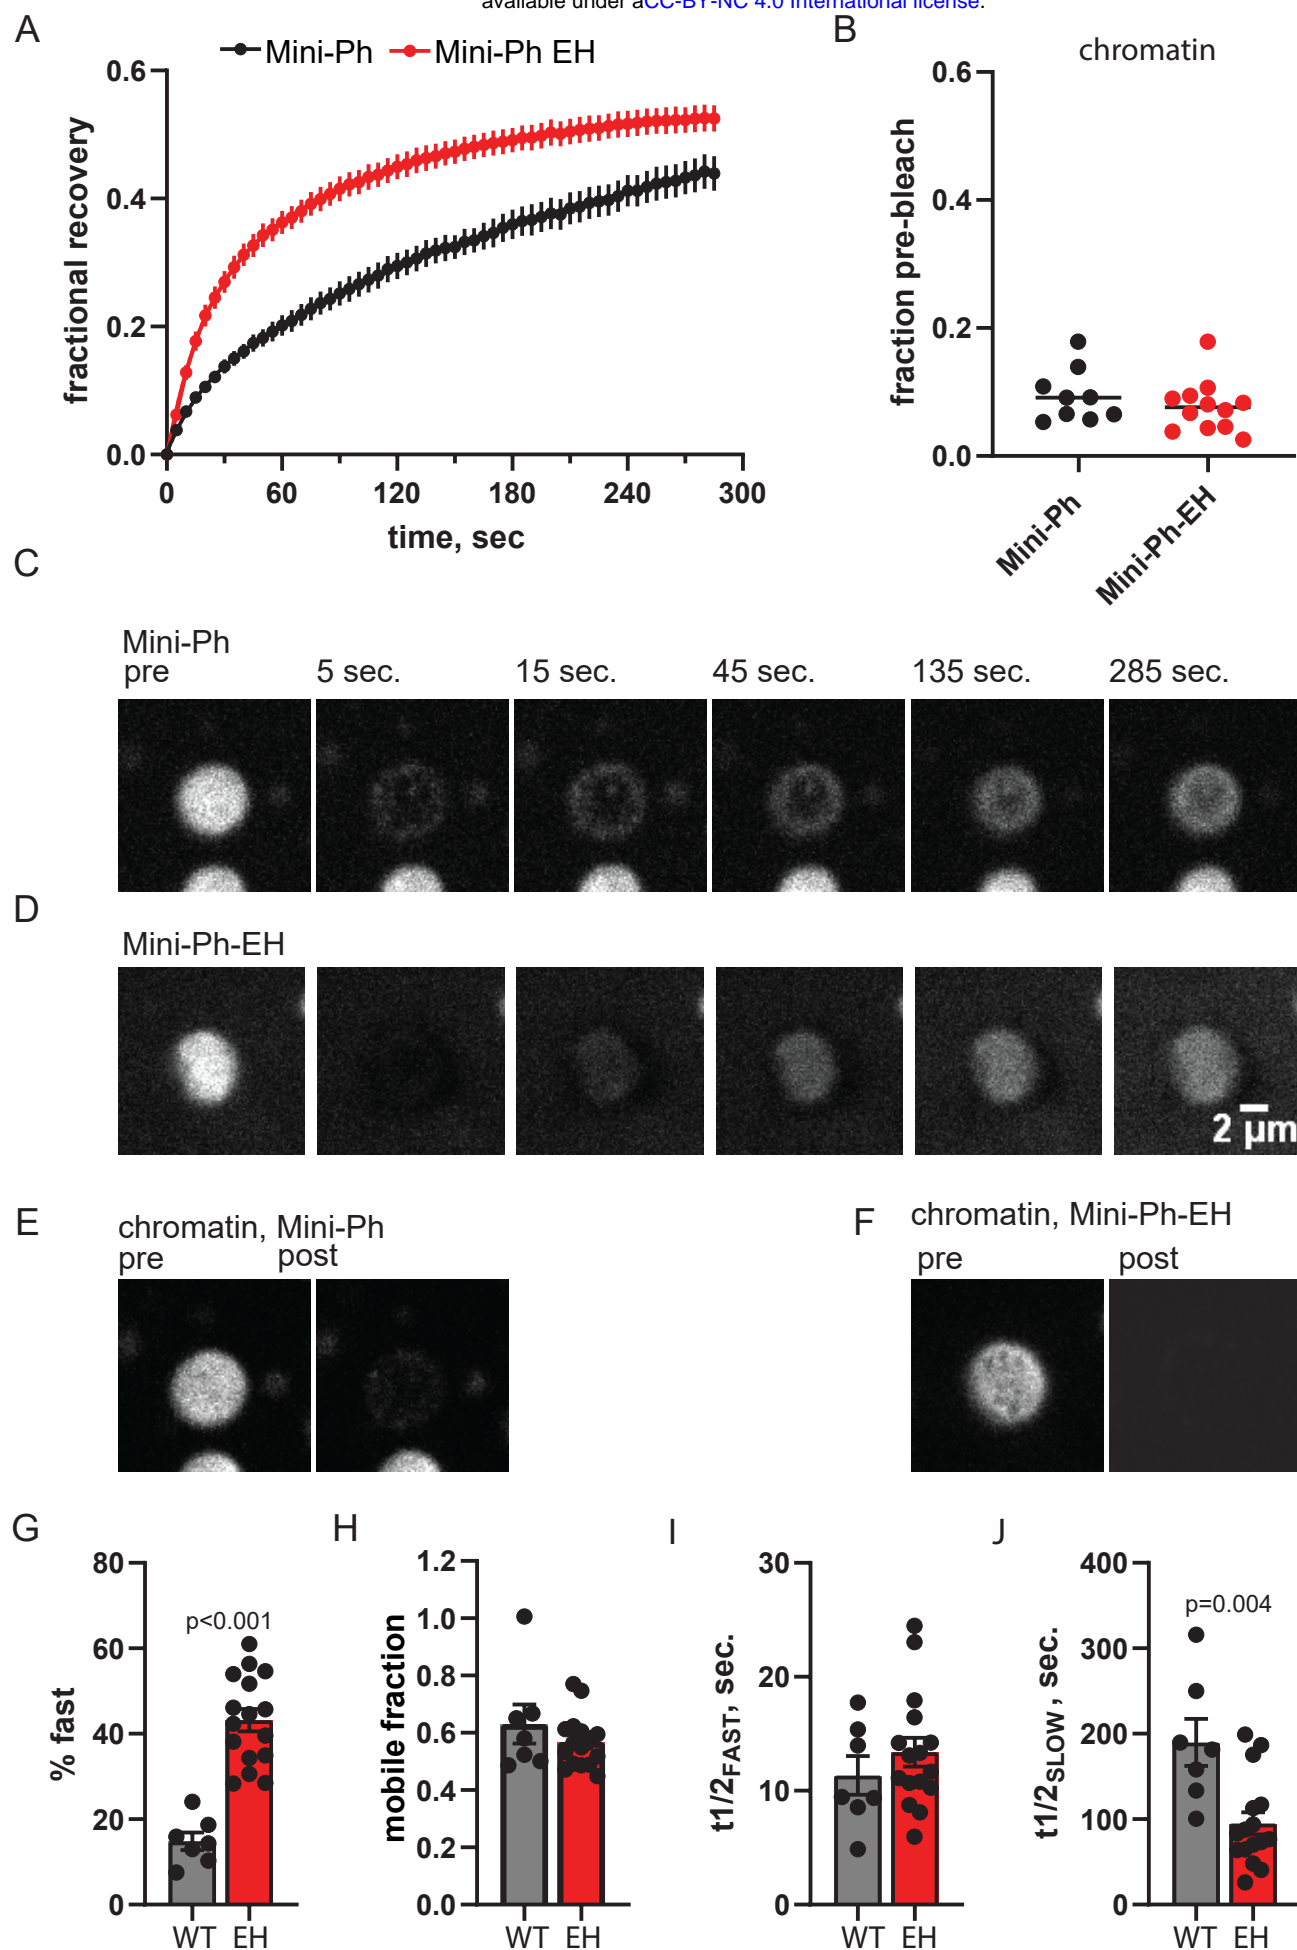



**Supplementary Figure 14 Mini-Ph EH that lacks polymerization activity is more mobile in condensates than wild-type Mini-Ph.** A. FRAP traces for Mini-Ph and Mini-Ph EH with chromatin. Representative traces with  $R^2$  for fits  $>0.99$  were pooled for condensates formed at different times (22-41 min. for Mini-Ph; 28-73 min. for Mini-Ph-EH;  $n=5$ ). Graph shows the mean  $\pm$  SEM. Data were fit with a double exponential equation. B. Fluorescence of chromatin (H2A-Cy3) before and after FRAP experiments. The same regions of interest (ROI) used to measure FRAP, acquisition induced bleaching, and background were used to analyze chromatin as for Mini-Ph. We were unable to collect FRAP traces in both channels simultaneously. C, D. Representative bleaching and recovery of single condensate for Alexa-647 labelled Mini-Ph (C) and Mini-Ph-EH. Condensates were formed for 25 min. for Mini-Ph and 28 min. for Mini-Ph-EH. E, F. Fluorescence of chromatin (H2A-Cy3) for the same condensates shown in C and D immediately before and after the FRAP experiment. G-I Summary of parameters from double exponential fits. All graphs show the mean  $\pm$  SEM. Mini-Ph and Mini-PH EH were compared by Mann-Whitney test. All fits have  $R^2 > 0.99$ .

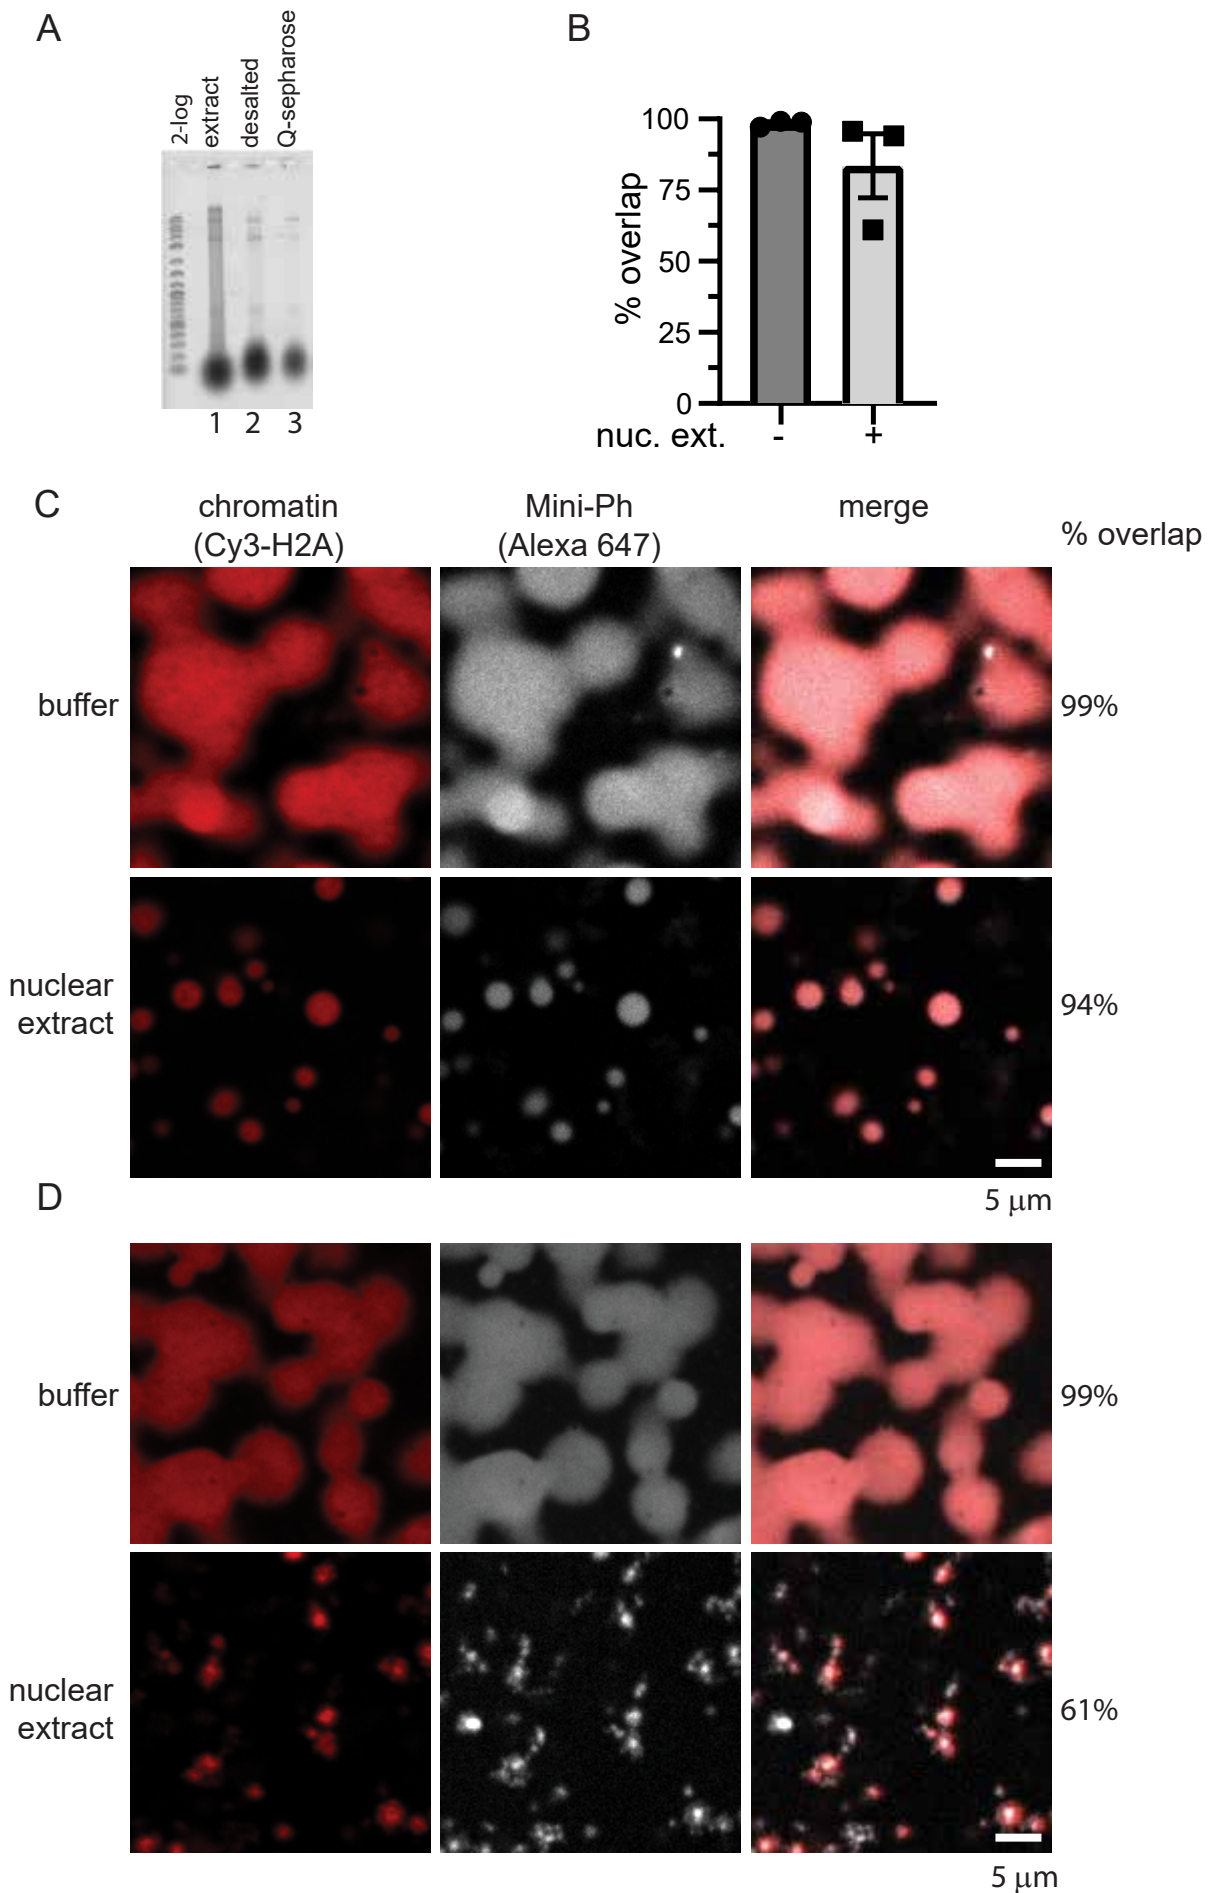

**Supplementary Figure 15 Colocalization analysis of Mini-Ph and chromatin in nuclear extracts.** A. SYBR Gold stained gel of nuclear extract (lane 1), extract after desalting (lane 2), and after incubation with Q-sepharose to deplete nucleic acids (lane 3). B. Summary of overlap between Mini-Ph condensates and chromatin incubated in buffer or in nuclear extract from three experiments. C, D. Representative images from two of the three experiments; two resembled panel C, while in one experiment, Mini-Ph structures that are not positive for Cy3-H2A are observed. These structures frequently appear to be connected to chromatin condensates.

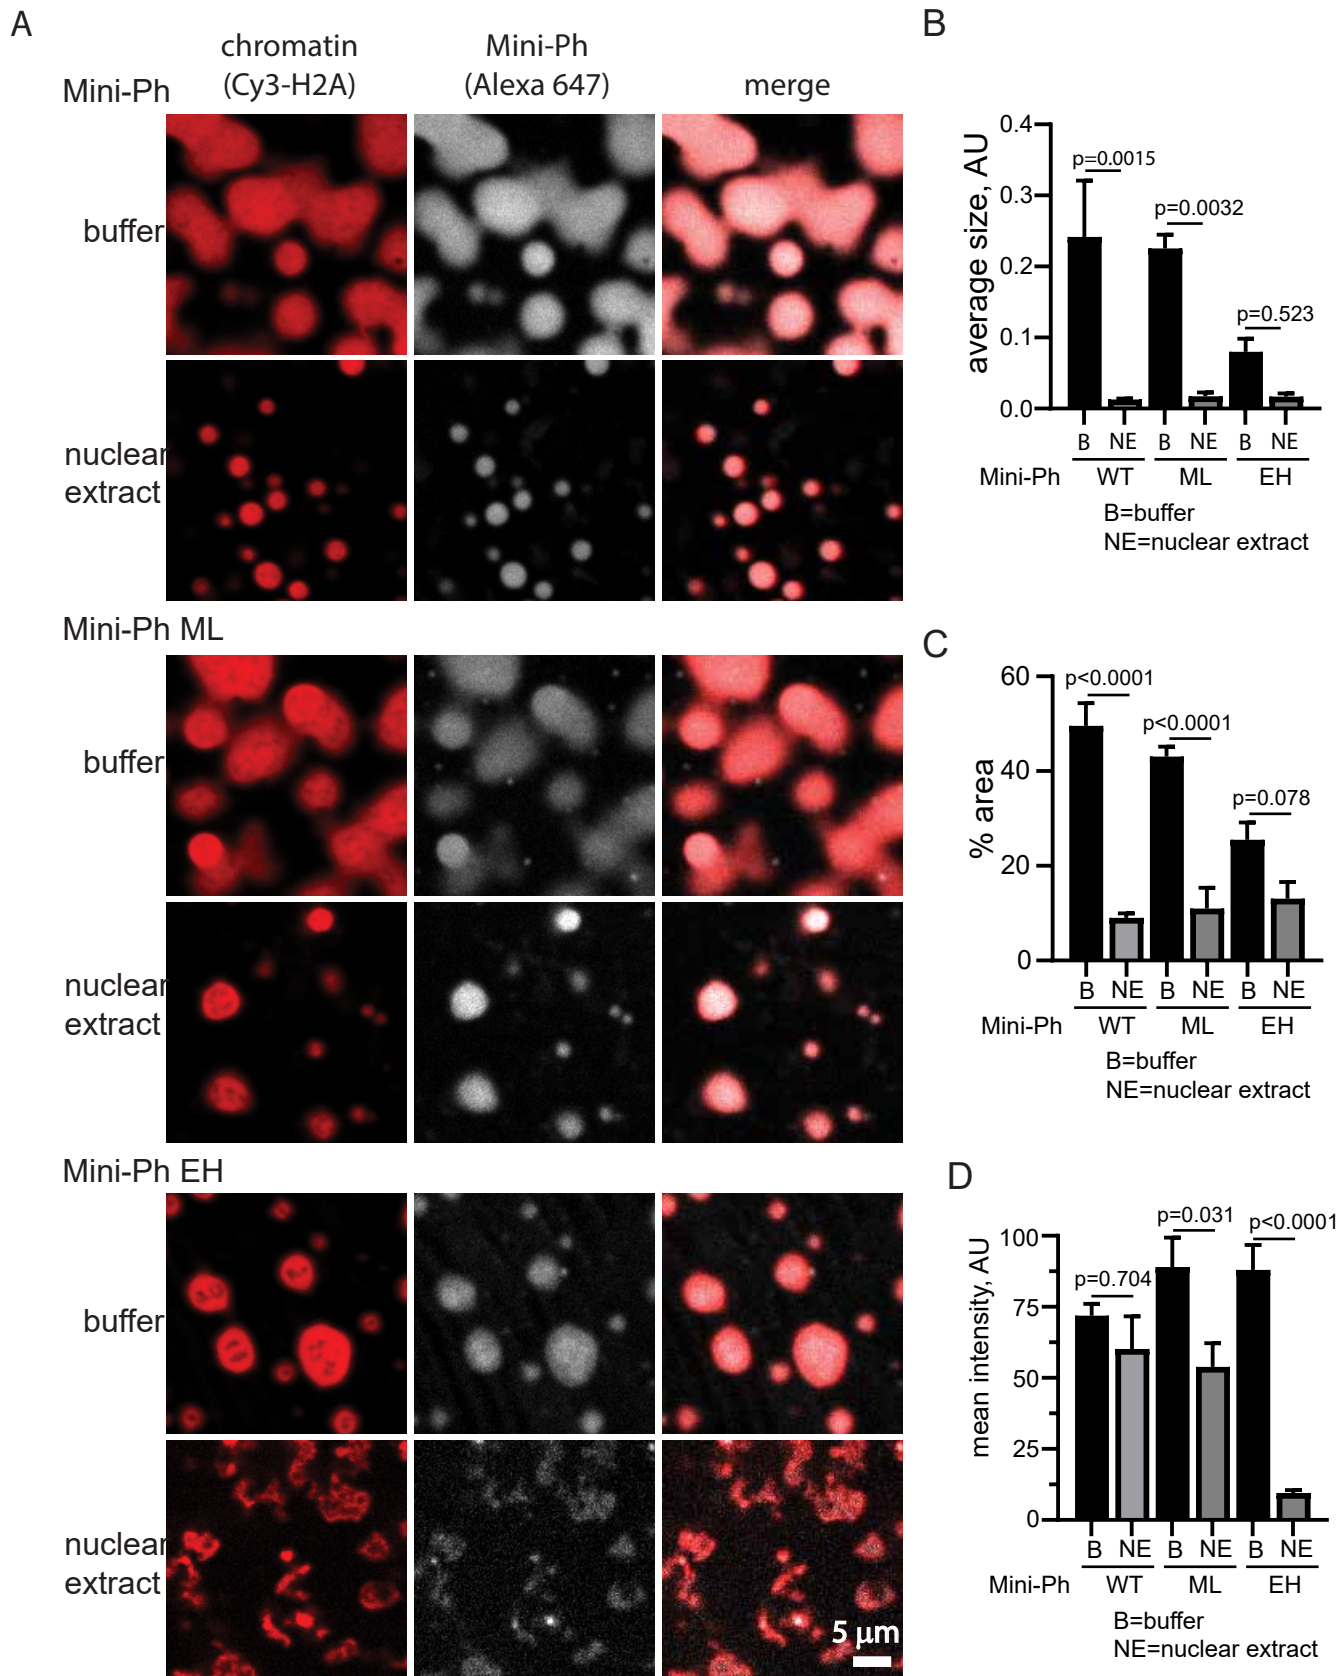

**Supplementary Figure 16 Effect of nuclear extracts on condensates formed by Mini-Ph, or Mini-Ph polymerization mutants with chromatin.** A. Representative images of condensates incubated in buffer (top panel in each set), or nuclear extracts (bottom panel in each set). Image intensities were adjusted to facilitate visualization of the structures. The structures formed by Mini-Ph EH with chromatin in nuclear extract are much fainter than those formed in buffer are. B-D. Average size of structures (B), % area covered by condensates (C), or mean intensity of structures (D) after incubation in buffer or extract from three experiments. Bars are the mean +SEM and p-values are for ANOVA comparing buffer to nuclear extract for each protein with Sidak correction for multiple comparisons.

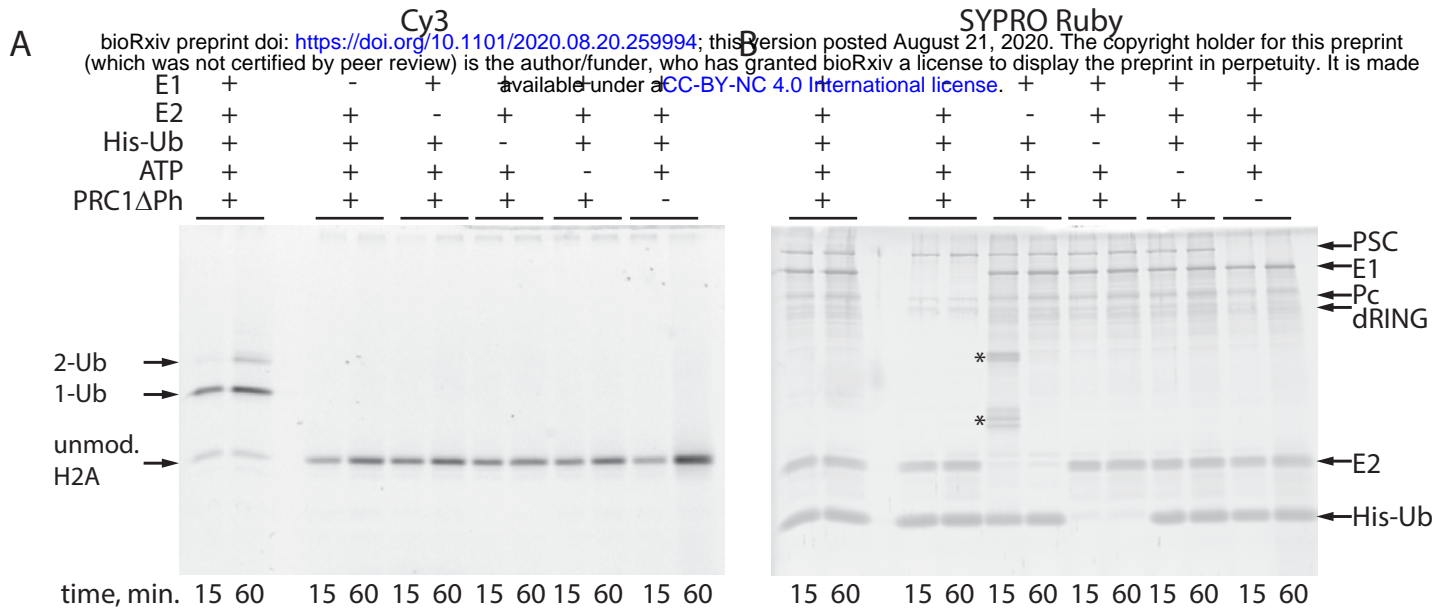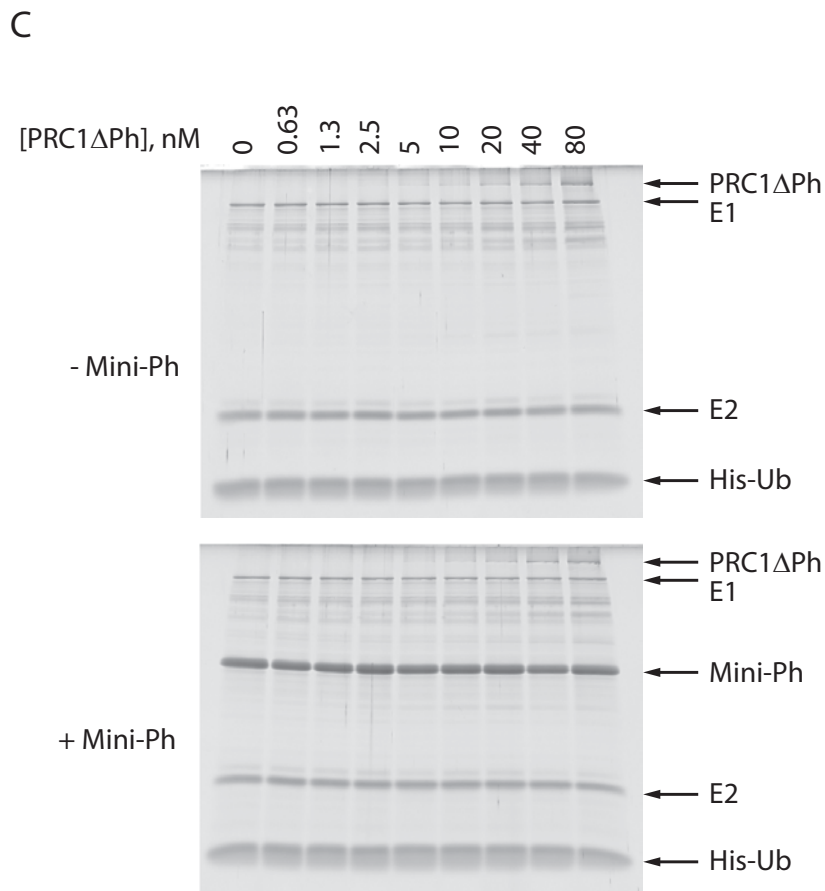



**Supplementary Figure 17 Histone ubiquitylation assay.** A, B. SDS-PAGE of histone ubiquitylation assay. A shows Cy3-labelled histone H2A and B is same gel after SYPRO-Ruby staining. The E1 and E2, ATP, Ubiquitin, and PRC1 $\Delta$ Ph are all required for ubiquitylation. \*contaminants present in one gel lane. C. SYPRO Ruby stain of gels shown in Figure 6.

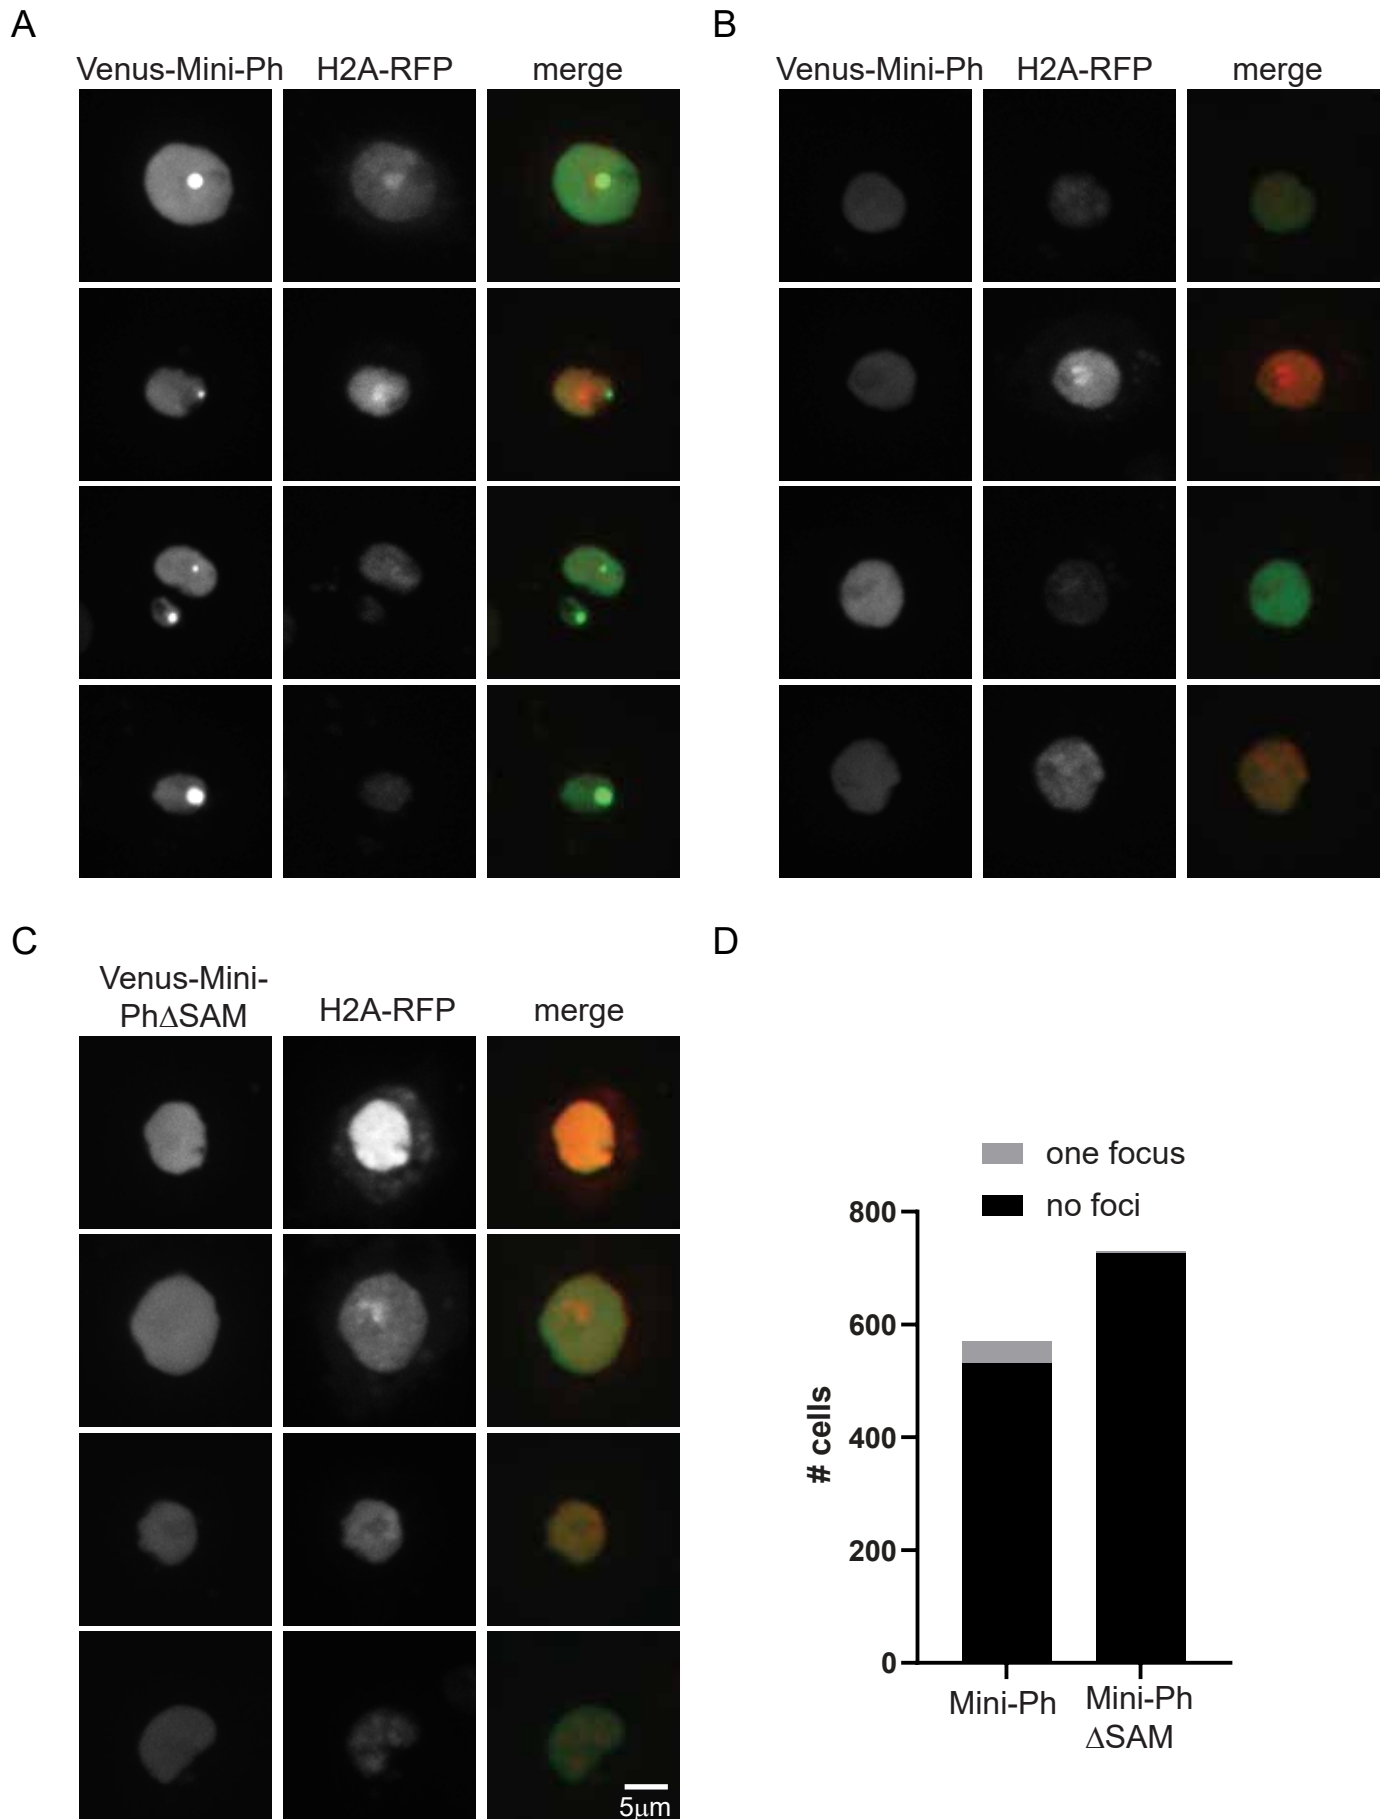

**Supplementary Figure 18 Mini-Ph forms a single, SAM-dependent focus or no foci in cells. A-C.**

Representative images of S2R+ cells transfected with Venus-Mini-Ph (A, B) or Venus-Mini-Ph $\Delta$ SAM (C) and H2A-RFP. Cells expressing Venus-Mini-Ph either have a single focus, as in A, or no foci, as in B. We do not observe multiple Mini-Ph foci in cells. D. Quantification of cells with foci. 7% of Venus-Mini-Ph (39/570) and 0.5% of Venus-Mini-Ph $\Delta$ SAM (4/730) cells were identified as having a single maxima (focus). In the case of Mini-Ph $\Delta$ SAM, the small number of identified foci represent cells with very high expression rather than actual foci.
